# Supplementary material for: PRR adjuvants restrain high stability peptides presentation on APCs
Source: eLife. 2024 Oct 30;13:RP99173. doi: 10.7554/eLife.99173 (PMC11524579; doi:10.7554/eLife.99173)
Supplement: Supplementary file 1. — The whole proteome data of A20 cells treated with different adjuvants at 12 hr. The ‘1 a’ sheet contains the KEGG and GO annotations of proteins from antigen processing, peptidase function, ubiquitination pathway, interferon (IFN) signaling, and H. pylori. The ‘1b’ sheet contains the iBAQ values of each protein in different adjuvant groups. [file elife-99173-supp1.xlsx]

## Sheet: 1a
PG.ProteinGroups	PG.Genes	PG.ProteinNames	Uniprot.Entry	Protein names	Gene Names	Function [CC]	Keywords	Gene Ontology (biological process)	Gene Ontology (molecular function)	Gene Ontology (cellular component)	Pathway	CpG_1	CpG_2	CpG_3	PBS_1	PBS_2	PBS_3	MDP_1	MDP_2	MDP_3	MPLA_1	MPLA_2	MPLA_3	Term
A0A2X4ZKE4	leuS	A0A2X4ZKE4_HELPX	A0A2X4ZKE4	Leucine--tRNA ligase (EC 6.1.1.4) (Leucyl-tRNA synthetase) (LeuRS)	leuS NCTC11637_00156		Aminoacyl-tRNA synthetase;ATP-binding;Cytoplasm;Ligase;Nucleotide-binding;Protein biosynthesis	leucyl-tRNA aminoacylation [GO:0006429]	aminoacyl-tRNA editing activity [GO:0002161]; ATP binding [GO:0005524]; leucine-tRNA ligase activity [GO:0004823]	cytoplasm [GO:0005737]		NaN	NaN	7.12323	NaN	NaN	NaN	NaN	NaN	NaN	NaN	NaN	NaN	H. pylori
I0ZCM9	rplY	A0A2X4ZKJ6_HELPX;I0ZCM9_HELPX	I0ZCM9	50S ribosomal protein L25 (General stress protein CTC)	rplY ctc HP17_03944	FUNCTION: This is one of the proteins that binds to the 5S RNA in the ribosome where it forms part of the central protuberance. {ECO:0000256|HAMAP-Rule:MF_01334}.	Ribonucleoprotein;Ribosomal protein;RNA-binding;rRNA-binding	translation [GO:0006412]	5S rRNA binding [GO:0008097]; structural constituent of ribosome [GO:0003735]	ribonucleoprotein complex [GO:1990904]; ribosome [GO:0005840]		NaN	73.8662	42.3448	71.3048	38.9769	60.674	34.5059	NaN	NaN	NaN	NaN	NaN	H. pylori
I0ZCZ0	NCTC11637_00078	A0A2X4ZKW2_HELPX;I0ZCZ0_HELPX	I0ZCZ0	LPP20 lipofamily protein	HP17_03709		Signal					NaN	NaN	NaN	NaN	NaN	1.11707	NaN	NaN	NaN	NaN	NaN	NaN	H. pylori
A0A2X4ZLE7	groES	A0A2X4ZLE7_HELPX	A0A2X4ZLE7	Co-chaperonin GroES (10 kDa chaperonin) (Chaperonin-10) (Cpn10)	groES groS NCTC11637_00212	FUNCTION: Together with the chaperonin GroEL, plays an essential role in assisting protein folding. The GroEL-GroES system forms a nano-cage that allows encapsulation of the non-native substrate proteins and provides a physical environment optimized to promote and accelerate protein folding. GroES binds to the apical surface of the GroEL ring, thereby capping the opening of the GroEL channel. {EC…	Chaperone;Cytoplasm		ATP binding [GO:0005524]; protein folding chaperone [GO:0044183]	cytoplasm [GO:0005737]		8.04208	7.42774	9.3793	192.76	68.6249	65.4362	31.1397	21.4944	9.84736	32.1446	16.9397	NaN	H. pylori
I0ZGD8	hprA	A0A2X4ZN12_HELPX;I0ZGD8_HELPX	I0ZGD8	2-hydroxyacid dehydrogenase (EC 1.1.1.272)	HP17_00835		Oxidoreductase		(R)-2-hydroxyacid dehydrogenase activity [GO:0050578]; NAD binding [GO:0051287]			NaN	NaN	NaN	216.982	141.045	338.481	NaN	NaN	NaN	597.988	NaN	NaN	H. pylori
A0A2X4ZN43	mcp4_2	A0A2X4ZN43_HELPX	A0A2X4ZN43	Methyl-accepting chemotaxis protein (TlpB)	mcp4_2 NCTC11637_00311		Cell membrane;Membrane;Transducer;Transmembrane;Transmembrane helix	signal transduction [GO:0007165]		plasma membrane [GO:0005886]		213.562	250.665	175.68	258.334	182.584	225.071	159.112	156.468	206.052	174.347	239.009	211.624	H. pylori
I0ZGT8	bdlA_1	A0A2X4ZND7_HELPX;I0ZGT8_HELPX	I0ZGT8	Methyl-accepting chemotaxis protein	HP17_00756		Membrane;Transducer;Transmembrane;Transmembrane helix	signal transduction [GO:0007165]		membrane [GO:0016020]		NaN	312.792	132.372	133.907	192.938	163.007	164.765	295.921	426.791	205.797	413.965	186.178	H. pylori
I0ZGE9	cbf2	A0A2X4ZP25_HELPX;I0ZGE9_HELPX	I0ZGE9	Peptidyl-prolyl cis-trans isomerase C	HP17_08334		Isomerase;Rotamase;Signal		peptidyl-prolyl cis-trans isomerase activity [GO:0003755]			24.3371	12.2434	7.73547	63.0374	39.8469	22.478	24.0499	7.67108	7.87545	13.5602	11.2376	12.9565	H. pylori
I0ZI99	lysS	A0A2X4ZP82_HELPX;I0ZI99_HELPX	I0ZI99	Lysine--tRNA ligase (EC 6.1.1.6)	lysS HP17_06597		Aminoacyl-tRNA synthetase;ATP-binding;Ligase;Magnesium;Metal-binding;Nucleotide-binding	lysyl-tRNA aminoacylation [GO:0006430]	ATP binding [GO:0005524]; lysine-tRNA ligase activity [GO:0004824]; metal ion binding [GO:0046872]; nucleic acid binding [GO:0003676]	cytoplasm [GO:0005737]		476.387	NaN	NaN	372.224	313.402	429.03	NaN	NaN	NaN	674.491	619.843	NaN	H. pylori
I0ZF56	rplB	A0A2X4ZR62_HELPX;I0ZF56_HELPX	I0ZF56	50S ribosomal protein L2	rplB HP17_01643		Ribonucleoprotein;Ribosomal protein	translation [GO:0006412]	RNA binding [GO:0003723]; structural constituent of ribosome [GO:0003735]; transferase activity [GO:0016740]	large ribosomal subunit [GO:0015934]		480.391	442.385	448.573	407.626	447.807	419.695	410.269	511.834	518.102	549.244	529.999	NaN	H. pylori
I0ZFD8	rpsD	A0A2X4ZRN2_HELPX;I0ZFD8_HELPX	I0ZFD8	30S ribosomal protein S4	rpsD HP17_01523	FUNCTION: One of the primary rRNA binding proteins, it binds directly to 16S rRNA where it nucleates assembly of the body of the 30S subunit. {ECO:0000256|HAMAP-Rule:MF_01306}.; FUNCTION: With S5 and S12 plays an important role in translational accuracy. {ECO:0000256|HAMAP-Rule:MF_01306}.	Ribonucleoprotein;Ribosomal protein;RNA-binding;rRNA-binding	translation [GO:0006412]	rRNA binding [GO:0019843]; structural constituent of ribosome [GO:0003735]	small ribosomal subunit [GO:0015935]		NaN	164.733	183.622	186.412	188.395	212.889	209.703	170.993	207.26	252.266	372.087	NaN	H. pylori
I0ZFC7	hel	A0A2X4ZRT5_HELPX;I0ZFC7_HELPX	I0ZFC7	Acid phosphatase lipoprotein	HP17_01468		Signal			cell outer membrane [GO:0009279]		NaN	NaN	NaN	32.5844	NaN	33.5766	NaN	NaN	NaN	NaN	NaN	NaN	H. pylori
A0A2X4ZRY0	rpoBC	A0A2X4ZRY0_HELPX	A0A2X4ZRY0	Multifunctional fusion protein [Includes: DNA-directed RNA polymerase subunit beta (RNAP subunit beta) (EC 2.7.7.6) (RNA polymerase subunit beta) (Transcriptase subunit beta); DNA-directed RNA polymerase subunit beta' (RNAP subunit beta') (RNA polymerase subunit beta') (Transcriptase subunit beta')]	rpoBC rpoB rpoC NCTC11637_00618	FUNCTION: DNA-dependent RNA polymerase catalyzes the transcription of DNA into RNA using the four ribonucleoside triphosphates as substrates. {ECO:0000256|HAMAP-Rule:MF_01321, ECO:0000256|RuleBase:RU004279}.	DNA-directed RNA polymerase;Magnesium;Metal-binding;Nucleotidyltransferase;Transcription;Transferase;Zinc	DNA-templated transcription [GO:0006351]	DNA binding [GO:0003677]; DNA-directed 5'-3' RNA polymerase activity [GO:0003899]; magnesium ion binding [GO:0000287]; ribonucleoside binding [GO:0032549]; zinc ion binding [GO:0008270]	DNA-directed RNA polymerase complex [GO:0000428]		187.111	197.31	182.37	211.13	187.925	201.295	156.19	179.817	181.758	203.218	229.453	293.813	H. pylori
I0ZF81	rpsF	A0A2X4ZRY4_HELPX;I0ZF81_HELPX	I0ZF81	30S ribosomal protein S6	rpsF HP17_01228	FUNCTION: Binds together with S18 to 16S ribosomal RNA. {ECO:0000256|ARBA:ARBA00003052, ECO:0000256|HAMAP-Rule:MF_00360}.	Ribonucleoprotein;Ribosomal protein;RNA-binding;rRNA-binding	translation [GO:0006412]	rRNA binding [GO:0019843]; structural constituent of ribosome [GO:0003735]	ribonucleoprotein complex [GO:1990904]; ribosome [GO:0005840]		NaN	NaN	NaN	20.7905	NaN	NaN	NaN	NaN	NaN	6.78902	NaN	NaN	H. pylori
I0ZE01	NCTC11637_00581	A0A2X4ZS11_HELPX;I0ZE01_HELPX	I0ZE01	Cytochrome c-553	HP17_02723		Heme;Iron;Metal-binding;Signal		electron transfer activity [GO:0009055]; heme binding [GO:0020037]; iron ion binding [GO:0005506]			NaN	NaN	NaN	242.436	NaN	119.016	44.1639	60.1986	NaN	NaN	NaN	NaN	H. pylori
I0ZDV8	hisS	A0A2X4ZSC5_HELPX;I0ZDV8_HELPX	I0ZDV8	Histidine--tRNA ligase (EC 6.1.1.21) (Histidyl-tRNA synthetase) (HisRS)	hisS HP17_02937		Aminoacyl-tRNA synthetase;ATP-binding;Cytoplasm;Ligase;Nucleotide-binding;Protein biosynthesis	histidyl-tRNA aminoacylation [GO:0006427]	ATP binding [GO:0005524]; histidine-tRNA ligase activity [GO:0004821]	cytoplasm [GO:0005737]		NaN	NaN	247.072	NaN	NaN	NaN	NaN	NaN	NaN	NaN	NaN	NaN	H. pylori
I0ZGJ5	fldA	A0A2X4ZSH0_HELPX;I0ZGJ5_HELPX	I0ZGJ5	Flavodoxin	HP17_08234	FUNCTION: Low-potential electron donor to a number of redox enzymes. {ECO:0000256|PIRNR:PIRNR038996}.	Electron transport;Flavoprotein;FMN;Transport		electron transfer activity [GO:0009055]; FMN binding [GO:0010181]			62.3174	96.542	74.8539	783.277	471.684	193.224	32.5202	103.566	112.646	58.4801	64.8597	81.9626	H. pylori
A0A2X4ZSJ5	NCTC11637_00729	A0A2X4ZSJ5_HELPX	A0A2X4ZSJ5	Cag pathogenicity island protein	NCTC11637_00729		Coiled coil					NaN	NaN	200.107	287.118	216.271	NaN	244.991	254.81	NaN	NaN	NaN	NaN	H. pylori
I0ZD58	ggt	A0A2X4ZSP9_HELPX;I0ZD58_HELPX	I0ZD58	Glutathione hydrolase proenzyme (EC 2.3.2.2) (EC 3.4.19.13) [Cleaved into: Glutathione hydrolase large chain; Glutathione hydrolase small chain]	HP17_03464		Acyltransferase;Glutathione biosynthesis;Hydrolase;Transferase;Zymogen	glutathione biosynthetic process [GO:0006750]; glutathione catabolic process [GO:0006751]	glutathione hydrolase activity [GO:0036374]; hypoglycin A gamma-glutamyl transpeptidase activity [GO:0102953]; leukotriene C4 gamma-glutamyl transferase activity [GO:0103068]		PATHWAY: Sulfur metabolism; glutathione metabolism. {ECO:0000256|RuleBase:RU368036}.	NaN	NaN	NaN	4.23078	NaN	NaN	1.71043	NaN	NaN	NaN	NaN	NaN	H. pylori
I0ZHC7	NCTC11637_00720	A0A2X4ZSW5_HELPX;I0ZHC7_HELPX	I0ZHC7	M23 family metallopeptidase	HP17_07532		Hydrolase;Membrane;Transmembrane;Transmembrane helix		hydrolase activity [GO:0016787]	membrane [GO:0016020]		203.385	203.893	199.439	224.8	128.294	172.72	143.371	187.272	196.628	214.263	258.309	214.667	H. pylori
A0A2X4ZSZ7	grpE	A0A2X4ZSZ7_HELPX	A0A2X4ZSZ7	Protein GrpE (HSP-70 cofactor)	grpE NCTC11637_00318	FUNCTION: Participates actively in the response to hyperosmotic and heat shock by preventing the aggregation of stress-denatured proteins, in association with DnaK and GrpE. It is the nucleotide exchange factor for DnaK and may function as a thermosensor. Unfolded proteins bind initially to DnaJ; upon interaction with the DnaJ-bound protein, DnaK hydrolyzes its bound ATP, resulting in the formati…	Chaperone;Cytoplasm;Stress response	protein folding [GO:0006457]	adenyl-nucleotide exchange factor activity [GO:0000774]; protein homodimerization activity [GO:0042803]; protein-folding chaperone binding [GO:0051087]	cytoplasm [GO:0005737]		122.341	64.9674	38.9949	290.507	168.954	99.1514	39.6672	107.91	46.3852	30.4873	13.0119	19.6132	H. pylori
A0A2X4ZTJ2	NCTC11637_00106	A0A2X4ZTJ2_HELPX	A0A2X4ZTJ2	Flagellar hook-length control protein FliK	NCTC11637_00106							321.909	376.101	312.443	277.187	233.053	347.56	379.67	353.827	440.747	413.314	527.009	430.671	H. pylori
I0ZB58	apt	A0A2X4ZTW3_HELPX;I0ZB58_HELPX	I0ZB58	Adenine phosphoribosyltransferase (APRT) (EC 2.4.2.7)	apt HP17_05760	FUNCTION: Catalyzes a salvage reaction resulting in the formation of AMP, that is energically less costly than de novo synthesis. {ECO:0000256|HAMAP-Rule:MF_00004}.	Cytoplasm;Glycosyltransferase;Purine salvage;Transferase	adenine salvage [GO:0006168]; AMP salvage [GO:0044209]; purine ribonucleoside salvage [GO:0006166]	adenine phosphoribosyltransferase activity [GO:0003999]	cytoplasm [GO:0005737]	PATHWAY: Purine metabolism; AMP biosynthesis via salvage pathway; AMP from adenine: step 1/1. {ECO:0000256|ARBA:ARBA00004659, ECO:0000256|HAMAP-Rule:MF_00004}.	35.7532	19.5238	NaN	NaN	18.065	NaN	NaN	NaN	NaN	NaN	NaN	NaN	H. pylori
I0ZBH3	NCTC11637_00875	A0A2X4ZU27_HELPX;I0ZBH3_HELPX	I0ZBH3	Uracil-DNA glycosylase-like domain-containing protein	HP17_05315							119.793	170.103	160.264	126.972	116.411	185.909	142.851	144.822	111.661	111.346	97.0389	130.409	H. pylori
I0ZIA6	frdA	A0A2X4ZU87_HELPX;I0ZIA6_HELPX	I0ZIA6	succinate dehydrogenase (EC 1.3.5.1)	HP17_06642		Electron transport;Flavoprotein;Membrane;Oxidoreductase;Transport		oxidoreductase activity [GO:0016491]	plasma membrane [GO:0005886]		486.551	434.215	393.72	325.689	565.185	508.688	384.342	241.799	385.512	280.084	468.033	666.159	H. pylori
I0ZC37	pdxJ	A0A2X4ZUA2_HELPX;I0ZC37_HELPX	I0ZC37	Pyridoxine 5'-phosphate synthase (PNP synthase) (EC 2.6.99.2)	pdxJ HP17_04536	FUNCTION: Catalyzes the complicated ring closure reaction between the two acyclic compounds 1-deoxy-D-xylulose-5-phosphate (DXP) and 3-amino-2-oxopropyl phosphate (1-amino-acetone-3-phosphate or AAP) to form pyridoxine 5'-phosphate (PNP) and inorganic phosphate. {ECO:0000256|HAMAP-Rule:MF_00279}.	Cytoplasm;Pyridoxine biosynthesis;Transferase	pyridoxine biosynthetic process [GO:0008615]	pyridoxine 5'-phosphate synthase activity [GO:0033856]	cytoplasm [GO:0005737]	PATHWAY: Cofactor biosynthesis; pyridoxine 5'-phosphate biosynthesis; pyridoxine 5'-phosphate from D-erythrose 4-phosphate: step 5/5. {ECO:0000256|HAMAP-Rule:MF_00279}.	45.7488	47.1711	65.3701	68.6219	50.6538	30.2335	47.3657	28.3527	30.3361	50.3399	57.9226	NaN	H. pylori
A0A2X4ZUG2	gltA	A0A2X4ZUG2_HELPX	A0A2X4ZUG2	Citrate synthase	gltA NCTC11637_00226		Acyltransferase;Transferase	tricarboxylic acid cycle [GO:0006099]	citrate (Si)-synthase activity [GO:0004108]	cytoplasm [GO:0005737]	PATHWAY: Carbohydrate metabolism; tricarboxylic acid cycle; isocitrate from oxaloacetate: step 1/2. {ECO:0000256|ARBA:ARBA00004751}.	NaN	NaN	NaN	484.953	399.853	481.21	193.716	320.215	408.568	NaN	NaN	NaN	H. pylori
I0ZIY8	NCTC11637_00882	A0A2X4ZUN3_HELPX;I0ZIY8_HELPX	I0ZIY8	Processing zinc-metalloprotease	HP17_06182		Hydrolase;Metalloprotease;Protease;Signal	proteolysis [GO:0006508]	metal ion binding [GO:0046872]; metallopeptidase activity [GO:0008237]			NaN	NaN	NaN	115.003	NaN	NaN	NaN	NaN	NaN	NaN	NaN	NaN	H. pylori
I0ZGY8	flaG	A0A2X4ZVA4_HELPX;I0ZGY8_HELPX	I0ZGY8	Flagellar protein FlaG	HP17_07932		Cell projection;Cilium;Flagellum					429.041	483.822	434.617	506.735	478.1	558.354	397.109	391.309	356.126	360.093	397.056	441.879	H. pylori
I0ZFF2	rplE	A0A2X4ZWI0_HELPX;I0ZFF2_HELPX	I0ZFF2	50S ribosomal protein L5	rplE HP17_01593	FUNCTION: This is 1 of the proteins that binds and probably mediates the attachment of the 5S RNA into the large ribosomal subunit, where it forms part of the central protuberance. In the 70S ribosome it contacts protein S13 of the 30S subunit (bridge B1b), connecting the 2 subunits; this bridge is implicated in subunit movement. Contacts the P site tRNA; the 5S rRNA and some of its associated pr…	Ribonucleoprotein;Ribosomal protein;RNA-binding;rRNA-binding;tRNA-binding	translation [GO:0006412]	rRNA binding [GO:0019843]; structural constituent of ribosome [GO:0003735]; tRNA binding [GO:0000049]	ribonucleoprotein complex [GO:1990904]; ribosome [GO:0005840]		499.934	444.138	413.701	396.022	408.768	410.507	382.204	408.842	527.348	419.741	636.926	500.699	H. pylori
I0ZIA1	NCTC11637_00393	A0A2X4ZX41_HELPX;I0ZIA1_HELPX	I0ZIA1	DUF1882 domain-containing protein	HP17_06607							92.2244	98.8148	57.6994	92.5931	92.2066	92.8959	46.7359	77.2225	50.8837	92.8008	111.095	NaN	H. pylori
A0A2X4ZX98	metK	A0A2X4ZX98_HELPX	A0A2X4ZX98	S-adenosylmethionine synthase (AdoMet synthase) (EC 2.5.1.6) (MAT) (Methionine adenosyltransferase)	metK NCTC11637_00433	FUNCTION: Catalyzes the formation of S-adenosylmethionine (AdoMet) from methionine and ATP. The overall synthetic reaction is composed of two sequential steps, AdoMet formation and the subsequent tripolyphosphate hydrolysis which occurs prior to release of AdoMet from the enzyme. {ECO:0000256|HAMAP-Rule:MF_00086}.	ATP-binding;Cytoplasm;Magnesium;Metal-binding;Nucleotide-binding;One-carbon metabolism;Potassium;Transferase	one-carbon metabolic process [GO:0006730]; S-adenosylmethionine biosynthetic process [GO:0006556]	ATP binding [GO:0005524]; magnesium ion binding [GO:0000287]; methionine adenosyltransferase activity [GO:0004478]	cytoplasm [GO:0005737]	PATHWAY: Amino-acid biosynthesis; S-adenosyl-L-methionine biosynthesis; S-adenosyl-L-methionine from L-methionine: step 1/1. {ECO:0000256|ARBA:ARBA00005224, ECO:0000256|HAMAP-Rule:MF_00086}.	155.702	142.149	134.999	144.611	142.754	137.9	124.933	149.133	165.729	175.398	220.01	203.607	H. pylori
I0ZI77	htpG	A0A2X4ZXB8_HELPX;I0ZI77_HELPX	I0ZI77	Chaperone protein HtpG (Heat shock protein HtpG) (High temperature protein G)	htpG HP17_06742	FUNCTION: Molecular chaperone. Has ATPase activity. {ECO:0000256|HAMAP-Rule:MF_00505}.	ATP-binding;Chaperone;Cytoplasm;Nucleotide-binding;Stress response		ATP binding [GO:0005524]; ATP hydrolysis activity [GO:0016887]; ATP-dependent protein folding chaperone [GO:0140662]; unfolded protein binding [GO:0051082]	cytoplasm [GO:0005737]		NaN	119.995	NaN	154.174	118.606	82.5414	63.4614	NaN	NaN	155.03	NaN	182.752	H. pylori
I0ZD75	atpH	A0A2X4ZXJ6_HELPX;I0ZD75_HELPX	I0ZD75	F0F1 ATP synthase subunit delta (EC 3.6.3.14)	HP17_03549		ATP synthesis;CF(1);Hydrogen ion transport;Hydrolase;Ion transport;Membrane;Transport		hydrolase activity [GO:0016787]; proton-transporting ATP synthase activity, rotational mechanism [GO:0046933]	proton-transporting ATP synthase complex, catalytic core F(1) [GO:0045261]		NaN	86.4273	62.4046	41.2141	NaN	49.0928	84.8609	57.3614	53.9605	NaN	49.1505	NaN	H. pylori
I0ZD66	pal	A0A2X4ZXN5_HELPX;I0ZD66_HELPX	I0ZD66	Peptidoglycan-associated lipoprotein	HP17_03504		Lipoprotein;Membrane;Signal			membrane [GO:0016020]		560.508	637.062	539.523	798.461	530.06	624.893	456.648	496.047	458.132	448.832	566.258	563.799	H. pylori
I0ZH88	rplI	A0A2X4ZYJ0_HELPX;I0ZH88_HELPX	I0ZH88	50S ribosomal protein L9	rplI HP17_07587	FUNCTION: Binds to the 23S rRNA. {ECO:0000256|HAMAP-Rule:MF_00503}.	Ribonucleoprotein;Ribosomal protein;RNA-binding;rRNA-binding	translation [GO:0006412]	rRNA binding [GO:0019843]; structural constituent of ribosome [GO:0003735]	ribonucleoprotein complex [GO:1990904]; ribosome [GO:0005840]		NaN	60.336	120.54	153.201	49.3136	41.6148	39.6959	39.9101	83.4371	NaN	94.2473	NaN	H. pylori
A0A2X4ZYM9	rplD	A0A2X4ZYM9_HELPX	A0A2X4ZYM9	50S ribosomal protein L4	rplD NCTC11637_00488	FUNCTION: Forms part of the polypeptide exit tunnel. {ECO:0000256|HAMAP-Rule:MF_01328}.; FUNCTION: One of the primary rRNA binding proteins, this protein initially binds near the 5'-end of the 23S rRNA. It is important during the early stages of 50S assembly. It makes multiple contacts with different domains of the 23S rRNA in the assembled 50S subunit and ribosome. {ECO:0000256|HAMAP-Rule:MF_013…	Ribonucleoprotein;Ribosomal protein;RNA-binding;rRNA-binding	translation [GO:0006412]	rRNA binding [GO:0019843]; structural constituent of ribosome [GO:0003735]	ribonucleoprotein complex [GO:1990904]; ribosome [GO:0005840]		36.9227	13.1613	19.7516	21.6081	9.09618	9.65261	28.6992	13.3856	26.1629	NaN	NaN	59.1821	H. pylori
A0A2X4ZZ19	adk	A0A2X4ZZ19_HELPX	A0A2X4ZZ19	Adenylate kinase (AK) (EC 2.7.4.3) (ATP-AMP transphosphorylase) (ATP:AMP phosphotransferase) (Adenylate monophosphate kinase)	adk NCTC11637_00840	FUNCTION: Catalyzes the reversible transfer of the terminal phosphate group between ATP and AMP. Plays an important role in cellular energy homeostasis and in adenine nucleotide metabolism. {ECO:0000256|HAMAP-Rule:MF_00235}.	ATP-binding;Cytoplasm;Kinase;Nucleotide biosynthesis;Nucleotide-binding;Transferase	AMP salvage [GO:0044209]; phosphorylation [GO:0016310]	adenylate kinase activity [GO:0004017]; ATP binding [GO:0005524]	cytoplasm [GO:0005737]	PATHWAY: Purine metabolism; AMP biosynthesis via salvage pathway; AMP from ADP: step 1/1. {ECO:0000256|HAMAP-Rule:MF_00235}.	NaN	NaN	NaN	108.608	88.615	NaN	72.9219	NaN	125.236	NaN	NaN	NaN	H. pylori
I0ZDV4	fusA	A0A2X5A027_HELPX;I0ZDV4_HELPX	I0ZDV4	Elongation factor G (EF-G)	fusA HP17_02902	FUNCTION: Catalyzes the GTP-dependent ribosomal translocation step during translation elongation. During this step, the ribosome changes from the pre-translocational (PRE) to the post-translocational (POST) state as the newly formed A-site-bound peptidyl-tRNA and P-site-bound deacylated tRNA move to the P and E sites, respectively. Catalyzes the coordinated movement of the two tRNA molecules, the…	Cytoplasm;Elongation factor;GTP-binding;Nucleotide-binding;Protein biosynthesis		GTP binding [GO:0005525]; GTPase activity [GO:0003924]; guanosine tetraphosphate binding [GO:0097216]; translation elongation factor activity [GO:0003746]	cytoplasm [GO:0005737]		18.1187	24.951	32.328	35.4738	30.1825	51.354	23.1566	35.0876	44.675	31.7681	25.2258	29.7917	H. pylori
I0ZIP4	atoE	A0A2X5A052_HELPX;I0ZIP4_HELPX	I0ZIP4	Short-chain fatty acids transporter	HP17_06377		Membrane;Transmembrane;Transmembrane helix			membrane [GO:0016020]		NaN	NaN	192.25	281.847	221.005	312.812	130.993	NaN	206.661	NaN	NaN	NaN	H. pylori
I0ZIE0	ansB	A0A2X5A091_HELPX;I0ZIE0_HELPX	I0ZIE0	L-asparaginase II	HP17_06582		Hydrolase	asparagine metabolic process [GO:0006528]	asparaginase activity [GO:0004067]	cellular anatomical entity [GO:0110165]		NaN	NaN	NaN	105.299	116.414	NaN	NaN	NaN	NaN	NaN	NaN	NaN	H. pylori
A0A2X5A0M6	dnaN	A0A2X5A0M6_HELPX	A0A2X5A0M6	Beta sliding clamp (Beta-clamp processivity factor) (DNA polymerase III beta sliding clamp subunit)	dnaN NCTC11637_00715		Cytoplasm;DNA replication;DNA-binding;DNA-directed DNA polymerase;Nucleotidyltransferase;Transferase	DNA replication [GO:0006260]	3'-5' exonuclease activity [GO:0008408]; DNA binding [GO:0003677]; DNA-directed DNA polymerase activity [GO:0003887]	cytoplasm [GO:0005737]; DNA polymerase III complex [GO:0009360]		NaN	36.0491	NaN	46.6252	86.361	118.962	77.3565	71.4595	125.223	86.2492	64.2817	NaN	H. pylori
I0ZGP8	spoT	A0A2X5A0N4_HELPX;I0ZGP8_HELPX	I0ZGP8	Guanosine-3', 5'-bis(Diphosphate)3'-pyrophosphohydrolase	HP17_08059	FUNCTION: In eubacteria ppGpp (guanosine 3'-diphosphate 5'-diphosphate) is a mediator of the stringent response that coordinates a variety of cellular activities in response to changes in nutritional abundance. {ECO:0000256|RuleBase:RU003847}.	Hydrolase	guanosine tetraphosphate metabolic process [GO:0015969]	hydrolase activity [GO:0016787]			NaN	88.6111	59.7578	82.1526	42.7969	46.7598	33.8052	62.4384	71.8885	95.5254	NaN	NaN	H. pylori
A0A2X5A1G6	NCTC11637_00775	A0A2X5A1G6_HELPX	A0A2X5A1G6	Sialidase A (EC 3.2.1.18)	NCTC11637_00775		Glycosidase;Hydrolase;Membrane;Transmembrane;Transmembrane helix	metabolic process [GO:0008152]	DNA binding [GO:0003677]; exo-alpha-(2->3)-sialidase activity [GO:0052794]; exo-alpha-(2->6)-sialidase activity [GO:0052795]; exo-alpha-(2->8)-sialidase activity [GO:0052796]	membrane [GO:0016020]		NaN	NaN	NaN	22.8484	2.8246	10.4604	NaN	8.00421	10.8607	NaN	NaN	11.1543	H. pylori
A0A2X5A1S5	NCTC11637_00831	A0A2X5A1S5_HELPX	A0A2X5A1S5	Outer membrane protein	NCTC11637_00831							853.877	851.671	182.587	146.48	320.337	205.786	513.996	551.976	969.46	816.906	910.849	1295.58	H. pylori
A0A2X5A2A4	trxA_2	A0A2X5A2A4_HELPX	A0A2X5A2A4	Thioredoxin	trxA_2 NCTC11637_01050		Disulfide bond;Redox-active center		protein-disulfide reductase activity [GO:0015035]			NaN	2972.24	56196.4	1349.35	3006.5	2580.36	1199.71	1066.87	3552.1	2487.62	NaN	NaN	H. pylori
A0A2X5A2B3	ftnA	A0A2X5A2B3_HELPX	A0A2X5A2B3	Ferritin (EC 1.16.3.2)	ftnA NCTC11637_00878	FUNCTION: Iron-storage protein. {ECO:0000256|RuleBase:RU361145}.	Cytoplasm;Iron;Iron storage;Metal-binding;Oxidoreductase	intracellular iron ion homeostasis [GO:0006879]; iron ion transport [GO:0006826]	ferric iron binding [GO:0008199]; oxidoreductase activity [GO:0016491]	cytoplasm [GO:0005737]		208.089	204.378	175.553	563.021	479.89	433.902	251.817	270.368	276.209	311.91	368.605	329.808	H. pylori
A0A2X5A2J1	omp9	A0A2X5A2J1_HELPX	A0A2X5A2J1	Outer membrane protein 9	omp9 NCTC11637_00897		Signal					103.503	136.593	101.521	141.805	136.471	93.1126	108.457	133.588	161.331	138.927	176.885	193.218	H. pylori
A0A2X5A2R9	katA	A0A2X5A2R9_HELPX	A0A2X5A2R9	Catalase (EC 1.11.1.6)	katA NCTC11637_01097		Heme;Hydrogen peroxide;Iron;Metal-binding;Oxidoreductase;Peroxidase	hydrogen peroxide catabolic process [GO:0042744]; response to oxidative stress [GO:0006979]	catalase activity [GO:0004096]; heme binding [GO:0020037]; metal ion binding [GO:0046872]			147.494	132.264	121.221	539.923	546.562	322.843	206.764	195.678	175.009	199.363	186.131	143.071	H. pylori
I0ZCP4	frpB	A0A2X5A3M4_HELPX;I0ZCP4_HELPX	I0ZCP4	Iron-regulated outer membrane protein	HP17_04039		Cell outer membrane;Membrane;Signal;TonB box;Transmembrane;Transmembrane beta strand;Transport			cell outer membrane [GO:0009279]		227.281	206.962	202.277	116.114	123.057	123.952	106.722	91.6869	155.415	178.789	184.896	80.891	H. pylori
A0A2X5A4H8	tsaA	A0A2X5A4H8_HELPX	A0A2X5A4H8	Alkyl hydroperoxide reductase C (EC 1.11.1.26) (Peroxiredoxin) (Thioredoxin peroxidase)	tsaA NCTC11637_00171		Oxidoreductase;Peroxidase		NADH-dependent peroxiredoxin activity [GO:0102039]			116.11	88.0968	88.5439	360.132	296.476	191.56	123.275	109.708	121.907	119.35	121.325	120.195	H. pylori
A0A2X5A4J0	fbcC	A0A2X5A4J0_HELPX	A0A2X5A4J0	Ubiquinol-cytochrome c reductase cytochrome c1 subunit (EC 1.10.2.2)	fbcC NCTC11637_00147		Heme;Iron;Membrane;Metal-binding;Oxidoreductase;Transmembrane;Transmembrane helix		electron transfer activity [GO:0009055]; heme binding [GO:0020037]; metal ion binding [GO:0046872]	membrane [GO:0016020]		230.865	332.459	319.9	334.201	262.86	290.612	212.373	226.064	145.903	379.416	255.922	132.495	H. pylori
A0A2X5A4U2	hup	A0A2X5A4U2_HELPX	A0A2X5A4U2	DNA-binding protein HU	hup NCTC11637_01061		DNA-binding		DNA binding [GO:0003677]; structural constituent of chromatin [GO:0030527]			398.491	128.195	211.996	1369.54	617.185	524.567	248.815	238.467	246.417	220.682	289.363	NaN	H. pylori
A0A2X5A5T7	tpx	A0A2X5A5T7_HELPX	A0A2X5A5T7	Thiol peroxidase (Tpx) (EC 1.11.1.24) (Peroxiredoxin tpx) (Prx) (Thioredoxin peroxidase) (Thioredoxin-dependent peroxiredoxin)	tpx NCTC11637_01262	FUNCTION: Thiol-specific peroxidase that catalyzes the reduction of hydrogen peroxide and organic hydroperoxides to water and alcohols, respectively. Plays a role in cell protection against oxidative stress by detoxifying peroxides. {ECO:0000256|HAMAP-Rule:MF_00269}.	Antioxidant;Disulfide bond;Oxidoreductase;Peroxidase;Redox-active center		thioredoxin peroxidase activity [GO:0008379]			NaN	44.3962	NaN	26.1725	22.7628	29.5779	19.8226	3.59785	18.751	4.62047	NaN	NaN	H. pylori
I0ZJA1	galE	A0A2X5A6K5_HELPX;I0ZJA1_HELPX	I0ZJA1	UDP-glucose 4-epimerase (EC 5.1.3.2)	HP17_00425		Carbohydrate metabolism;Isomerase;NAD	galactose metabolic process [GO:0006012]	UDP-glucose 4-epimerase activity [GO:0003978]		PATHWAY: Carbohydrate metabolism; galactose metabolism. {ECO:0000256|ARBA:ARBA00004947, ECO:0000256|RuleBase:RU366046}.	29.9008	39.9387	60.2273	26.9439	55.3319	58.2109	51.9907	54.9999	69.7017	51.9965	57.5654	49.7686	H. pylori
I0ZHK2	katA1	A0A2X5A6P1_HELPX;I0ZHK2_HELPX	I0ZHK2	Catalase-related peroxidase (EC 1.11.1.-)	HP17_07139	FUNCTION: Has an organic peroxide-dependent peroxidase activity. {ECO:0000256|PIRNR:PIRNR000296}.	Heme;Iron;Metal-binding;Oxidoreductase;Peroxidase;Signal	response to oxidative stress [GO:0006979]	catalase activity [GO:0004096]; heme binding [GO:0020037]; metal ion binding [GO:0046872]			NaN	NaN	NaN	24.3094	18.26	NaN	15.6183	NaN	NaN	NaN	NaN	NaN	H. pylori
I0ZDS5	NCTC11637_00375	A0A2X5A7U3_HELPX;I0ZDS5_HELPX	I0ZDS5	Chemotaxis protein	HP17_00275							421.592	NaN	186.93	149.035	177.144	226.649	44.6437	544.989	194.555	529.105	811.218	799.211	H. pylori
I0ZEP0	cheY	A0A2X5A7X5_HELPX;I0ZEP0_HELPX	I0ZEP0	Chemotactic response regulator, two-component system	HP17_02155		Phosphoprotein	phosphorelay signal transduction system [GO:0000160]				NaN	NaN	NaN	1248.62	753.928	NaN	NaN	519.127	NaN	NaN	NaN	NaN	H. pylori
I0ZCC6	fbcF	A0A2X5A7Y8_HELPX;I0ZCC6_HELPX	I0ZCC6	Ubiquinol-cytochrome c reductase, iron-sulfur subunit	HP17_04306		2Fe-2S;Disulfide bond;Iron;Iron-sulfur;Membrane;Metal-binding;Transmembrane;Transmembrane helix		2 iron, 2 sulfur cluster binding [GO:0051537]; metal ion binding [GO:0046872]	cytoplasm [GO:0005737]; intracellular membrane-bounded organelle [GO:0043231]; membrane [GO:0016020]		114.823	110.736	91.2127	144.142	128.142	83.1474	100.992	108.471	124.335	NaN	111.15	NaN	H. pylori
I0ZGF0	fba	A0A2X5A820_HELPX;I0ZGF0_HELPX	I0ZGF0	Fructose-bisphosphate aldolase (EC 4.1.2.13)	HP17_08339		Lyase;Metal-binding;Zinc	fructose 1,6-bisphosphate metabolic process [GO:0030388]; glycolytic process [GO:0006096]	fructose-bisphosphate aldolase activity [GO:0004332]; zinc ion binding [GO:0008270]			137.161	225.652	177.056	227.568	175.523	230.087	162.652	185.701	213.212	178.491	206.976	239.285	H. pylori
A0A2X5A8P2	groL3	A0A2X5A8P2_HELPX	A0A2X5A8P2	Chaperonin GroEL (EC 5.6.1.7) (60 kDa chaperonin) (Chaperonin-60) (Cpn60)	groL3 groEL groL NCTC11637_00211	FUNCTION: Together with its co-chaperonin GroES, plays an essential role in assisting protein folding. The GroEL-GroES system forms a nano-cage that allows encapsulation of the non-native substrate proteins and provides a physical environment optimized to promote and accelerate protein folding. {ECO:0000256|HAMAP-Rule:MF_00600, ECO:0000256|RuleBase:RU000419}.	ATP-binding;Chaperone;Cytoplasm;Isomerase;Nucleotide-binding;Stress response	protein refolding [GO:0042026]	ATP binding [GO:0005524]; ATP-dependent protein folding chaperone [GO:0140662]; isomerase activity [GO:0016853]; unfolded protein binding [GO:0051082]	cytoplasm [GO:0005737]		76.5642	59.186	58.4145	308.914	196.957	135.249	82.4508	74.1858	94.1899	80.546	67.2532	79.1389	H. pylori
A0A2X5A997	fumC	A0A2X5A997_HELPX	A0A2X5A997	Fumarate hydratase class II (Fumarase C) (EC 4.2.1.2) (Aerobic fumarase) (Iron-independent fumarase)	fumC NCTC11637_00480	FUNCTION: Involved in the TCA cycle. Catalyzes the stereospecific interconversion of fumarate to L-malate. {ECO:0000256|HAMAP-Rule:MF_00743}.	Cytoplasm;Lyase;Tricarboxylic acid cycle	fumarate metabolic process [GO:0006106]; tricarboxylic acid cycle [GO:0006099]	fumarate hydratase activity [GO:0004333]	tricarboxylic acid cycle enzyme complex [GO:0045239]	PATHWAY: Carbohydrate metabolism; tricarboxylic acid cycle; (S)-malate from fumarate: step 1/1. {ECO:0000256|HAMAP-Rule:MF_00743}.	104.336	148.747	128.919	180.891	150.085	178.212	105.646	136.213	139.549	138.842	158.79	144.935	H. pylori
I0ZBW9	gsp	A0A2X5A9V8_HELPX;I0ZBW9_HELPX	I0ZBW9	Glutathionylspermidine synthase pre-ATP-grasp-like domain-containing protein	HP17_04846							NaN	NaN	NaN	162.178	NaN	NaN	NaN	NaN	NaN	NaN	NaN	NaN	H. pylori
I0ZFC8	yceI	A0A2X5AAB9_HELPX;I0ZFC8_HELPX	I0ZFC8	Lipid/polyisoprenoid-binding YceI-like domain-containing protein	HP17_01473		Signal					NaN	NaN	NaN	119.393	63.489	53.5761	34.0065	25.3939	NaN	NaN	NaN	NaN	H. pylori
I0ZIA9	fabI	A0A2X5AC02_HELPX;I0ZIA9_HELPX	I0ZIA9	Enoyl-[acyl-carrier-protein] reductase [NADH] (EC 1.3.1.9)	HP17_06657		Fatty acid biosynthesis;Fatty acid metabolism;Lipid biosynthesis;Lipid metabolism;NAD;Oxidoreductase	fatty acid biosynthetic process [GO:0006633]	enoyl-[acyl-carrier-protein] reductase (NADH) activity [GO:0004318]; enoyl-[acyl-carrier-protein] reductase activity [GO:0016631]		PATHWAY: Lipid metabolism; fatty acid biosynthesis. {ECO:0000256|ARBA:ARBA00005194}.	NaN	226.242	203.053	172.683	177.596	168.968	131.268	179.822	NaN	NaN	393.187	432.45	H. pylori
A0A2X5AC24	lon1	A0A2X5AC24_HELPX	A0A2X5AC24	Lon protease (EC 3.4.21.53) (ATP-dependent protease La)	lon1 lon NCTC11637_01601	FUNCTION: ATP-dependent serine protease that mediates the selective degradation of mutant and abnormal proteins as well as certain short-lived regulatory proteins. Required for cellular homeostasis and for survival from DNA damage and developmental changes induced by stress. Degrades polypeptides processively to yield small peptide fragments that are 5 to 10 amino acids long. Binds to DNA in a do…	ATP-binding;Cytoplasm;Hydrolase;Nucleotide-binding;Protease;Serine protease;Stress response	cellular response to heat [GO:0034605]; protein quality control for misfolded or incompletely synthesized proteins [GO:0006515]	ATP binding [GO:0005524]; ATP hydrolysis activity [GO:0016887]; ATP-dependent peptidase activity [GO:0004176]; sequence-specific DNA binding [GO:0043565]; serine-type endopeptidase activity [GO:0004252]	cytoplasm [GO:0005737]		NaN	103.85	103.973	105.504	171.411	140.593	95.2486	114.792	137.617	296.833	57.3227	106.907	H. pylori
A0A2X5AC78	NCTC11637_00820	A0A2X5AC78_HELPX	A0A2X5AC78	Tumor necrosis factor alpha-inducing protein	NCTC11637_00820							156.325	167.948	130.625	170.46	139.212	143.271	115.263	131.947	150.021	170.379	177.814	167.966	H. pylori
I0ZB41	oorA	A0A2X5ACE2_HELPX;I0ZB41_HELPX	I0ZB41	2-oxoglutarate-acceptor oxidoreductase subunit OorA	oorA HP17_05665				oxidoreductase activity [GO:0016491]			NaN	42.5372	21.4389	80.8358	74.373	95.0862	61.9223	58.9113	68.1789	63.3639	120.654	NaN	H. pylori
I0ZB30	bdlA_2	A0A2X5ACF2_HELPX;I0ZB30_HELPX	I0ZB30	Methyl-accepting chemotaxis transmembrane sensory protein (MCP-like protein)	HP17_05610		Coiled coil;Membrane;Transducer;Transmembrane	signal transduction [GO:0007165]		membrane [GO:0016020]		158.703	155.958	142.073	214.89	174.751	211.193	143.271	168.294	172.778	187.35	217.096	167.836	H. pylori
A0A2X5ACG5	mdaB	A0A2X5ACG5_HELPX	A0A2X5ACG5	Putative drug activity modulator protein	mdaB NCTC11637_00854							339.533	289.291	292.429	361.906	314.635	337.016	241.287	272.233	219.772	445.804	288.635	291.112	H. pylori
I0ZCF4	adhA	A0A2X5ACY6_HELPX;I0ZCF4_HELPX	I0ZCF4	NADP-dependent alcohol dehydrogenase	HP17_00370		Metal-binding;Oxidoreductase;Zinc		oxidoreductase activity, acting on the CH-OH group of donors, NAD or NADP as acceptor [GO:0016616]; zinc ion binding [GO:0008270]			187.77	179.009	171.713	239.218	204.936	236.379	173.829	191.949	182.991	223.009	185.459	229.079	H. pylori
I0ZIW5	hemN_2	A0A2X5AD61_HELPX;I0ZIW5_HELPX	I0ZIW5	Coproporphyrinogen-III oxidase (EC 1.3.98.3)	HP17_06227	FUNCTION: Involved in the heme biosynthesis. Catalyzes the anaerobic oxidative decarboxylation of propionate groups of rings A and B of coproporphyrinogen III to yield the vinyl groups in protoporphyrinogen IX. {ECO:0000256|ARBA:ARBA00024295}.	4Fe-4S;Cytoplasm;Iron;Iron-sulfur;Metal-binding;Oxidoreductase;Porphyrin biosynthesis;S-adenosyl-L-methionine	protoporphyrinogen IX biosynthetic process [GO:0006782]	4 iron, 4 sulfur cluster binding [GO:0051539]; coproporphyrinogen dehydrogenase activity [GO:0051989]; coproporphyrinogen oxidase activity [GO:0004109]; metal ion binding [GO:0046872]	cytoplasm [GO:0005737]	PATHWAY: Porphyrin-containing compound metabolism; protoporphyrin-IX biosynthesis; protoporphyrinogen-IX from coproporphyrinogen-III (AdoMet route): step 1/1. {ECO:0000256|ARBA:ARBA00004785, ECO:0000256|PIRNR:PIRNR000167}.	184.167	224.34	148.708	243.373	148.208	241.732	129.866	130.456	102.305	124.746	120.26	234.742	H. pylori
A0A2X5AD93	NCTC11637_01221	A0A2X5AD93_HELPX	A0A2X5AD93	RloF like protein	NCTC11637_01221							215.637	235.101	163.673	190.423	213.219	205.328	106.278	119.896	146.503	195.198	180.121	272.769	H. pylori
I0ZF59	rplC	A0A2X5ADA5_HELPX;I0ZF59_HELPX	I0ZF59	50S ribosomal protein L3	rplC HP17_01658	FUNCTION: One of the primary rRNA binding proteins, it binds directly near the 3'-end of the 23S rRNA, where it nucleates assembly of the 50S subunit. {ECO:0000256|ARBA:ARBA00002570}.	Ribonucleoprotein;Ribosomal protein	translation [GO:0006412]	structural constituent of ribosome [GO:0003735]	ribonucleoprotein complex [GO:1990904]; ribosome [GO:0005840]		154.552	149.107	147.597	152.731	132.212	126.793	135.751	123.054	177.367	164.422	170.947	169.683	H. pylori
I0ZGY0	prsA	A0A2X5ADB3_HELPX;I0ZGY0_HELPX	I0ZGY0	Ribose-phosphate pyrophosphokinase (RPPK) (EC 2.7.6.1) (5-phospho-D-ribosyl alpha-1-diphosphate synthase) (Phosphoribosyl diphosphate synthase) (Phosphoribosyl pyrophosphate synthase) (P-Rib-PP synthase) (PRPP synthase) (PRPPase)	prs HP17_07882	FUNCTION: Involved in the biosynthesis of the central metabolite phospho-alpha-D-ribosyl-1-pyrophosphate (PRPP) via the transfer of pyrophosphoryl group from ATP to 1-hydroxyl of ribose-5-phosphate (Rib-5-P). {ECO:0000256|HAMAP-Rule:MF_00583}.	ATP-binding;Cytoplasm;Kinase;Magnesium;Metal-binding;Nucleotide biosynthesis;Nucleotide-binding;Transferase	5-phosphoribose 1-diphosphate biosynthetic process [GO:0006015]; nucleotide biosynthetic process [GO:0009165]; phosphorylation [GO:0016310]; ribonucleoside monophosphate biosynthetic process [GO:0009156]	ATP binding [GO:0005524]; kinase activity [GO:0016301]; magnesium ion binding [GO:0000287]; ribose phosphate diphosphokinase activity [GO:0004749]	cytoplasm [GO:0005737]	PATHWAY: Metabolic intermediate biosynthesis; 5-phospho-alpha-D-ribose 1-diphosphate biosynthesis; 5-phospho-alpha-D-ribose 1-diphosphate from D-ribose 5-phosphate (route I): step 1/1. {ECO:0000256|HAMAP-Rule:MF_00583}.	NaN	136.43	94.6289	113.363	114.367	102.56	85.392	138.102	150.728	88.7722	NaN	74.346	H. pylori
I0ZIH8	znuA	A0A2X5ADH5_HELPX;I0ZIH8_HELPX	I0ZIH8	Zinc ABC transporter substrate-binding protein	HP17_06562		Signal					NaN	164.45	166.963	230.454	105.947	154.82	117.472	118.298	127.473	NaN	168.752	NaN	H. pylori
I0ZGQ0	pyrH	A0A2X5ADI2_HELPX;I0ZGQ0_HELPX	I0ZGQ0	Uridylate kinase (UK) (EC 2.7.4.22) (Uridine monophosphate kinase) (UMP kinase) (UMPK)	pyrH HP17_08069	FUNCTION: Catalyzes the reversible phosphorylation of UMP to UDP. {ECO:0000256|HAMAP-Rule:MF_01220}.	ATP-binding;Cytoplasm;Kinase;Nucleotide-binding;Pyrimidine biosynthesis;Transferase	'de novo' CTP biosynthetic process [GO:0044210]; phosphorylation [GO:0016310]	ATP binding [GO:0005524]; UMP kinase activity [GO:0033862]	cytoplasm [GO:0005737]	PATHWAY: Pyrimidine metabolism; CTP biosynthesis via de novo pathway; UDP from UMP (UMPK route): step 1/1. {ECO:0000256|ARBA:ARBA00004791, ECO:0000256|HAMAP-Rule:MF_01220}.	NaN	217.245	175.468	274.745	230.692	187.914	298.494	220.792	382.272	368.907	358.751	352.89	H. pylori
I0ZEK9	flhF	A0A2X5ADU1_HELPX;I0ZEK9_HELPX	I0ZEK9	Flagellar biosynthesis protein FlhF (Flagella-associated GTP-binding protein)	flhF HP17_02327	FUNCTION: Necessary for flagellar biosynthesis. May be involved in translocation of the flagellum. {ECO:0000256|ARBA:ARBA00025337}.	Bacterial flagellum biogenesis;Bacterial flagellum protein export;Cell membrane;Cell projection;Cilium;Coiled coil;Flagellum;GTP-binding;Membrane;Nucleotide-binding;Protein transport;Transport	bacterial-type flagellum organization [GO:0044781]; SRP-dependent cotranslational protein targeting to membrane [GO:0006614]	GTP binding [GO:0005525]; GTPase activity [GO:0003924]	plasma membrane [GO:0005886]		164.251	59.8642	103.483	79.2061	97.3674	86.6972	89.5027	71.5723	164.918	NaN	429.827	168.087	H. pylori
I0ZHE4	rpsA	A0A2X5AEK0_HELPX;I0ZHE4_HELPX	I0ZHE4	30S ribosomal protein S1	rpsA HP17_07337		Repeat;Ribonucleoprotein;Ribosomal protein	translation [GO:0006412]	RNA binding [GO:0003723]; structural constituent of ribosome [GO:0003735]	ribosome [GO:0005840]		200.617	187.512	250.582	300.929	254.881	245.603	179.404	195.96	204.279	213.524	NaN	182.129	H. pylori
I0ZHF1	cheA	A0A2X5AET3_HELPX;I0ZHF1_HELPX	I0ZHF1	histidine kinase (EC 2.7.13.3)	HP17_07372		Kinase;Phosphoprotein;Transferase	chemotaxis [GO:0006935]	phosphorelay sensor kinase activity [GO:0000155]	cytoplasm [GO:0005737]		53.3397	137.187	125.261	83.2443	83.7845	89.3466	75.4045	53.4598	NaN	NaN	99.0454	93.7658	H. pylori
A0A2X5AF74	vacA_2	A0A2X5AF74_HELPX	A0A2X5AF74	Vacuolating cytotoxin autotransporter	vacA_2 NCTC11637_01106	FUNCTION: Induces vacuolation of eukaryotic cells. Causes ulceration and gastric lesions. {ECO:0000256|ARBA:ARBA00002940}.	Signal;Toxin;Virulence		toxin activity [GO:0090729]	cell outer membrane [GO:0009279]; cell surface [GO:0009986]; extracellular region [GO:0005576]; periplasmic space [GO:0042597]		NaN	NaN	139.262	167.432	NaN	NaN	178.591	217.725	NaN	NaN	163.276	196.879	H. pylori
A0A2X5AFH5	guaB	A0A2X5AFH5_HELPX	A0A2X5AFH5	Inosine-5'-monophosphate dehydrogenase (IMP dehydrogenase) (IMPD) (IMPDH) (EC 1.1.1.205)	guaB NCTC11637_01055	FUNCTION: Catalyzes the conversion of inosine 5'-phosphate (IMP) to xanthosine 5'-phosphate (XMP), the first committed and rate-limiting step in the de novo synthesis of guanine nucleotides, and therefore plays an important role in the regulation of cell growth. {ECO:0000256|HAMAP-Rule:MF_01964}.	CBS domain;GMP biosynthesis;Metal-binding;NAD;Oxidoreductase;Potassium;Purine biosynthesis	GMP biosynthetic process [GO:0006177]	IMP dehydrogenase activity [GO:0003938]; metal ion binding [GO:0046872]; nucleotide binding [GO:0000166]		PATHWAY: Purine metabolism; XMP biosynthesis via de novo pathway; XMP from IMP: step 1/1. {ECO:0000256|HAMAP-Rule:MF_01964, ECO:0000256|RuleBase:RU003928}.	38.0567	16.8535	37.9746	51.7704	32.7695	27.9733	28.8484	43.825	34.4699	54.9709	43.0513	42.1433	H. pylori
A0A2X5AFN5	hldD	A0A2X5AFN5_HELPX	A0A2X5AFN5	ADP-glyceromanno-heptose 6-epimerase (EC 5.1.3.20)	hldD NCTC11637_01081		Carbohydrate metabolism;Isomerase	carbohydrate metabolic process [GO:0005975]	ADP-glyceromanno-heptose 6-epimerase activity [GO:0008712]; NADP binding [GO:0050661]			NaN	103.252	114.672	121.935	71.8939	100.759	104.724	121.401	156.312	162.217	143.38	122.982	H. pylori
A0A2X5AFR2	zwf	A0A2X5AFR2_HELPX	A0A2X5AFR2	Glucose-6-phosphate 1-dehydrogenase (G6PD) (EC 1.1.1.49)	zwf NCTC11637_01306	FUNCTION: Catalyzes the oxidation of glucose 6-phosphate to 6-phosphogluconolactone. {ECO:0000256|HAMAP-Rule:MF_00966}.	Carbohydrate metabolism;Glucose metabolism;NADP;Oxidoreductase	glucose metabolic process [GO:0006006]; pentose-phosphate shunt [GO:0006098]	glucose-6-phosphate dehydrogenase activity [GO:0004345]; NADP binding [GO:0050661]		PATHWAY: Carbohydrate degradation; pentose phosphate pathway; D-ribulose 5-phosphate from D-glucose 6-phosphate (oxidative stage): step 1/3. {ECO:0000256|HAMAP-Rule:MF_00966}.	NaN	NaN	NaN	266.062	217.614	196.476	179.397	263.373	NaN	NaN	NaN	NaN	H. pylori
I0ZCE8	porA	A0A2X5AFR7_HELPX;I0ZCE8_HELPX	I0ZCE8	Pyruvate flavodoxin oxidoreductase subunit alpha	porA HP17_00340		Pyruvate		oxidoreductase activity [GO:0016491]			197.804	204.011	173.137	286.294	237.119	321.781	210.125	254.981	277.382	361.264	342.678	279.319	H. pylori
A0A2X5AFV8	NCTC11637_01138	A0A2X5AFV8_HELPX	A0A2X5AFV8	Outer membrane porin and adhesin HopC putative signal peptide	NCTC11637_01138		Signal					99.1236	123.721	116.721	87.1623	84.5046	97.147	103.455	72.165	79.8182	74.668	105.747	107.673	H. pylori
I0ZE94	vacA_3	A0A2X5AFY0_HELPX;I0ZE94_HELPX	I0ZE94	Vacuolating cytotoxin VacA-like protein	HP17_02479		Virulence					NaN	18.5025	12.9551	6.45584	NaN	14.5236	NaN	NaN	NaN	NaN	14.7638	NaN	H. pylori
A0A2X5AG92	degP	A0A2X5AG92_HELPX	A0A2X5AG92	Serine protease (EC 3.4.21.107)	degP NCTC11637_01360		Hydrolase;Protease;Repeat;Signal	proteolysis [GO:0006508]	serine-type endopeptidase activity [GO:0004252]	periplasmic space [GO:0042597]		333.219	209.695	215.589	272.685	540.327	219.478	140.38	164.448	197.83	241.125	343.559	379.834	H. pylori
I0ZBV2	hopF	A0A2X5AGK1_HELPX;I0ZBV2_HELPX	I0ZBV2	Outer membrane protein HopF	HP17_04953		Signal					93.9968	135.46	131.084	130.07	130.351	111.701	99.5783	113.085	147.149	149.035	179.012	199.708	H. pylori
A0A2X5AGL5	deaD	A0A2X5AGL5_HELPX	A0A2X5AGL5	ATP-dependent RNA helicase (EC 2.7.7.-, EC 3.6.4.13)	deaD NCTC11637_01547		ATP-binding;Helicase;Hydrolase;Nucleotide-binding;Nucleotidyltransferase;Transferase		ATP binding [GO:0005524]; hydrolase activity [GO:0016787]; nucleic acid binding [GO:0003676]; nucleotidyltransferase activity [GO:0016779]; RNA helicase activity [GO:0003724]			149.621	174.906	172.604	232.724	193.206	257.881	168.085	304.938	203.059	270.206	NaN	288.429	H. pylori
A0A2X5AGP7	aroD	A0A2X5AGP7_HELPX	A0A2X5AGP7	3-dehydroquinate dehydratase (3-dehydroquinase) (EC 4.2.1.10) (Type II DHQase)	aroD aroQ NCTC11637_01379	FUNCTION: Catalyzes a trans-dehydration via an enolate intermediate. {ECO:0000256|ARBA:ARBA00003924, ECO:0000256|HAMAP-Rule:MF_00169}.	Amino-acid biosynthesis;Aromatic amino acid biosynthesis;Lyase	amino acid biosynthetic process [GO:0008652]; aromatic amino acid family biosynthetic process [GO:0009073]; chorismate biosynthetic process [GO:0009423]	3-dehydroquinate dehydratase activity [GO:0003855]		PATHWAY: Metabolic intermediate biosynthesis; chorismate biosynthesis; chorismate from D-erythrose 4-phosphate and phosphoenolpyruvate: step 3/7. {ECO:0000256|ARBA:ARBA00004902, ECO:0000256|HAMAP-Rule:MF_00169}.	197.18	139.112	120.343	281.586	210.345	199.19	122.125	126.021	153.921	124.125	171.693	276.976	H. pylori
A0A2X5AH55	xerC1	A0A2X5AH55_HELPX	A0A2X5AH55	Tyrosine recombinase XerH	xerC1 xerH NCTC11637_00900	FUNCTION: Site-specific tyrosine recombinase, which acts by catalyzing the cutting and rejoining of the recombining DNA molecules. {ECO:0000256|HAMAP-Rule:MF_02054}.	Cell cycle;Cell division;Cytoplasm;DNA integration;DNA recombination;DNA-binding	cell cycle [GO:0007049]; cell division [GO:0051301]; DNA recombination [GO:0006310]	DNA binding [GO:0003677]; tyrosine-based site-specific recombinase activity [GO:0009037]	cytoplasm [GO:0005737]		281.009	161.581	244.204	166.547	NaN	150.232	172.593	240.033	226.107	561.368	624.593	517.158	H. pylori
A0A2X5AHD7	omp11	A0A2X5AHD7_HELPX	A0A2X5AHD7	Outer membrane protein 11	omp11 NCTC11637_00933		Signal					NaN	76.5696	51.4479	64.5065	53.3322	56.1311	43.9326	54.8246	46.956	59.8234	74.0354	57.8244	H. pylori
I0ZEW7	pyrG	A0A2X5AHN3_HELPX;I0ZEW7_HELPX	I0ZEW7	CTP synthase (EC 6.3.4.2) (Cytidine 5'-triphosphate synthase) (Cytidine triphosphate synthetase) (CTP synthetase) (CTPS) (UTP--ammonia ligase)	pyrG HP17_01965	FUNCTION: Catalyzes the ATP-dependent amination of UTP to CTP with either L-glutamine or ammonia as the source of nitrogen. Regulates intracellular CTP levels through interactions with the four ribonucleotide triphosphates. {ECO:0000256|HAMAP-Rule:MF_01227}.	ATP-binding;Glutamine amidotransferase;Ligase;Magnesium;Metal-binding;Nucleotide-binding;Pyrimidine biosynthesis	'de novo' CTP biosynthetic process [GO:0044210]; glutamine metabolic process [GO:0006541]	ATP binding [GO:0005524]; CTP synthase activity [GO:0003883]; glutaminase activity [GO:0004359]; metal ion binding [GO:0046872]		PATHWAY: Pyrimidine metabolism; CTP biosynthesis via de novo pathway; CTP from UDP: step 2/2. {ECO:0000256|ARBA:ARBA00005171, ECO:0000256|HAMAP-Rule:MF_01227}.	94.5573	96.5577	86.0465	123.456	121.684	120.115	99.7603	126.736	138.264	164.392	103.575	237.982	H. pylori
A0A2X5AHR8	acnB	A0A2X5AHR8_HELPX	A0A2X5AHR8	Aconitate hydratase B (EC 4.2.1.3) (EC 4.2.1.99) (2-methylisocitrate dehydratase)	acnB NCTC11637_01005		4Fe-4S;Iron;Iron-sulfur;Lyase;Metal-binding;RNA-binding;Tricarboxylic acid cycle	tricarboxylic acid cycle [GO:0006099]	2-methylisocitrate dehydratase activity [GO:0047456]; 4 iron, 4 sulfur cluster binding [GO:0051539]; aconitate hydratase activity [GO:0003994]; citrate dehydratase activity [GO:0047780]; metal ion binding [GO:0046872]; RNA binding [GO:0003723]	cytosol [GO:0005829]	PATHWAY: Carbohydrate metabolism; tricarboxylic acid cycle; isocitrate from oxaloacetate: step 2/2. {ECO:0000256|ARBA:ARBA00004717, ECO:0000256|PIRNR:PIRNR036687}.; PATHWAY: Organic acid metabolism; propanoate degradation. {ECO:0000256|ARBA:ARBA00005026}.	152.091	134.763	97.3957	149.316	139.22	116.705	87.3367	71.575	110.59	203.926	205.187	191.373	H. pylori
I0ZG28	trxB	A0A2X5AJC1_HELPX;I0ZG28_HELPX	I0ZG28	Thioredoxin reductase (EC 1.8.1.9)	HP17_08616		Disulfide bond;FAD;Flavoprotein;NADP;Oxidoreductase;Redox-active center	removal of superoxide radicals [GO:0019430]	thioredoxin-disulfide reductase activity [GO:0004791]	cytoplasm [GO:0005737]		NaN	NaN	NaN	399.89	NaN	792.618	NaN	NaN	NaN	NaN	NaN	NaN	H. pylori
A0A2X5ALD1	lpxA	A0A2X5ALD1_HELPX	A0A2X5ALD1	Acyl-[acyl-carrier-protein]--UDP-N-acetylglucosamine O-acyltransferase (UDP-N-acetylglucosamine acyltransferase) (EC 2.3.1.129)	lpxA NCTC11637_01596	FUNCTION: Involved in the biosynthesis of lipid A, a phosphorylated glycolipid that anchors the lipopolysaccharide to the outer membrane of the cell. {ECO:0000256|HAMAP-Rule:MF_00387}.	Acyltransferase;Cytoplasm;Lipid A biosynthesis;Lipid biosynthesis;Lipid metabolism;Repeat;Transferase	lipid A biosynthetic process [GO:0009245]	acyl-[acyl-carrier-protein]-UDP-N-acetylglucosamine O-acyltransferase activity [GO:0008780]	cytoplasm [GO:0005737]	PATHWAY: Glycolipid biosynthesis; lipid IV(A) biosynthesis; lipid IV(A) from (3R)-3-hydroxytetradecanoyl-[acyl-carrier-protein] and UDP-N-acetyl-alpha-D-glucosamine: step 1/6. {ECO:0000256|HAMAP-Rule:MF_00387}.	NaN	136.317	NaN	121.414	108.849	113.065	98.1303	103.22	167.882	166.38	NaN	NaN	H. pylori
I0ZHF4	sodF	A0A2X5ANT8_HELPX;I0ZHF4_HELPX	I0ZHF4	Superoxide dismutase (EC 1.15.1.1)	HP17_07387	FUNCTION: Destroys radicals which are normally produced within the cells and which are toxic to biological systems. {ECO:0000256|RuleBase:RU000414}.	Metal-binding;Oxidoreductase		metal ion binding [GO:0046872]; superoxide dismutase activity [GO:0004784]			NaN	214.268	141.364	999.008	743.65	532.223	268.936	200.051	196.283	225.319	176.773	143.4	H. pylori
A0A2X5APK9	hofC	A0A2X5APK9_HELPX	A0A2X5APK9	Hof family outer membrane protein	hofC NCTC11637_01325		Signal					472.671	514.507	441.677	555.727	463.453	410.766	378.218	480.672	534.42	659.899	904.665	601.912	H. pylori
I0ZBL4	rplU	A0A2X5AT93_HELPX;I0ZBL4_HELPX	I0ZBL4	50S ribosomal protein L21	rplU HP17_05190	FUNCTION: This protein binds to 23S rRNA in the presence of protein L20. {ECO:0000256|HAMAP-Rule:MF_01363, ECO:0000256|RuleBase:RU000562}.	Ribonucleoprotein;Ribosomal protein;RNA-binding;rRNA-binding	translation [GO:0006412]	rRNA binding [GO:0019843]; structural constituent of ribosome [GO:0003735]	cytoplasm [GO:0005737]; ribonucleoprotein complex [GO:1990904]; ribosome [GO:0005840]		121.211	106.915	109.03	124.759	161.142	107.42	76.7839	104.477	127.322	140.145	184.558	157.433	H. pylori
A0A2X5ATB3	pgk	A0A2X5ATB3_HELPX	A0A2X5ATB3	Phosphoglycerate kinase (EC 2.7.2.3)	pgk NCTC11637_01571		ATP-binding;Cytoplasm;Glycolysis;Kinase;Nucleotide-binding;Transferase	glycolytic process [GO:0006096]; phosphorylation [GO:0016310]	ATP binding [GO:0005524]; phosphoglycerate kinase activity [GO:0004618]	cytoplasm [GO:0005737]	PATHWAY: Carbohydrate degradation; glycolysis; pyruvate from D-glyceraldehyde 3-phosphate: step 2/5. {ECO:0000256|HAMAP-Rule:MF_00145}.	183.793	207.898	164.638	172.817	178.517	198.331	151.214	166.828	208.518	203.868	240.087	235.967	H. pylori
I0ZHT3	gapB	A0A2X5ATK3_HELPX;I0ZHT3_HELPX	I0ZHT3	Glyceraldehyde-3-phosphate dehydrogenase	HP17_07067		NAD;Nucleotide-binding;Oxidoreductase	glucose metabolic process [GO:0006006]	NAD binding [GO:0051287]; NADP binding [GO:0050661]; oxidoreductase activity, acting on the aldehyde or oxo group of donors, NAD or NADP as acceptor [GO:0016620]			NaN	97.5549	70.131	107.573	96.0712	124.448	42.7959	69.9631	92.1196	68.8849	98.2775	79.5742	H. pylori
A0A2X5AU22	dps	A0A2X5AU22_HELPX	A0A2X5AU22	Neutrophil activating protein (EC 1.16.-.-, EC 1.16.3.1)	dps NCTC11637_01551		Coiled coil;Oxidoreductase		ferric iron binding [GO:0008199]; ferroxidase activity [GO:0004322]	cytoplasm [GO:0005737]		96.9564	37.0037	52.7623	1506.78	800.216	463.755	220.445	201.957	173.68	310.286	161.753	NaN	H. pylori
I0ZJ97	hcpC_3	A0A2X5AUD6_HELPX;I0ZJ97_HELPX	I0ZJ97	Beta-lactamase (EC 3.5.2.6)	HP17_00405	FUNCTION: Hydrolyzes 6-aminopenicillinic acid and 7-aminocephalosporanic acid (ACA) derivatives. {ECO:0000256|RuleBase:RU366075}.	Antibiotic resistance;Disulfide bond;Hydrolase;Repeat;Secreted;TPR repeat	response to antibiotic [GO:0046677]	beta-lactamase activity [GO:0008800]	extracellular region [GO:0005576]		NaN	NaN	NaN	NaN	NaN	NaN	NaN	NaN	NaN	NaN	NaN	840.338	H. pylori
A0A2X5AWP0	NCTC11637_01471	A0A2X5AWP0_HELPX	A0A2X5AWP0	Heme iron utilization protein	NCTC11637_01471							8.71336	3.16223	1.90759	8.36331	5.28661	NaN	2.23436	22.8185	2.53762	NaN	31.5009	NaN	H. pylori
I0ZBR3	clpB	A0A2X5AXH2_HELPX;I0ZBR3_HELPX	I0ZBR3	ATP-dependent protease binding subunit/heat shock protein	HP17_05015		ATP-binding;Chaperone;Coiled coil;Hydrolase;Nucleotide-binding;Protease;Repeat;Stress response	proteolysis [GO:0006508]	ATP binding [GO:0005524]; ATP hydrolysis activity [GO:0016887]; peptidase activity [GO:0008233]			NaN	149.821	94.9398	229.035	175.541	163.291	101.978	105.36	110.652	170.479	208.482	NaN	H. pylori
I0ZCZ4	trxA_1	A0A2X5CEP9_HELPX;I0ZCZ4_HELPX	I0ZCZ4	Thioredoxin	HP17_03729							NaN	NaN	88.9915	186.308	210.953	160.818	140.854	NaN	NaN	NaN	NaN	NaN	H. pylori
A0A2X5CEV7	hsdR9	A0A2X5CEV7_HELPX	A0A2X5CEV7	Type I restriction enzyme endonuclease subunit (R protein) (EC 3.1.21.3)	hsdR9 NCTC11637_00129	FUNCTION: Subunit R is required for both nuclease and ATPase activities, but not for modification. {ECO:0000256|RuleBase:RU364115}.	ATP-binding;DNA-binding;Endonuclease;Hydrolase;Nuclease;Nucleotide-binding;Restriction system	DNA restriction-modification system [GO:0009307]	ATP binding [GO:0005524]; DNA binding [GO:0003677]; type I site-specific deoxyribonuclease activity [GO:0009035]			2568.41	NaN	NaN	NaN	NaN	NaN	NaN	NaN	NaN	NaN	NaN	NaN	H. pylori
A0A2X5CH91	luxS	A0A2X5CH91_HELPX	A0A2X5CH91	S-ribosylhomocysteine lyase (EC 4.4.1.21) (AI-2 synthesis protein) (Autoinducer-2 production protein LuxS)	luxS NCTC11637_00313	FUNCTION: Involved in the synthesis of autoinducer 2 (AI-2) which is secreted by bacteria and is used to communicate both the cell density and the metabolic potential of the environment. The regulation of gene expression in response to changes in cell density is called quorum sensing. Catalyzes the transformation of S-ribosylhomocysteine (RHC) to homocysteine (HC) and 4,5-dihydroxy-2,3-pentadione…	Autoinducer synthesis;Hydrolase;Iron;Lyase;Metal-binding;Quorum sensing	quorum sensing [GO:0009372]	hydrolase activity [GO:0016787]; iron ion binding [GO:0005506]; S-ribosylhomocysteine lyase activity [GO:0043768]			NaN	NaN	NaN	197.052	94.8164	36.8547	NaN	58.1246	NaN	NaN	NaN	NaN	H. pylori
A0A2X5CL85	hopQ	A0A2X5CL85_HELPX	A0A2X5CL85	Outer membrane protein HopQ	hopQ NCTC11637_00639		Signal					183.514	180.274	140.11	196.595	120.317	157.021	152.744	155.584	208.012	196.774	232.533	202.013	H. pylori
I0ZBG6	hyaB	A0A2X5CN00_HELPX;I0ZBG6_HELPX	I0ZBG6	Nickel-dependent hydrogenase, large subunit	HP17_05415		Iron;Magnesium;Metal-binding;Nickel;Oxidoreductase		ferredoxin hydrogenase activity [GO:0008901]; nickel cation binding [GO:0016151]			850.936	727.298	377.259	780.76	645.202	711.534	688.723	731.482	1061.95	1242.87	1303.64	1073.09	H. pylori
I0ZE80	NCTC11637_01139	A0A2X5CRH1_HELPX;I0ZE80_HELPX	I0ZE80	Outer membrane protein HopB	HP17_02524		Signal					403.296	433.19	377.785	295.203	358.512	237.367	327.058	255.361	276.676	317.106	329.529	328.878	H. pylori
A0A2X5CZC5	serA	A0A2X5CZC5_HELPX	A0A2X5CZC5	D-3-phosphoglycerate dehydrogenase (EC 1.1.1.95)	serA NCTC11637_01255	FUNCTION: Catalyzes the reversible oxidation of 3-phospho-D-glycerate to 3-phosphonooxypyruvate, the first step of the phosphorylated L-serine biosynthesis pathway. Also catalyzes the reversible oxidation of 2-hydroxyglutarate to 2-oxoglutarate. {ECO:0000256|ARBA:ARBA00003800}.	Amino-acid biosynthesis;NAD;Oxidoreductase;Serine biosynthesis	L-serine biosynthetic process [GO:0006564]	NAD binding [GO:0051287]; phosphoglycerate dehydrogenase activity [GO:0004617]		PATHWAY: Amino-acid biosynthesis; L-serine biosynthesis; L-serine from 3-phospho-D-glycerate: step 1/3. {ECO:0000256|ARBA:ARBA00005216, ECO:0000256|RuleBase:RU363003}.	NaN	20.7809	46.5053	87.82	38.5124	24.8933	32.6873	21.7558	NaN	NaN	NaN	NaN	H. pylori
I0ZCN4	NCTC11637_00028	A0A2X5D1S9_HELPX;F8ULD8_HELPX;I0ZCN4_HELPX	I0ZCN4	Outer membrane protein (Omp32)	HP17_03979							308.66	344.327	231.59	217.88	273.242	193.688	210.43	252.655	235.247	336.413	418.384	417.05	H. pylori
A0A2X5D2L3	rpsB	A0A2X5D2L3_HELPX	A0A2X5D2L3	30S ribosomal protein S2	rpsB NCTC11637_00163		Ribonucleoprotein;Ribosomal protein	translation [GO:0006412]	structural constituent of ribosome [GO:0003735]	small ribosomal subunit [GO:0015935]		305.766	289.934	241.805	266.132	235.531	288.195	209.27	247.933	320.135	355.698	388.09	390.261	H. pylori
A0A2X5D3G5	icdA	A0A2X5D3G5_HELPX	A0A2X5D3G5	Isocitrate dehydrogenase [NADP] (EC 1.1.1.42)	icdA NCTC11637_00227		Glyoxylate bypass;Magnesium;Manganese;Metal-binding;NADP;Oxidoreductase;Tricarboxylic acid cycle	glyoxylate cycle [GO:0006097]; tricarboxylic acid cycle [GO:0006099]	isocitrate dehydrogenase (NADP+) activity [GO:0004450]; magnesium ion binding [GO:0000287]; NAD binding [GO:0051287]			546.894	549.492	494.356	615.491	553.987	583.782	534.322	510.824	612.909	592.362	812.867	694.493	H. pylori
A0A2X5D502	ureB	A0A2X5D502_HELPX	A0A2X5D502	Urease subunit beta (EC 3.5.1.5) (Urea amidohydrolase subunit beta)	ureB NCTC11637_00277		Cytoplasm;Hydrolase;Metal-binding;Nickel	urea catabolic process [GO:0043419]	nickel cation binding [GO:0016151]; urease activity [GO:0009039]	cytoplasm [GO:0005737]	PATHWAY: Nitrogen metabolism; urea degradation; CO(2) and NH(3) from urea (urease route): step 1/1. {ECO:0000256|ARBA:ARBA00004897, ECO:0000256|HAMAP-Rule:MF_01953}.	274.036	385.334	309.894	1287.34	885.166	707.313	420.717	406.996	430.219	353.353	313.173	448.911	H. pylori
I0ZFT3	dnaK	A0A2X5D599_HELPX;I0ZFT3_HELPX	I0ZFT3	Chaperone protein DnaK (HSP70) (Heat shock 70 kDa protein) (Heat shock protein 70)	dnaK HP17_00905	FUNCTION: Acts as a chaperone. {ECO:0000256|HAMAP-Rule:MF_00332}.	ATP-binding;Chaperone;Coiled coil;Nucleotide-binding;Phosphoprotein;Stress response		ATP binding [GO:0005524]; ATP-dependent protein folding chaperone [GO:0140662]; unfolded protein binding [GO:0051082]			4023.71	3675.9	2400.91	3026.26	2982.59	2761.98	2545.08	2381.19	2709.35	2522.44	2477.56	2744.19	H. pylori
A0A2X5D5F6	NCTC11637_00335	A0A2X5D5F6_HELPX	A0A2X5D5F6	Uncharacterized protein	NCTC11637_00335							114.981	138.909	89.1628	124.058	88.5403	92.7906	68.0062	100.56	143.895	108.08	91.8779	88.9459	H. pylori
I0ZIA2	NCTC11637_00394	A0A2X5D6C1_HELPX;I0ZIA2_HELPX	I0ZIA2	SPOR domain-containing protein	HP17_06612		Membrane;Transmembrane;Transmembrane helix			membrane [GO:0016020]		NaN	23.4329	33.3158	52.2418	44.343	43.2233	46.3056	34.319	54.9351	31.0486	48.1653	NaN	H. pylori
A0A2X5D6C7	ileS	A0A2X5D6C7_HELPX	A0A2X5D6C7	Isoleucine--tRNA ligase (EC 6.1.1.5) (Isoleucyl-tRNA synthetase) (IleRS)	ileS NCTC11637_01624	FUNCTION: Catalyzes the attachment of isoleucine to tRNA(Ile). As IleRS can inadvertently accommodate and process structurally similar amino acids such as valine, to avoid such errors it has two additional distinct tRNA(Ile)-dependent editing activities. One activity is designated as 'pretransfer' editing and involves the hydrolysis of activated Val-AMP. The other activity is designated 'posttran…	Aminoacyl-tRNA synthetase;ATP-binding;Cytoplasm;Ligase;Metal-binding;Nucleotide-binding;Protein biosynthesis;Zinc	isoleucyl-tRNA aminoacylation [GO:0006428]	aminoacyl-tRNA editing activity [GO:0002161]; ATP binding [GO:0005524]; isoleucine-tRNA ligase activity [GO:0004822]; tRNA binding [GO:0000049]; zinc ion binding [GO:0008270]	cytoplasm [GO:0005737]		207.77	127.777	161.172	210.149	166.071	192.755	144.892	158.696	139.115	244.077	274.037	162.593	H. pylori
A0A2X5D6G5	cls	A0A2X5D6G5_HELPX	A0A2X5D6G5	Phospholipase D (EC 2.7.8.-)	cls NCTC11637_00426		Transferase	organophosphate metabolic process [GO:0019637]	transferase activity [GO:0016740]			975.102	1022.91	957.683	1213.8	937.996	1145.79	754.495	752.397	607.242	645.164	547.462	892.675	H. pylori
A0A2X5D7P7	dnaJ	A0A2X5D7P7_HELPX	A0A2X5D7P7	Chaperone protein DnaJ	dnaJ NCTC11637_00473	FUNCTION: Participates actively in the response to hyperosmotic and heat shock by preventing the aggregation of stress-denatured proteins and by disaggregating proteins, also in an autonomous, DnaK-independent fashion. Unfolded proteins bind initially to DnaJ; upon interaction with the DnaJ-bound protein, DnaK hydrolyzes its bound ATP, resulting in the formation of a stable complex. GrpE releases…	Chaperone;Cytoplasm;DNA replication;Metal-binding;Repeat;Stress response;Zinc;Zinc-finger	DNA replication [GO:0006260]; protein folding [GO:0006457]; response to heat [GO:0009408]	ATP binding [GO:0005524]; heat shock protein binding [GO:0031072]; unfolded protein binding [GO:0051082]; zinc ion binding [GO:0008270]	cytoplasm [GO:0005737]		8.04335	13.6053	3.24351	17.2231	6.83174	16.6573	8.26469	10.6528	10.8697	7.8841	13.4308	5.82963	H. pylori
I0ZE27	rplJ	A0A2X5D989_HELPX;I0ZE27_HELPX	I0ZE27	50S ribosomal protein L10	rplJ HP17_02853	FUNCTION: Forms part of the ribosomal stalk, playing a central role in the interaction of the ribosome with GTP-bound translation factors. {ECO:0000256|ARBA:ARBA00002633, ECO:0000256|HAMAP-Rule:MF_00362}.	Ribonucleoprotein;Ribosomal protein;RNA-binding;rRNA-binding	translation [GO:0006412]	large ribosomal subunit rRNA binding [GO:0070180]; structural constituent of ribosome [GO:0003735]	large ribosomal subunit [GO:0015934]		NaN	92.545	275.573	140.183	161.11	129.757	116.342	96.3105	300.715	NaN	NaN	NaN	H. pylori
I0ZB72	fabF	A0A2X5DAZ8_HELPX;I0ZB72_HELPX	I0ZB72	3-oxoacyl-[acyl-carrier-protein] synthase 2 (EC 2.3.1.179)	HP17_05830	FUNCTION: Involved in the type II fatty acid elongation cycle. Catalyzes the elongation of a wide range of acyl-ACP by the addition of two carbons from malonyl-ACP to an acyl acceptor. Can efficiently catalyze the conversion of palmitoleoyl-ACP (cis-hexadec-9-enoyl-ACP) to cis-vaccenoyl-ACP (cis-octadec-11-enoyl-ACP), an essential step in the thermal regulation of fatty acid composition. {ECO:000…	Acyltransferase;Fatty acid biosynthesis;Fatty acid metabolism;Lipid biosynthesis;Lipid metabolism;Transferase	fatty acid biosynthetic process [GO:0006633]	3-oxoacyl-[acyl-carrier-protein] synthase activity [GO:0004315]		PATHWAY: Lipid metabolism; fatty acid biosynthesis. {ECO:0000256|ARBA:ARBA00005194, ECO:0000256|PIRNR:PIRNR000447}.	112.064	78.3329	122.717	80.3121	77.5808	95.8923	46.291	92.938	92.0353	200.604	55.7212	231.144	H. pylori
I0ZB39	oorC	A0A2X5DB42_HELPX;I0ZB39_HELPX	I0ZB39	2-oxoglutarate-acceptor oxidoreductase subunit OorC	oorC HP17_05655		Oxidoreductase		oxidoreductase activity, acting on the aldehyde or oxo group of donors [GO:0016903]			NaN	NaN	NaN	51.7462	24.8709	31.8315	NaN	NaN	NaN	NaN	NaN	NaN	H. pylori
I0ZDA1	NCTC11637_01110	A0A2X5DEH1_HELPX;I0ZDA1_HELPX	I0ZDA1	HotDog ACOT-type domain-containing protein	HP17_03424		Hydrolase		thiolester hydrolase activity [GO:0016790]			NaN	NaN	38.2392	524.562	267.862	161.858	50.5976	61.8869	74.552	NaN	56.7259	67.4484	H. pylori
I0ZHH2	guaA	A0A2X5DMP2_HELPX;I0ZHH2_HELPX	I0ZHH2	GMP synthase [glutamine-hydrolyzing] (EC 6.3.5.2) (GMP synthetase) (Glutamine amidotransferase)	guaA HP17_07274	FUNCTION: Catalyzes the synthesis of GMP from XMP. {ECO:0000256|ARBA:ARBA00002332, ECO:0000256|HAMAP-Rule:MF_00344}.	ATP-binding;Glutamine amidotransferase;GMP biosynthesis;Ligase;Nucleotide-binding;Purine biosynthesis	glutamine metabolic process [GO:0006541]	ATP binding [GO:0005524]; GMP synthase activity [GO:0003921]		PATHWAY: Purine metabolism; GMP biosynthesis; GMP from XMP (L-Gln route): step 1/1. {ECO:0000256|ARBA:ARBA00005153, ECO:0000256|HAMAP-Rule:MF_00344}.	NaN	NaN	NaN	NaN	14.5485	NaN	NaN	NaN	35.9868	NaN	NaN	NaN	H. pylori
I0ZCE7	porB	A0A2X5DPK7_HELPX;I0ZCE7_HELPX	I0ZCE7	Pyruvate ferredoxin oxidoreductase, beta subunit	HP17_00335		Pyruvate		catalytic activity [GO:0003824]; thiamine pyrophosphate binding [GO:0030976]			100.276	132.822	122.348	117.348	88.9558	132.441	91.642	90.815	123.283	101.415	161.255	137.141	H. pylori
A0A2X5DPP0	pepF	A0A2X5DPP0_HELPX	A0A2X5DPP0	Oligoendopeptidase F (EC 3.4.24.-)	pepF NCTC11637_01341		Hydrolase;Metal-binding;Metalloprotease;Protease;Zinc	proteolysis [GO:0006508]	metal ion binding [GO:0046872]; metalloendopeptidase activity [GO:0004222]			580.576	640.99	644.579	831.704	696.796	821.742	584.419	659.25	623.302	608.542	676.944	731.77	H. pylori
I0ZBU7	hflC	A0A2X5DSZ5_HELPX;I0ZBU7_HELPX	I0ZBU7	SpfH domain-containing protein	HP17_04928		Membrane;Transmembrane;Transmembrane helix			membrane [GO:0016020]		NaN	188.763	275.092	142.74	155.535	147.957	59.5403	176.958	223.486	NaN	NaN	478.412	H. pylori
A0A2X5DT37	NCTC11637_01565	A0A2X5DT37_HELPX	A0A2X5DT37	Outer membrane protein HopA putative signal peptide	NCTC11637_01565		Coiled coil					435.696	220.972	143.094	141.208	150.578	166.633	145.968	138.659	174.727	392.158	388.593	249.372	H. pylori
I0ZB40	oorB	I0ZB40_HELPX	I0ZB40	2-oxoglutarate-acceptor oxidoreductase subunit OorB (EC 1.2.7.3)	oorB HP17_05660 NCTC11637_00812		Oxidoreductase		2-oxoglutarate synthase activity [GO:0047553]; thiamine pyrophosphate binding [GO:0030976]			268.786	175.72	220.884	243.018	234.452	261.437	250.328	261.824	472.044	346.223	327.416	274.862	H. pylori
I0ZB60	pepA	I0ZB60_HELPX	I0ZB60	Probable cytosol aminopeptidase (EC 3.4.11.1) (Leucine aminopeptidase) (LAP) (EC 3.4.11.10) (Leucyl aminopeptidase)	pepA HP17_05770	FUNCTION: Presumably involved in the processing and regular turnover of intracellular proteins. Catalyzes the removal of unsubstituted N-terminal amino acids from various peptides. {ECO:0000256|HAMAP-Rule:MF_00181}.	Aminopeptidase;Cytoplasm;Hydrolase;Manganese;Metal-binding;Protease	proteolysis [GO:0006508]	manganese ion binding [GO:0030145]; metalloaminopeptidase activity [GO:0070006]	cytoplasm [GO:0005737]		127.402	NaN	52.476	24.324	NaN	63.0001	35.8486	59.2852	75.7977	65.2159	NaN	NaN	H. pylori
I0ZBX8	HP17_04891	I0ZBX8_HELPX	I0ZBX8	Domain of uncharacterized function (DUF2018)	HP17_04891 NCTC11637_01552							NaN	NaN	NaN	31.6695	14.4114	19.4053	NaN	NaN	NaN	NaN	NaN	NaN	H. pylori
I0ZC43	HP17_04581	I0ZC43_HELPX	I0ZC43	Ubiquinol-cytochrome C chaperone family protein	HP17_04581 NCTC11637_00197							282.929	182.877	170.645	255.824	202.446	221.548	149.887	211.375	200.214	205.066	237.54	199.26	H. pylori
I0ZCE9	porD	I0ZCE9_HELPX	I0ZCE9	Pyruvate flavodoxin oxidoreductase subunit delta (EC 1.2.7.1)	porD HP17_00345 NCTC11637_01315		Iron;Iron-sulfur;Metal-binding;Oxidoreductase;Pyruvate		4 iron, 4 sulfur cluster binding [GO:0051539]; metal ion binding [GO:0046872]; pyruvate synthase activity [GO:0019164]			174.451	NaN	151.033	255.468	198.76	177.622	NaN	NaN	NaN	228.32	NaN	NaN	H. pylori
I0ZCZ2	HP17_03719	I0ZCZ2_HELPX	I0ZCZ2	LPP20 lipoprotein	HP17_03719 NCTC11637_00076	FUNCTION: Could play a role in the pathogenesis of H.pylori by serving as an inflammatory mediator. {ECO:0000256|PIRNR:PIRNR011368}.	Cell outer membrane;Lipoprotein;Membrane			cell outer membrane [GO:0009279]		105.656	118.404	107.781	96.3558	102.116	121.358	85.7617	92.4249	82.7851	83.4128	88.3016	107.61	H. pylori
I0ZD72	atpB2	I0ZD72_HELPX	I0ZD72	ATP synthase subunit beta (EC 7.1.2.2) (ATP synthase F1 sector subunit beta) (F-ATPase subunit beta)	atpB2 atpD HP17_03534 NCTC11637_00686	FUNCTION: Produces ATP from ADP in the presence of a proton gradient across the membrane. The catalytic sites are hosted primarily by the beta subunits. {ECO:0000256|HAMAP-Rule:MF_01347}.	ATP synthesis;ATP-binding;Cell membrane;CF(1);Hydrogen ion transport;Hydrolase;Ion transport;Membrane;Nucleotide-binding;Translocase;Transport		ATP binding [GO:0005524]; hydrolase activity [GO:0016787]; proton-transporting ATP synthase activity, rotational mechanism [GO:0046933]; proton-transporting ATPase activity, rotational mechanism [GO:0046961]	plasma membrane [GO:0005886]; proton-transporting ATP synthase complex, catalytic core F(1) [GO:0045261]		456.495	471.628	437.074	502.509	439.963	411.297	290.616	370.091	423.88	485.039	463.299	323.738	H. pylori
I0ZDE8	greA	I0ZDE8_HELPX	I0ZDE8	Transcription elongation factor GreA (Transcript cleavage factor GreA)	greA HP17_03279 NCTC11637_01088	FUNCTION: Necessary for efficient RNA polymerase transcription elongation past template-encoded arresting sites. The arresting sites in DNA have the property of trapping a certain fraction of elongating RNA polymerases that pass through, resulting in locked ternary complexes. Cleavage of the nascent transcript by cleavage factors such as GreA or GreB allows the resumption of elongation from the n…	DNA-binding;Elongation factor;Protein biosynthesis;Transcription;Transcription regulation	regulation of DNA-templated transcription elongation [GO:0032784]	DNA binding [GO:0003677]; RNA polymerase binding [GO:0070063]; translation elongation factor activity [GO:0003746]			NaN	194.472	NaN	NaN	NaN	213.972	NaN	NaN	NaN	NaN	NaN	NaN	H. pylori
I0ZDX3	rpsL	I0ZDX3_HELPX	I0ZDX3	30S ribosomal protein S12	rpsL HP17_02887 NCTC11637_00619	FUNCTION: Interacts with and stabilizes bases of the 16S rRNA that are involved in tRNA selection in the A site and with the mRNA backbone. Located at the interface of the 30S and 50S subunits, it traverses the body of the 30S subunit contacting proteins on the other side and probably holding the rRNA structure together. The combined cluster of proteins S8, S12 and S17 appears to hold together th…	Ribonucleoprotein;Ribosomal protein;RNA-binding;rRNA-binding;tRNA-binding	translation [GO:0006412]	rRNA binding [GO:0019843]; structural constituent of ribosome [GO:0003735]; tRNA binding [GO:0000049]	small ribosomal subunit [GO:0015935]		198.519	229.028	228.624	212.953	189.192	190.764	159.653	166.548	171.933	211.37	262.793	302.573	H. pylori
I0ZE07	HP17_02753	I0ZE07_HELPX	I0ZE07	D-lactate dehydrogenase	HP17_02753		Iron;Iron-sulfur;Metal-binding		catalytic activity [GO:0003824]; FAD binding [GO:0071949]; iron-sulfur cluster binding [GO:0051536]; metal ion binding [GO:0046872]			54.1074	NaN	NaN	NaN	13.9609	NaN	13.0915	10.7477	50.9153	23.0813	121.959	97.0095	H. pylori
I0ZE28	rplL	I0ZE28_HELPX	I0ZE28	50S ribosomal protein L7/L12	rplL HP17_02858 NCTC11637_00617	FUNCTION: Forms part of the ribosomal stalk which helps the ribosome interact with GTP-bound translation factors. Is thus essential for accurate translation. {ECO:0000256|HAMAP-Rule:MF_00368}.	Ribonucleoprotein;Ribosomal protein	translation [GO:0006412]	structural constituent of ribosome [GO:0003735]	ribonucleoprotein complex [GO:1990904]; ribosome [GO:0005840]		76.38	43.6859	NaN	129.319	82.4044	32.6162	30.6037	47.1529	52.255	56.7675	NaN	NaN	H. pylori
I0ZE35	HP17_02638	I0ZE35_HELPX	I0ZE35	Uncharacterized protein conserved in bacteria	HP17_02638 NCTC11637_00566							NaN	NaN	NaN	35.7832	100.158	NaN	NaN	NaN	NaN	NaN	NaN	NaN	H. pylori
V5REB7	HP17_01873	I0ZEZ0_HELPX;V5REB7_HELPX	V5REB7	Septum site-determining protein MinD (Cell division inhibitor MinD)	minD NCTC11637_01456	FUNCTION: ATPase required for the correct placement of the division site. Cell division inhibitors MinC and MinD act in concert to form an inhibitor capable of blocking formation of the polar Z ring septums. Rapidly oscillates between the poles of the cell to destabilize FtsZ filaments that have formed before they mature into polar Z rings. {ECO:0000256|ARBA:ARBA00025436}.	ATP-binding;Cell cycle;Cell division;Cell membrane;Membrane;Nucleotide-binding	cell division [GO:0051301]	ATP binding [GO:0005524]; ATP hydrolysis activity [GO:0016887]	plasma membrane [GO:0005886]		95.9336	88.4711	36.5068	80.5396	70.3013	95.9787	85.418	83.9724	120.01	73.4745	81.9606	94.8314	H. pylori
I0ZFF0	rpsH	I0ZFF0_HELPX	I0ZFF0	30S ribosomal protein S8	rpsH HP17_01583 NCTC11637_00500	FUNCTION: One of the primary rRNA binding proteins, it binds directly to 16S rRNA central domain where it helps coordinate assembly of the platform of the 30S subunit. {ECO:0000256|HAMAP-Rule:MF_01302}.	Ribonucleoprotein;Ribosomal protein;RNA-binding;rRNA-binding	translation [GO:0006412]	rRNA binding [GO:0019843]; structural constituent of ribosome [GO:0003735]	ribonucleoprotein complex [GO:1990904]; ribosome [GO:0005840]		263.556	290.353	341.371	480.115	360.36	365.084	279.152	353.698	242.585	280.617	316.278	273.207	H. pylori
I0ZFF5	rpsQ	I0ZFF5_HELPX	I0ZFF5	30S ribosomal protein S17	rpsQ HP17_01608 NCTC11637_00496	FUNCTION: One of the primary rRNA binding proteins, it binds specifically to the 5'-end of 16S ribosomal RNA. {ECO:0000256|HAMAP-Rule:MF_01345}.	Ribonucleoprotein;Ribosomal protein;RNA-binding;rRNA-binding	translation [GO:0006412]	rRNA binding [GO:0019843]; structural constituent of ribosome [GO:0003735]	ribonucleoprotein complex [GO:1990904]; ribosome [GO:0005840]		45.3549	47.194	69.1897	121.558	80.2937	91.732	NaN	76.419	NaN	NaN	56.2801	NaN	H. pylori
I0ZFJ6	HP17_01088	I0ZFJ6_HELPX	I0ZFJ6	Dynamin N-terminal domain-containing protein	HP17_01088		Coiled coil;GTP-binding;Hydrolase;Membrane;Nucleotide-binding		GTP binding [GO:0005525]; GTPase activity [GO:0003924]	membrane [GO:0016020]		175.38	87.5915	135.54	141.756	176.032	118.528	88.7646	106.403	102.394	132.586	110.491	126.699	H. pylori
I0ZGF5	HP17_08374	I0ZGF5_HELPX	I0ZGF5	Restriction enzyme	HP17_08374				ATP binding [GO:0005524]; ATP hydrolysis activity [GO:0016887]			1173.13	NaN	NaN	NaN	NaN	NaN	NaN	NaN	NaN	NaN	NaN	NaN	H. pylori
I0ZGJ4	HP17_08229	I0ZGJ4_HELPX	I0ZGJ4	DedA family protein	HP17_08229		Membrane;Transmembrane;Transmembrane helix			membrane [GO:0016020]		300.825	262.61	262.726	260.069	305.871	298.2	256.359	291.472	290.845	365.403	NaN	304.667	H. pylori
I0ZHC4	gyrB	I0ZHC4_HELPX	I0ZHC4	DNA gyrase subunit B (EC 5.6.2.2)	gyrB HP17_07507	FUNCTION: A type II topoisomerase that negatively supercoils closed circular double-stranded (ds) DNA in an ATP-dependent manner to modulate DNA topology and maintain chromosomes in an underwound state. Negative supercoiling favors strand separation, and DNA replication, transcription, recombination and repair, all of which involve strand separation. Also able to catalyze the interconversion of o…	ATP-binding;Cytoplasm;DNA-binding;Isomerase;Magnesium;Metal-binding;Nucleotide-binding;Topoisomerase	DNA topological change [GO:0006265]; DNA-templated DNA replication [GO:0006261]	ATP binding [GO:0005524]; DNA binding [GO:0003677]; DNA topoisomerase type II (double strand cut, ATP-hydrolyzing) activity [GO:0003918]; metal ion binding [GO:0046872]	chromosome [GO:0005694]; cytoplasm [GO:0005737]		93.6382	155.76	77.2547	82.5031	78.4135	111.741	169.586	81.004	118.019	NaN	185.721	180.078	H. pylori
I0ZIG4	HP17_00506	I0ZIG4_HELPX	I0ZIG4	Ribosomal RNA small subunit methyltransferase E (EC 2.1.1.193)	HP17_00506	FUNCTION: Specifically methylates the N3 position of the uracil ring of uridine 1498 (m3U1498) in 16S rRNA. Acts on the fully assembled 30S ribosomal subunit. {ECO:0000256|ARBA:ARBA00025699, ECO:0000256|PIRNR:PIRNR015601}.	Cytoplasm;Methyltransferase;rRNA processing;S-adenosyl-L-methionine;Transferase	methylation [GO:0032259]; rRNA processing [GO:0006364]	methyltransferase activity [GO:0008168]	cytoplasm [GO:0005737]		NaN	409.241	257.271	NaN	432.951	317.551	487.934	NaN	NaN	NaN	NaN	611.394	H. pylori
P14206	Rpsa	RSSA_MOUSE	P14206	Small ribosomal subunit protein uS2 (37 kDa laminin receptor precursor) (37LRP) (37 kDa oncofetal antigen) (37/67 kDa laminin receptor) (LRP/LR) (40S ribosomal protein SA) (67 kDa laminin receptor) (67LR) (Laminin receptor 1) (LamR) (Laminin-binding protein precursor p40) (LBP/p40) (OFA/iLRP)	Rpsa Lamr1 P40-8	FUNCTION: Required for the assembly and/or stability of the 40S ribosomal subunit. Required for the processing of the 20S rRNA-precursor to mature 18S rRNA in a late step of the maturation of 40S ribosomal subunits. Also functions as a cell surface receptor for laminin. Plays a role in cell adhesion to the basement membrane and in the consequent activation of signaling transduction pathways. May …	3D-structure;Acetylation;Cell membrane;Cytoplasm;Direct protein sequencing;Isopeptide bond;Membrane;Nucleus;Phosphoprotein;Receptor;Reference proteome;Repeat;Ribonucleoprotein;Ribosomal protein;Ubl conjugation	cell-cell adhesion [GO:0098609]; cytoplasmic translation [GO:0002181]; ribosomal small subunit assembly [GO:0000028]	laminin binding [GO:0043236]; laminin receptor activity [GO:0005055]; ribosome binding [GO:0043022]; structural constituent of ribosome [GO:0003735]	basement membrane [GO:0005604]; collagen-containing extracellular matrix [GO:0062023]; cytoplasm [GO:0005737]; cytosol [GO:0005829]; cytosolic ribosome [GO:0022626]; cytosolic small ribosomal subunit [GO:0022627]; glutamatergic synapse [GO:0098978]; membrane [GO:0016020]; neuronal cell body [GO:0043025]; nucleus [GO:0005634]; plasma membrane [GO:0005886]; postsynapse [GO:0098794]; ribosome [GO:00…		8714.29	9089.12	10153.1	8138.49	9988.86	8324.53	9356.32	9404.04	9484.75	8814.05	8989.33	9101.08	H. pylori
P55264	Adk	ADK_MOUSE	P55264	Adenosine kinase (AK) (EC 2.7.1.20) (Adenosine 5'-phosphotransferase)	Adk	FUNCTION: Catalyzes the phosphorylation of the purine nucleoside adenosine at the 5' position in an ATP-dependent manner. Serves as a potential regulator of concentrations of extracellular adenosine and intracellular adenine nucleotides. {ECO:0000269|PubMed:15317590}.	3D-structure;Alternative splicing;ATP-binding;Cytoplasm;Kinase;Magnesium;Metal-binding;Nucleotide-binding;Nucleus;Phosphoprotein;Purine salvage;Reference proteome;Transferase	adenosine metabolic process [GO:0046085]; AMP salvage [GO:0044209]; dAMP salvage [GO:0106383]; dATP biosynthetic process [GO:0006175]; GMP salvage [GO:0032263]; phosphorylation [GO:0016310]; positive regulation of cardiac muscle hypertrophy [GO:0010613]; positive regulation of T cell proliferation [GO:0042102]; purine nucleobase metabolic process [GO:0006144]; purine ribonucleoside salvage [GO:00…	adenosine kinase activity [GO:0004001]; ATP binding [GO:0005524]; deoxyadenosine kinase activity [GO:0004136]; metal ion binding [GO:0046872]	cytoplasm [GO:0005737]; cytosol [GO:0005829]; nucleoplasm [GO:0005654]; nucleus [GO:0005634]; plasma membrane [GO:0005886]	PATHWAY: Purine metabolism; AMP biosynthesis via salvage pathway; AMP from adenosine: step 1/1.	618.467	437.924	443.226	451.991	573.583	411.258	484.875	444.923	508.056	598.755	600.375	559.1	H. pylori
Q8CCN6	Clpb	CLPB_MOUSE;Q8CCN6_MOUSE	Q8CCN6	ClpB caseinolytic peptidase B	Clpb Skd3		ANK repeat;Proteomics identification;Reference proteome;Repeat		ATP binding [GO:0005524]; ATP hydrolysis activity [GO:0016887]			938.302	873.084	967.497	779.874	846.221	752.222	813.557	716.8	838.734	927.455	956.924	915.724	H. pylori
Q8R059	Gale	GALE_MOUSE	Q8R059	UDP-glucose 4-epimerase (EC 5.1.3.2) (Galactowaldenase) (UDP-N-acetylglucosamine 4-epimerase) (UDP-GlcNAc 4-epimerase) (EC 5.1.3.7) (UDP-galactosamine 4-epimerase) (UDP-GalNAc 4-epimerase) (UDP-galactose 4-epimerase)	Gale	FUNCTION: Catalyzes two distinct but analogous reactions: the reversible epimerization of UDP-glucose to UDP-galactose and the reversible epimerization of UDP-N-acetylglucosamine to UDP-N-acetylgalactosamine. The reaction with UDP-Gal plays a critical role in the Leloir pathway of galactose catabolism in which galactose is converted to the glycolytic intermediate glucose 6-phosphate. It contribut…	Carbohydrate metabolism;Galactose metabolism;Isomerase;NAD;Reference proteome	galactose catabolic process [GO:0019388]; galactose catabolic process via UDP-galactose [GO:0033499]; galactose metabolic process [GO:0006012]; glycolytic process from galactose [GO:0061623]	identical protein binding [GO:0042802]; protein homodimerization activity [GO:0042803]; UDP-glucose 4-epimerase activity [GO:0003978]; UDP-N-acetylglucosamine 4-epimerase activity [GO:0003974]	cytosol [GO:0005829]	PATHWAY: Carbohydrate metabolism; galactose metabolism.	363.629	383.741	371.362	413.286	407.239	343.873	421.427	415.901	480.987	493.121	500.476	416.288	H. pylori
P28063	Psmb8	G3UZW8_MOUSE;PSB8_MOUSE	P28063	Proteasome subunit beta type-8 (EC 3.4.25.1) (Low molecular mass protein 7) (Macropain subunit C13) (Multicatalytic endopeptidase complex subunit C13) (Proteasome component C13) (Proteasome subunit beta-5i)	Psmb8 Lmp7 Mc13	FUNCTION: The proteasome is a multicatalytic proteinase complex which is characterized by its ability to cleave peptides with Arg, Phe, Tyr, Leu, and Glu adjacent to the leaving group at neutral or slightly basic pH. The proteasome has an ATP-dependent proteolytic activity. This subunit is involved in antigen processing to generate class I binding peptides. May participate in the inflammatory res…	3D-structure;Cytoplasm;Differentiation;Hydrolase;Immunity;Nucleus;Protease;Proteasome;Reference proteome;Threonine protease;Zymogen	antigen processing and presentation [GO:0019882]; fat cell differentiation [GO:0045444]; proteolysis involved in protein catabolic process [GO:0051603]; regulation of endopeptidase activity [GO:0052548]	endopeptidase activity [GO:0004175]; threonine-type endopeptidase activity [GO:0004298]	cytosol [GO:0005829]; nucleoplasm [GO:0005654]; nucleus [GO:0005634]; proteasome complex [GO:0000502]; proteasome core complex [GO:0005839]; proteasome core complex, beta-subunit complex [GO:0019774]; spermatoproteasome complex [GO:1990111]		2866.42	2856.57	2575.81	2706.99	2561.89	2440.59	2298.46	2439.83	2447.6	2149.5	2428.32	2282.43	Antigen processing
O35424	H2-Ob	A0A494BB12_MOUSE;E9Q479_MOUSE;O35424_MOUSE	O35424	Histocompatibility 2, O region beta locus (IAbeta2 subunit)	H2-Ob H2-IAbeta2		Adaptive immunity;Glycoprotein;Immunity;Membrane;MHC II;Proteomics identification;Reference proteome;Signal;Transmembrane;Transmembrane helix	adaptive immune response [GO:0002250]; antigen processing and presentation of exogenous peptide antigen via MHC class II [GO:0019886]; negative regulation of antigen processing and presentation of peptide antigen via MHC class II [GO:0002587]; peptide antigen assembly with MHC class II protein complex [GO:0002503]; positive regulation of T cell activation [GO:0050870]	MHC class II protein complex binding [GO:0023026]	lysosome [GO:0005764]; MHC class II protein complex [GO:0042613]		125.509	62.1439	70.84	100.52	88.9984	80.8604	99.9169	113.445	89.6794	NaN	NaN	NaN	Antigen processing
Q3TQS0	Calr4	A2A8Z3_MOUSE;Q3TQS0_MOUSE	Q3TQS0	Calreticulin	Calr4		Chaperone;Disulfide bond;Endoplasmic reticulum;Proteomics identification;Reference proteome;Repeat;Signal	protein folding [GO:0006457]; ubiquitin-dependent ERAD pathway [GO:0030433]	calcium ion binding [GO:0005509]; unfolded protein binding [GO:0051082]	endoplasmic reticulum lumen [GO:0005788]; endoplasmic reticulum membrane [GO:0005789]		2514.81	NaN	1496.66	845.214	1068.26	1358.61	1373.29	1567.67	1096.08	2699.6	2898.47	2130.68	Antigen processing
E9Q0C3	Hsp90ab1	E9Q0C3_MOUSE	E9Q0C3	Heat shock protein 90 alpha (cytosolic), class B member 1	Hsp90ab1		ATP-binding;Chaperone;Nucleotide-binding;Proteomics identification;Reference proteome		ATP binding [GO:0005524]; ATP hydrolysis activity [GO:0016887]; ATP-dependent protein folding chaperone [GO:0140662]; unfolded protein binding [GO:0051082]			60.2106	69.1818	25.3259	19.1487	NaN	18.1824	NaN	31.0897	NaN	41.6042	NaN	NaN	Antigen processing
P97371	Psme1	G3UXZ5_MOUSE;PSME1_MOUSE	P97371	Proteasome activator complex subunit 1 (11S regulator complex subunit alpha) (REG-alpha) (Activator of multicatalytic protease subunit 1) (Proteasome activator 28 subunit alpha) (PA28a) (PA28alpha)	Psme1	FUNCTION: Implicated in immunoproteasome assembly and required for efficient antigen processing. The PA28 activator complex enhances the generation of class I binding peptides by altering the cleavage pattern of the proteasome.	3D-structure;Proteasome;Reference proteome	antigen processing and presentation of exogenous antigen [GO:0019884]; positive regulation of endopeptidase activity [GO:0010950]; regulation of G1/S transition of mitotic cell cycle [GO:2000045]; regulation of proteasomal protein catabolic process [GO:0061136]	endopeptidase activator activity [GO:0061133]	cytoplasm [GO:0005737]; nucleoplasm [GO:0005654]; proteasome activator complex [GO:0008537]		7333.91	6478.42	6557.44	5199.39	6278.08	4717.83	7404.04	6575.81	6708.49	6655.76	6593.87	6218.7	Antigen processing
G3X9V0	Psme2	G3X9V0_MOUSE	G3X9V0	Proteasome (prosome, macropain) activator subunit 2 (PA28 beta)	Psme2		Proteasome;Proteomics identification;Reference proteome			proteasome activator complex [GO:0008537]		14961.2	17227	16926.3	15295.9	16643.5	16543.5	16671.5	14822.1	14781.2	14426.8	15488.5	15711.5	Antigen processing
O54962	Banf1	BAF_MOUSE	O54962	Barrier-to-autointegration factor (LAP2-binding protein 1) [Cleaved into: Barrier-to-autointegration factor, N-terminally processed]	Banf1 Baf L2bp1	FUNCTION: Non-specific DNA-binding protein that plays key roles in mitotic nuclear reassembly, chromatin organization, DNA damage response, gene expression and intrinsic immunity against foreign DNA (By similarity). Contains two non-specific double-stranded DNA (dsDNA)-binding sites which promote DNA cross-bridging (By similarity). Plays a key role in nuclear membrane reformation at the end of mi…	Acetylation;Chromosome;Cytoplasm;DNA-binding;Nucleus;Phosphoprotein;Reference proteome	chromatin organization [GO:0006325]; DNA integration [GO:0015074]; establishment of integrated proviral latency [GO:0075713]; mitotic nuclear membrane reassembly [GO:0007084]; negative regulation of innate immune response [GO:0045824]; negative regulation of protein ADP-ribosylation [GO:0010836]; negative regulation of type I interferon production [GO:0032480]; negative regulation of viral genome…	DNA binding [GO:0003677]; double-stranded DNA binding [GO:0003690]; identical protein binding [GO:0042802]; molecular function inhibitor activity [GO:0140678]; protein homodimerization activity [GO:0042803]	chromatin [GO:0000785]; condensed chromosome [GO:0000793]; cytoplasm [GO:0005737]; cytosol [GO:0005829]; nuclear envelope [GO:0005635]; nucleoplasm [GO:0005654]; nucleus [GO:0005634]		6090.75	4381.77	4446.3	4479.57	5821.56	4665.46	4418.83	4334.79	5777.66	5207.7	6358.35	6688.34	Antigen processing
P01887	B2m	B2MG_MOUSE	P01887	Beta-2-microglobulin	B2m	FUNCTION: Component of the class I major histocompatibility complex (MHC). Involved in the presentation of peptide antigens to the immune system.	3D-structure;Direct protein sequencing;Disulfide bond;Immunity;Immunoglobulin domain;MHC I;Reference proteome;Secreted;Signal	amyloid fibril formation [GO:1990000]; antibacterial humoral response [GO:0019731]; antigen processing and presentation of endogenous peptide antigen via MHC class I [GO:0019885]; antigen processing and presentation of exogenous peptide antigen via MHC class II [GO:0019886]; antigen processing and presentation of exogenous protein antigen via MHC class Ib, TAP-dependent [GO:0002481]; antimicrobia…	identical protein binding [GO:0042802]; MHC class II protein complex binding [GO:0023026]; protein homodimerization activity [GO:0042803]	cytosol [GO:0005829]; external side of plasma membrane [GO:0009897]; extracellular space [GO:0005615]; Golgi apparatus [GO:0005794]; HFE-transferrin receptor complex [GO:1990712]; MHC class I peptide loading complex [GO:0042824]; MHC class I protein complex [GO:0042612]; MHC class II protein complex [GO:0042613]; phagocytic vesicle membrane [GO:0030670]; plasma membrane [GO:0005886]		2096.21	2394.66	2884.59	1975.48	1920.79	2211.6	2334.94	2430.21	2053.11	2202.3	1849.65	1992.12	Antigen processing
P01900	H2-D1	HA12_MOUSE	P01900	H-2 class I histocompatibility antigen, D-D alpha chain (H-2D(D))	H2-D1	FUNCTION: Involved in the presentation of foreign antigens to the immune system.	3D-structure;Direct protein sequencing;Disulfide bond;Glycoprotein;Immunity;Membrane;MHC I;Phosphoprotein;Reference proteome;Signal;Transmembrane;Transmembrane helix	antigen processing and presentation of endogenous peptide antigen via MHC class I via ER pathway, TAP-dependent [GO:0002485]; antigen processing and presentation of endogenous peptide antigen via MHC class I via ER pathway, TAP-independent [GO:0002486]; antigen processing and presentation of endogenous peptide antigen via MHC class Ib [GO:0002476]; immune response [GO:0006955]; negative regulatio…	14-3-3 protein binding [GO:0071889]; beta-2-microglobulin binding [GO:0030881]; CD8 receptor binding [GO:0042610]; identical protein binding [GO:0042802]; MHC class I protein binding [GO:0042288]; natural killer cell lectin-like receptor binding [GO:0046703]; peptide antigen binding [GO:0042605]; peptide binding [GO:0042277]; protein homodimerization activity [GO:0042803]; protein-containing comp…	cell surface [GO:0009986]; cis-Golgi network membrane [GO:0033106]; early endosome [GO:0005769]; early endosome membrane [GO:0031901]; endoplasmic reticulum [GO:0005783]; endoplasmic reticulum exit site [GO:0070971]; external side of plasma membrane [GO:0009897]; extracellular space [GO:0005615]; Golgi apparatus [GO:0005794]; Golgi medial cisterna [GO:0005797]; Golgi membrane [GO:0000139]; lumena…		1603.42	1679.34	1677.66	1540.11	1413.56	1507.54	1408.61	1373.42	1459.99	1363.41	1467.32	1482.2	Antigen processing
P01902	H2-K1	HA1D_MOUSE	P01902	H-2 class I histocompatibility antigen, K-D alpha chain (H-2K(D))	H2-K1 H2-K	FUNCTION: Involved in the presentation of foreign antigens to the immune system.	3D-structure;Direct protein sequencing;Disulfide bond;Glycoprotein;Immunity;Membrane;MHC I;Phosphoprotein;Reference proteome;Signal;Transmembrane;Transmembrane helix	antigen processing and presentation of endogenous peptide antigen via MHC class I via ER pathway, TAP-dependent [GO:0002485]; antigen processing and presentation of endogenous peptide antigen via MHC class I via ER pathway, TAP-independent [GO:0002486]; antigen processing and presentation of endogenous peptide antigen via MHC class Ib [GO:0002476]; antigen processing and presentation of exogenous…	14-3-3 protein binding [GO:0071889]; beta-2-microglobulin binding [GO:0030881]; CD8 receptor binding [GO:0042610]; identical protein binding [GO:0042802]; MHC class I protein binding [GO:0042288]; natural killer cell lectin-like receptor binding [GO:0046703]; peptide antigen binding [GO:0042605]; peptide binding [GO:0042277]; protein homodimerization activity [GO:0042803]; protein-containing comp…	cell surface [GO:0009986]; cis-Golgi network membrane [GO:0033106]; early endosome [GO:0005769]; early endosome membrane [GO:0031901]; endoplasmic reticulum [GO:0005783]; endoplasmic reticulum exit site [GO:0070971]; external side of plasma membrane [GO:0009897]; extracellular space [GO:0005615]; Golgi apparatus [GO:0005794]; Golgi medial cisterna [GO:0005797]; Golgi membrane [GO:0000139]; lumena…		927.332	955.89	860.862	748.389	761.869	699.327	761.009	798.452	844.527	953.116	957.439	878.08	Antigen processing
P04224	H2-Ea	HA21_MOUSE;HA22_MOUSE	P04224	H-2 class II histocompatibility antigen, E-K alpha chain			3D-structure;Adaptive immunity;Disulfide bond;Glycoprotein;Immunity;Membrane;MHC II;Reference proteome;Signal;Transmembrane;Transmembrane helix	adaptive immune response [GO:0002250]; antigen processing and presentation of exogenous peptide antigen via MHC class II [GO:0019886]; peptide antigen assembly with MHC class II protein complex [GO:0002503]; positive regulation of T cell activation [GO:0050870]	MHC class II protein complex binding [GO:0023026]	MHC class II protein complex [GO:0042613]		1476.65	1382.4	1411.41	1294.68	1237.18	1250.23	1178.16	1354.55	1277.08	1156.58	1191.54	1098.09	Antigen processing
P01921	H2-Ab1	HB2D_MOUSE	P01921	H-2 class II histocompatibility antigen, A-D beta chain	H2-Ab1		3D-structure;Adaptive immunity;Disulfide bond;Glycoprotein;Immunity;Membrane;MHC II;Reference proteome;Signal;Transmembrane;Transmembrane helix;Ubl conjugation	adaptive immune response [GO:0002250]; antigen processing and presentation [GO:0019882]; antigen processing and presentation of exogenous peptide antigen via MHC class II [GO:0019886]; antigen processing and presentation of peptide antigen [GO:0048002]; immune response [GO:0006955]; peptide antigen assembly with MHC class II protein complex [GO:0002503]; positive regulation of T cell activation […	MHC class II protein complex binding [GO:0023026]; peptide antigen binding [GO:0042605]; protein-containing complex binding [GO:0044877]	cell surface [GO:0009986]; early endosome [GO:0005769]; external side of plasma membrane [GO:0009897]; Golgi apparatus [GO:0005794]; membrane [GO:0016020]; MHC class II protein complex [GO:0042613]; multivesicular body [GO:0005771]; plasma membrane [GO:0005886]		5013.35	5809.01	5798.12	6115.12	5776.71	5949.39	5777.13	5849.43	5608.2	5191.11	4645.44	4898.28	Antigen processing
P04223	H2-K1	HA1K_MOUSE	P04223	H-2 class I histocompatibility antigen, K-K alpha chain (H-2K(K))	H2-K1 H2-K	FUNCTION: Involved in the presentation of foreign antigens to the immune system.	3D-structure;Alternative splicing;Disulfide bond;Glycoprotein;Immunity;Membrane;MHC I;Phosphoprotein;Reference proteome;Signal;Transmembrane;Transmembrane helix	antigen processing and presentation of endogenous peptide antigen via MHC class I via ER pathway, TAP-dependent [GO:0002485]; antigen processing and presentation of endogenous peptide antigen via MHC class I via ER pathway, TAP-independent [GO:0002486]; antigen processing and presentation of endogenous peptide antigen via MHC class Ib [GO:0002476]; antigen processing and presentation of exogenous…	14-3-3 protein binding [GO:0071889]; beta-2-microglobulin binding [GO:0030881]; CD8 receptor binding [GO:0042610]; identical protein binding [GO:0042802]; MHC class I protein binding [GO:0042288]; natural killer cell lectin-like receptor binding [GO:0046703]; peptide antigen binding [GO:0042605]; peptide binding [GO:0042277]; protein homodimerization activity [GO:0042803]; protein-containing comp…	cell surface [GO:0009986]; cis-Golgi network membrane [GO:0033106]; early endosome [GO:0005769]; early endosome membrane [GO:0031901]; endoplasmic reticulum [GO:0005783]; endoplasmic reticulum exit site [GO:0070971]; external side of plasma membrane [GO:0009897]; extracellular space [GO:0005615]; Golgi apparatus [GO:0005794]; Golgi medial cisterna [GO:0005797]; Golgi membrane [GO:0000139]; lumena…		1209.73	897.72	945.235	795.586	868.458	825.699	787.314	729.09	596.862	916.895	825.498	909.405	Antigen processing
P04227	H2-Aa	HA2Q_MOUSE	P04227	H-2 class II histocompatibility antigen, A-Q alpha chain	H2-Aa		Adaptive immunity;Disulfide bond;Glycoprotein;Immunity;Membrane;MHC II;Reference proteome;Transmembrane;Transmembrane helix	adaptive immune response [GO:0002250]; antigen processing and presentation [GO:0019882]; antigen processing and presentation of exogenous peptide antigen via MHC class II [GO:0019886]; antigen processing and presentation of peptide antigen [GO:0048002]; negative regulation of T cell proliferation [GO:0042130]; peptide antigen assembly with MHC class II protein complex [GO:0002503]; positive regul…	MHC class II protein complex binding [GO:0023026]; peptide antigen binding [GO:0042605]; protein-containing complex binding [GO:0044877]	external side of plasma membrane [GO:0009897]; lysosome [GO:0005764]; MHC class II protein complex [GO:0042613]; plasma membrane [GO:0005886]		NaN	15.5126	NaN	NaN	NaN	NaN	NaN	NaN	30.5002	41.1367	NaN	35.9229	Antigen processing
P04228	H2-Aa	HA2D_MOUSE	P04228	H-2 class II histocompatibility antigen, A-D alpha chain	H2-Aa		3D-structure;Adaptive immunity;Disulfide bond;Glycoprotein;Immunity;Membrane;MHC II;Reference proteome;Signal;Transmembrane;Transmembrane helix	adaptive immune response [GO:0002250]; antigen processing and presentation [GO:0019882]; antigen processing and presentation of exogenous peptide antigen via MHC class II [GO:0019886]; antigen processing and presentation of peptide antigen [GO:0048002]; negative regulation of T cell proliferation [GO:0042130]; peptide antigen assembly with MHC class II protein complex [GO:0002503]; positive regul…	MHC class II protein complex binding [GO:0023026]; peptide antigen binding [GO:0042605]; protein-containing complex binding [GO:0044877]	external side of plasma membrane [GO:0009897]; lysosome [GO:0005764]; MHC class II protein complex [GO:0042613]; plasma membrane [GO:0005886]		9677.02	9655.91	9958.13	10069.7	8672.16	8547.52	8789.62	9028.81	7873.01	7413.91	7133.85	8324.92	Antigen processing
P06339	H2-T23	HA15_MOUSE	P06339	H-2 class I histocompatibility antigen, D-37 alpha chain	H2-T23	FUNCTION: Involved in the presentation of foreign antigens to the immune system.	3D-structure;Disulfide bond;Glycoprotein;Immunity;Membrane;MHC I;Phosphoprotein;Reference proteome;Signal;Transmembrane;Transmembrane helix	antigen processing and presentation of endogenous peptide antigen via MHC class I via ER pathway, TAP-independent [GO:0002486]; antigen processing and presentation of endogenous peptide antigen via MHC class Ib [GO:0002476]; antigen processing and presentation of endogenous peptide antigen via MHC class Ib via ER pathway, TAP-dependent [GO:0002489]; immune response [GO:0006955]; inner ear develop…	beta-2-microglobulin binding [GO:0030881]; MHC class I protein binding [GO:0042288]; natural killer cell lectin-like receptor binding [GO:0046703]; peptide antigen binding [GO:0042605]; signaling receptor binding [GO:0005102]; T cell receptor binding [GO:0042608]	cell surface [GO:0009986]; external side of plasma membrane [GO:0009897]; extracellular space [GO:0005615]; lumenal side of endoplasmic reticulum membrane [GO:0098553]; MHC class I protein complex [GO:0042612]; MHC class Ib protein complex [GO:0032398]; phagocytic vesicle membrane [GO:0030670]; plasma membrane [GO:0005886]		306.1	354.61	320.919	137.838	174.624	198.454	178.525	194.988	123.592	191.309	143.168	174.35	Antigen processing
P07901	Hsp90aa1	HS90A_MOUSE	P07901	Heat shock protein HSP 90-alpha (EC 3.6.4.10) (Heat shock 86 kDa) (HSP 86) (HSP86) (Tumor-specific transplantation 86 kDa antigen) (TSTA)	Hsp90aa1 Hsp86 Hsp86-1 Hspca	FUNCTION: Molecular chaperone that promotes the maturation, structural maintenance and proper regulation of specific target proteins involved for instance in cell cycle control and signal transduction. Undergoes a functional cycle that is linked to its ATPase activity which is essential for its chaperone activity. This cycle probably induces conformational changes in the client proteins, thereby …	3D-structure;Acetylation;ATP-binding;Cell membrane;Chaperone;Cytoplasm;Direct protein sequencing;Hydrolase;Membrane;Mitochondrion;Nucleotide-binding;Nucleus;Phosphoprotein;Reference proteome;S-nitrosylation;Stress response;Ubl conjugation	activation of innate immune response [GO:0002218]; axon extension [GO:0048675]; cardiac muscle cell apoptotic process [GO:0010659]; cellular response to heat [GO:0034605]; cellular response to virus [GO:0098586]; central nervous system neuron axonogenesis [GO:0021955]; chaperone-mediated protein complex assembly [GO:0051131]; establishment of cell polarity [GO:0030010]; neuron migration [GO:00017…	ATP binding [GO:0005524]; ATP hydrolysis activity [GO:0016887]; ATP-dependent protein folding chaperone [GO:0140662]; CTP binding [GO:0002135]; dATP binding [GO:0032564]; disordered domain specific binding [GO:0097718]; DNA polymerase binding [GO:0070182]; GTP binding [GO:0005525]; GTPase binding [GO:0051020]; histone deacetylase binding [GO:0042826]; identical protein binding [GO:0042802]; mRNA …	apical plasma membrane [GO:0016324]; axonal growth cone [GO:0044295]; basolateral plasma membrane [GO:0016323]; brush border membrane [GO:0031526]; cell surface [GO:0009986]; collagen-containing extracellular matrix [GO:0062023]; cytoplasm [GO:0005737]; cytosol [GO:0005829]; dendritic growth cone [GO:0044294]; melanosome [GO:0042470]; mitochondrion [GO:0005739]; myelin sheath [GO:0043209]; neuron…		10054.3	10053.1	10502.4	9496.3	9638.17	8772	9972.94	9288.17	8682.4	9201.92	9692.03	9091.77	Antigen processing
P08228	Sod1	SODC_MOUSE	P08228	Superoxide dismutase [Cu-Zn] (EC 1.15.1.1)	Sod1	FUNCTION: Destroys radicals which are normally produced within the cells and which are toxic to biological systems.	3D-structure;Acetylation;Antioxidant;Copper;Cytoplasm;Direct protein sequencing;Disulfide bond;Lipoprotein;Metal-binding;Nucleus;Oxidoreductase;Palmitate;Phosphoprotein;Reference proteome;Zinc	anterograde axonal transport [GO:0008089]; apoptotic process [GO:0006915]; auditory receptor cell stereocilium organization [GO:0060088]; determination of adult lifespan [GO:0008340]; ectopic germ cell programmed cell death [GO:0035234]; embryo implantation [GO:0007566]; glutathione metabolic process [GO:0006749]; heart contraction [GO:0060047]; hydrogen peroxide biosynthetic process [GO:0050665]…	copper ion binding [GO:0005507]; enzyme binding [GO:0019899]; identical protein binding [GO:0042802]; ion binding [GO:0043167]; protein phosphatase 2B binding [GO:0030346]; protein-folding chaperone binding [GO:0051087]; small GTPase binding [GO:0031267]; superoxide dismutase activity [GO:0004784]; zinc ion binding [GO:0008270]	axon cytoplasm [GO:1904115]; cytoplasm [GO:0005737]; cytoplasmic vesicle [GO:0031410]; cytosol [GO:0005829]; dendrite cytoplasm [GO:0032839]; dense core granule [GO:0031045]; extracellular region [GO:0005576]; extracellular space [GO:0005615]; lysosome [GO:0005764]; mitochondrial intermembrane space [GO:0005758]; mitochondrion [GO:0005739]; myelin sheath [GO:0043209]; neuron projection [GO:004300…		16177.6	14752.1	14258.4	10749.6	13421.5	13021.8	13404.4	12985	13247.1	14441.3	14470.3	15210	Antigen processing
P11499	Hsp90ab1	HS90B_MOUSE	P11499	Heat shock protein HSP 90-beta (Heat shock 84 kDa) (HSP 84) (HSP84) (Tumor-specific transplantation 84 kDa antigen) (TSTA)	Hsp90ab1 Hsp84 Hsp84-1 Hspcb	FUNCTION: Molecular chaperone that promotes the maturation, structural maintenance and proper regulation of specific target proteins involved for instance in cell cycle control and signal transduction. Undergoes a functional cycle linked to its ATPase activity. This cycle probably induces conformational changes in the client proteins, thereby causing their activation. Interacts dynamically with v…	3D-structure;Acetylation;ATP-binding;Cell membrane;Chaperone;Cytoplasm;Direct protein sequencing;Glycoprotein;Membrane;Methylation;Nucleotide-binding;Nucleus;Phosphoprotein;Reference proteome;S-nitrosylation;Secreted;Stress response;Ubl conjugation	axon extension [GO:0048675]; cellular response to heat [GO:0034605]; cellular response to interleukin-4 [GO:0071353]; central nervous system neuron axonogenesis [GO:0021955]; chaperone-mediated protein complex assembly [GO:0051131]; establishment of cell polarity [GO:0030010]; negative regulation of apoptotic process [GO:0043066]; negative regulation of complement-dependent cytotoxicity [GO:19036…	ATP binding [GO:0005524]; ATP hydrolysis activity [GO:0016887]; ATP-dependent protein binding [GO:0043008]; ATP-dependent protein folding chaperone [GO:0140662]; CTP binding [GO:0002135]; dATP binding [GO:0032564]; disordered domain specific binding [GO:0097718]; DNA polymerase binding [GO:0070182]; double-stranded RNA binding [GO:0003725]; GTP binding [GO:0005525]; heat shock protein binding [GO…	apical plasma membrane [GO:0016324]; aryl hydrocarbon receptor complex [GO:0034751]; axonal growth cone [GO:0044295]; basolateral plasma membrane [GO:0016323]; brush border membrane [GO:0031526]; cell surface [GO:0009986]; COP9 signalosome [GO:0008180]; cytoplasm [GO:0005737]; cytosol [GO:0005829]; dendritic growth cone [GO:0044294]; dynein axonemal particle [GO:0120293]; extracellular region [GO…		51784.5	48436.3	52375.2	49154.4	53991.2	46624.2	51252	49277.9	48220.9	47227.6	48219.1	42785.4	Antigen processing
P14211	Calr	CALR_MOUSE	P14211	Calreticulin (CRP55) (Calregulin) (Endoplasmic reticulum resident protein 60) (ERp60) (HACBP)	Calr	FUNCTION: Calcium-binding chaperone that promotes folding, oligomeric assembly and quality control in the endoplasmic reticulum (ER) via the calreticulin/calnexin cycle. This lectin interacts transiently with almost all of the monoglucosylated glycoproteins that are synthesized in the ER (PubMed:20880849, PubMed:21652723). Interacts with the DNA-binding domain of NR3C1 and mediates its nuclear ex…	3D-structure;Acetylation;Calcium;Chaperone;Cytoplasm;Cytoplasmic vesicle;Direct protein sequencing;Disulfide bond;Endoplasmic reticulum;Extracellular matrix;Hydroxylation;Lectin;Lysosome;Metal-binding;Reference proteome;Repeat;Sarcoplasmic reticulum;Secreted;Signal;Zinc	cardiac muscle cell differentiation [GO:0055007]; cellular response to electrical stimulus [GO:0071257]; cellular response to lithium ion [GO:0071285]; cellular response to organic substance [GO:0071310]; cellular response to virus [GO:0098586]; cellular senescence [GO:0090398]; cortical actin cytoskeleton organization [GO:0030866]; negative regulation of DNA-templated transcription [GO:0045892];…	calcium ion binding [GO:0005509]; carbohydrate binding [GO:0030246]; complement component C1q complex binding [GO:0001849]; hormone binding [GO:0042562]; integrin binding [GO:0005178]; iron ion binding [GO:0005506]; mRNA binding [GO:0003729]; nuclear androgen receptor binding [GO:0050681]; nuclear export signal receptor activity [GO:0005049]; peptide binding [GO:0042277]; ubiquitin protein ligase…	acrosomal vesicle [GO:0001669]; cell surface [GO:0009986]; collagen-containing extracellular matrix [GO:0062023]; cortical granule [GO:0060473]; cytolytic granule [GO:0044194]; cytoplasm [GO:0005737]; cytosol [GO:0005829]; endoplasmic reticulum [GO:0005783]; endoplasmic reticulum lumen [GO:0005788]; endoplasmic reticulum membrane [GO:0005789]; endoplasmic reticulum quality control compartment [GO…		7181.91	7363.91	7548.44	6851.12	6524.18	7621.06	8496.13	8588.27	8007.28	7656.99	7337.86	7066.2	Antigen processing
P16627	Hspa1l	HS71L_MOUSE	P16627	Heat shock 70 kDa protein 1-like (Heat shock 70 kDa protein 1L) (Heat shock 70 kDa-like protein 1) (Spermatid-specific heat shock protein 70)	Hspa1l Hsc70t	FUNCTION: Molecular chaperone implicated in a wide variety of cellular processes, including protection of the proteome from stress, folding and transport of newly synthesized polypeptides, activation of proteolysis of misfolded proteins and the formation and dissociation of protein complexes. Plays a pivotal role in the protein quality control system, ensuring the correct folding of proteins, the…	ATP-binding;Developmental protein;Differentiation;Nucleotide-binding;Reference proteome;Spermatogenesis;Stress response	binding of sperm to zona pellucida [GO:0007339]; cell differentiation [GO:0030154]; chaperone cofactor-dependent protein refolding [GO:0051085]; positive regulation of protein targeting to mitochondrion [GO:1903955]; protein refolding [GO:0042026]; spermatogenesis [GO:0007283]	ATP binding [GO:0005524]; ATP hydrolysis activity [GO:0016887]; ATP-dependent protein folding chaperone [GO:0140662]; heat shock protein binding [GO:0031072]; protein folding chaperone [GO:0044183]; ubiquitin protein ligase binding [GO:0031625]; unfolded protein binding [GO:0051082]	cell body [GO:0044297]; COP9 signalosome [GO:0008180]; cytoplasm [GO:0005737]; cytosol [GO:0005829]; mitochondrial matrix [GO:0005759]; nucleus [GO:0005634]; zona pellucida receptor complex [GO:0002199]		7449.28	8233.31	6680.44	8530.9	8876.82	9179.29	10228.5	8198.95	8559.92	8894.38	9906.66	8403.59	Antigen processing
P17156	Hspa2	HSP72_MOUSE	P17156	Heat shock-related 70 kDa protein 2 (Heat shock protein 70.2)	Hspa2 Hcp70.2 Hsp70-2	FUNCTION: Molecular chaperone implicated in a wide variety of cellular processes, including protection of the proteome from stress, folding and transport of newly synthesized polypeptides, activation of proteolysis of misfolded proteins and the formation and dissociation of protein complexes. Plays a pivotal role in the protein quality control system, ensuring the correct folding of proteins, the…	ATP-binding;Chaperone;Cytoplasm;Cytoskeleton;Differentiation;Methylation;Nucleotide-binding;Phosphoprotein;Reference proteome;Spermatogenesis;Stress response	chaperone cofactor-dependent protein refolding [GO:0051085]; male meiosis I [GO:0007141]; male meiotic nuclear division [GO:0007140]; negative regulation of inclusion body assembly [GO:0090084]; positive regulation of ATP-dependent activity [GO:0032781]; positive regulation of ATPase-coupled calcium transmembrane transporter activity [GO:1901896]; positive regulation of G2/M transition of mitotic…	ATP binding [GO:0005524]; ATP hydrolysis activity [GO:0016887]; ATP-dependent protein folding chaperone [GO:0140662]; disordered domain specific binding [GO:0097718]; enzyme binding [GO:0019899]; glycolipid binding [GO:0051861]; heat shock protein binding [GO:0031072]; protein folding chaperone [GO:0044183]; protein-folding chaperone binding [GO:0051087]; tau protein binding [GO:0048156]; unfolde…	CatSper complex [GO:0036128]; cell surface [GO:0009986]; cytoplasm [GO:0005737]; cytosol [GO:0005829]; male germ cell nucleus [GO:0001673]; meiotic spindle [GO:0072687]; mitochondrion [GO:0005739]; myelin sheath [GO:0043209]; nucleoplasm [GO:0005654]; nucleus [GO:0005634]; plasma membrane [GO:0005886]; synaptonemal complex [GO:0000795]		320.722	483.119	490.904	397.421	439.346	355.507	382.8	339.232	419.324	222.612	559.833	393.816	Antigen processing
P20029	Hspa5	BIP_MOUSE	P20029	Endoplasmic reticulum chaperone BiP (EC 3.6.4.10) (78 kDa glucose-regulated protein) (GRP-78) (Binding-immunoglobulin protein) (BiP) (Heat shock protein 70 family protein 5) (HSP70 family protein 5) (Heat shock protein family A member 5) (Immunoglobulin heavy chain-binding protein)	Hspa5 Grp78	FUNCTION: Endoplasmic reticulum chaperone that plays a key role in protein folding and quality control in the endoplasmic reticulum lumen (PubMed:12411443, PubMed:12475965). Involved in the correct folding of proteins and degradation of misfolded proteins via its interaction with DNAJC10/ERdj5, probably to facilitate the release of DNAJC10/ERdj5 from its substrate (PubMed:12411443). Acts as a key…	Acetylation;ATP-binding;Chaperone;Cytoplasm;Direct protein sequencing;Endoplasmic reticulum;Hydrolase;Isopeptide bond;Methylation;Nitration;Nucleotide-binding;Phosphoprotein;Reference proteome;Signal;Ubl conjugation	cellular response to antibiotic [GO:0071236]; cellular response to calcium ion [GO:0071277]; cellular response to cAMP [GO:0071320]; cellular response to gamma radiation [GO:0071480]; cellular response to glucose starvation [GO:0042149]; cellular response to interleukin-4 [GO:0071353]; cellular response to manganese ion [GO:0071287]; cellular response to nerve growth factor stimulus [GO:1990090];…	ATP binding [GO:0005524]; ATP hydrolysis activity [GO:0016887]; ATP-dependent protein folding chaperone [GO:0140662]; enzyme binding [GO:0019899]; heat shock protein binding [GO:0031072]; misfolded protein binding [GO:0051787]; protein domain specific binding [GO:0019904]; protein folding chaperone [GO:0044183]; ribosome binding [GO:0043022]; ubiquitin protein ligase binding [GO:0031625]; unfolde…	cell surface [GO:0009986]; COP9 signalosome [GO:0008180]; cytoplasm [GO:0005737]; cytosol [GO:0005829]; endoplasmic reticulum [GO:0005783]; endoplasmic reticulum chaperone complex [GO:0034663]; endoplasmic reticulum lumen [GO:0005788]; endoplasmic reticulum membrane [GO:0005789]; endoplasmic reticulum-Golgi intermediate compartment [GO:0005793]; extracellular region [GO:0005576]; intracellular me…		6349.48	6276.28	6312.89	4917.66	5370.22	5305.3	5477.26	5208.45	5247.77	5118.13	5315.24	5184.25	Antigen processing
P21958	Tap1	TAP1_MOUSE	P21958	Antigen peptide transporter 1 (APT1) (EC 7.4.2.14) (ATP-binding cassette sub-family B member 2) (Histocompatibility antigen modifier 1) (Peptide transporter TAP1)	Tap1 Abcb2 Ham-1 Ham1	FUNCTION: ABC transporter associated with antigen processing. In complex with TAP2 mediates unidirectional translocation of peptide antigens from cytosol to endoplasmic reticulum (ER) for loading onto MHC class I (MHCI) molecules. Uses the chemical energy of ATP to export peptides against the concentration gradient. During the transport cycle alternates between 'inward-facing' state with peptide …	Adaptive immunity;ATP-binding;Endoplasmic reticulum;Immunity;Magnesium;Membrane;Metal-binding;Nucleotide-binding;Peptide transport;Protein transport;Reference proteome;Translocase;Transmembrane;Transmembrane helix;Transport	adaptive immune response [GO:0002250]; antigen processing and presentation of endogenous peptide antigen via MHC class I [GO:0019885]; cytosol to endoplasmic reticulum transport [GO:0046967]; defense response [GO:0006952]; peptide transport [GO:0015833]; protection from natural killer cell mediated cytotoxicity [GO:0042270]; protein transport [GO:0015031]; transmembrane transport [GO:0055085]	ABC-type peptide antigen transporter activity [GO:0015433]; ADP binding [GO:0043531]; ATP binding [GO:0005524]; ATP hydrolysis activity [GO:0016887]; ATPase-coupled transmembrane transporter activity [GO:0042626]; metal ion binding [GO:0046872]; MHC class I protein binding [GO:0042288]; MHC class Ib protein binding [GO:0023029]; nucleotide binding [GO:0000166]; peptide antigen binding [GO:0042605…	centriolar satellite [GO:0034451]; endoplasmic reticulum [GO:0005783]; endoplasmic reticulum membrane [GO:0005789]; intracellular membrane-bounded organelle [GO:0043231]; membrane [GO:0016020]; MHC class I peptide loading complex [GO:0042824]; mitochondrion [GO:0005739]; phagocytic vesicle membrane [GO:0030670]; TAP complex [GO:0042825]		1291.54	1216.43	1251.11	766.832	893.314	835.015	808.563	786.67	897.029	837.044	895.979	877.297	Antigen processing
P24527	Lta4h	LKHA4_MOUSE	P24527	Leukotriene A-4 hydrolase (LTA-4 hydrolase) (EC 3.3.2.6) (Leukotriene A(4) hydrolase) (Tripeptide aminopeptidase LTA4H) (EC 3.4.11.4)	Lta4h	FUNCTION: Bifunctional zinc metalloenzyme that comprises both epoxide hydrolase (EH) and aminopeptidase activities (By similarity). Acts as an epoxide hydrolase to catalyze the conversion of LTA4 to the pro-inflammatory mediator leukotriene B4 (LTB4) (PubMed:1881903, PubMed:9287304). Has also aminopeptidase activity, with high affinity for N-terminal arginines of various synthetic tripeptides (By…	Acetylation;Cytoplasm;Hydrolase;Leukotriene biosynthesis;Metal-binding;Metalloprotease;Phosphoprotein;Protease;Reference proteome;Zinc	leukotriene biosynthetic process [GO:0019370]; leukotriene metabolic process [GO:0006691]; peptide catabolic process [GO:0043171]; protein metabolic process [GO:0019538]; proteolysis [GO:0006508]; response to peptide hormone [GO:0043434]; response to zinc ion [GO:0010043]; type I pneumocyte differentiation [GO:0060509]	aminopeptidase activity [GO:0004177]; epoxide hydrolase activity [GO:0004301]; leukotriene-A4 hydrolase activity [GO:0004463]; metalloaminopeptidase activity [GO:0070006]; tripeptide aminopeptidase activity [GO:0045148]; zinc ion binding [GO:0008270]	cytoplasm [GO:0005737]; cytosol [GO:0005829]; nucleoplasm [GO:0005654]; nucleus [GO:0005634]	PATHWAY: Lipid metabolism; leukotriene B4 biosynthesis. {ECO:0000269|PubMed:1881903, ECO:0000269|PubMed:9287304}.	1689.69	1690.36	1872.22	1887.71	1904.87	1847.14	1889.73	1858.8	1892.57	2087.95	2047.62	2086.88	Antigen processing
P27773	Pdia3	PDIA3_MOUSE	P27773	Protein disulfide-isomerase A3 (EC 5.3.4.1) (58 kDa glucose-regulated protein) (58 kDa microsomal protein) (p58) (Disulfide isomerase ER-60) (Endoplasmic reticulum resident protein 57) (ER protein 57) (ERp57) (Endoplasmic reticulum resident protein 60) (ER protein 60) (ERp60)	Pdia3 Erp Erp60 Grp58	FUNCTION: Disulfide isomerase which catalyzes the formation, isomerization, and reduction or oxidation of disulfide bonds (By similarity). Associates with calcitriol, the active form of vitamin D3 which mediates the action of this vitamin on cells (By similarity). Association with calcitriol does not affect its enzymatic activity (By similarity). {ECO:0000250|UniProtKB:P30101}.	Acetylation;Direct protein sequencing;Disulfide bond;Endoplasmic reticulum;Isomerase;Methylation;Phosphoprotein;Redox-active center;Reference proteome;Repeat;Signal	cellular response to interleukin-7 [GO:0098761]; cellular response to vitamin D [GO:0071305]; extrinsic apoptotic signaling pathway [GO:0097191]; peptide antigen assembly with MHC class I protein complex [GO:0002502]; platelet aggregation [GO:0070527]; positive regulation of extrinsic apoptotic signaling pathway [GO:2001238]; positive regulation of protein folding [GO:1903334]; protein folding [G…	identical protein binding [GO:0042802]; MHC class I protein binding [GO:0042288]; peptidase activity [GO:0008233]; protein disulfide isomerase activity [GO:0003756]; protein-disulfide reductase (glutathione) activity [GO:0019153]; protein-disulfide reductase activity [GO:0015035]	acrosomal vesicle [GO:0001669]; apical plasma membrane [GO:0016324]; cell surface [GO:0009986]; cytoplasm [GO:0005737]; endoplasmic reticulum [GO:0005783]; endoplasmic reticulum lumen [GO:0005788]; extracellular region [GO:0005576]; extracellular space [GO:0005615]; melanosome [GO:0042470]; MHC class I peptide loading complex [GO:0042824]; mitochondrial intermembrane space [GO:0005758]; mitochond…		12608.7	11785.5	12299.6	10301.6	11124.5	10598.7	12372.3	11549.9	11961.2	12576.4	12766.2	12169.3	Antigen processing
P29758	Oat	OAT_MOUSE	P29758	Ornithine aminotransferase, mitochondrial (EC 2.6.1.13) (Ornithine--oxo-acid aminotransferase)	Oat	FUNCTION: Catalyzes the reversible interconversion of L-ornithine and 2-oxoglutarate to L-glutamate semialdehyde and L-glutamate. {ECO:0000250|UniProtKB:P04181}.	Acetylation;Aminotransferase;Direct protein sequencing;Mitochondrion;Pyridoxal phosphate;Reference proteome;Transferase;Transit peptide	arginine catabolic process to glutamate [GO:0019544]; arginine catabolic process to proline via ornithine [GO:0010121]; L-proline biosynthetic process [GO:0055129]	identical protein binding [GO:0042802]; ornithine(lysine) transaminase activity [GO:0050155]; ornithine-oxo-acid transaminase activity [GO:0004587]; pyridoxal phosphate binding [GO:0030170]	cytoplasm [GO:0005737]; mitochondrial matrix [GO:0005759]; mitochondrion [GO:0005739]; nucleoplasm [GO:0005654]	PATHWAY: Amino-acid biosynthesis; L-proline biosynthesis; L-glutamate 5-semialdehyde from L-ornithine: step 1/1. {ECO:0000250|UniProtKB:P04181}.	1612.01	1675.43	1662.93	1595.97	1681.65	1688.48	1689.64	1634.83	1740.89	1599.35	1605.07	1596.13	Antigen processing
P35564	Canx	CALX_MOUSE	P35564	Calnexin	Canx	FUNCTION: Calcium-binding protein that interacts with newly synthesized monoglucosylated glycoproteins in the endoplasmic reticulum. It may act in assisting protein assembly and/or in the retention within the ER of unassembled protein subunits. It seems to play a major role in the quality control apparatus of the ER by the retention of incorrectly folded proteins. Associated with partial T-cell a…	Acetylation;Calcium;Chaperone;Disulfide bond;Endoplasmic reticulum;Lectin;Lipoprotein;Membrane;Metal-binding;Palmitate;Phosphoprotein;Reference proteome;Repeat;Signal;Transmembrane;Transmembrane helix;Ubl conjugation	aging [GO:0007568]; clathrin-dependent endocytosis [GO:0072583]; protein folding [GO:0006457]; synaptic vesicle endocytosis [GO:0048488]; ubiquitin-dependent ERAD pathway [GO:0030433]	apolipoprotein binding [GO:0034185]; calcium ion binding [GO:0005509]; carbohydrate binding [GO:0030246]; ionotropic glutamate receptor binding [GO:0035255]; unfolded protein binding [GO:0051082]	axon [GO:0030424]; cytoplasm [GO:0005737]; dendrite cytoplasm [GO:0032839]; dendritic spine [GO:0043197]; endoplasmic reticulum [GO:0005783]; endoplasmic reticulum membrane [GO:0005789]; endoplasmic reticulum quality control compartment [GO:0044322]; glutamatergic synapse [GO:0098978]; lumenal side of endoplasmic reticulum membrane [GO:0098553]; melanosome [GO:0042470]; membrane [GO:0016020]; mit…		10599.5	10331.1	11091	9212.54	10445.5	10190.2	10529.5	9861.95	10378.7	10440.6	9856.46	9714.46	Antigen processing
P35737	H2-DMb1	DMB_MOUSE	P35737	Class II histocompatibility antigen, M beta 1 chain (H2-M beta 1 chain)	H2-DMb1 H-2Mb1 Mb	FUNCTION: Plays a critical role in catalyzing the release of class II-associated invariant chain peptide (CLIP) from newly synthesized MHC class II molecules and freeing the peptide binding site for acquisition of antigenic peptides. {ECO:0000250|UniProtKB:P28068}.	Adaptive immunity;Disulfide bond;Endosome;Glycoprotein;Immunity;Lysosome;Membrane;MHC II;Reference proteome;Signal;Transmembrane;Transmembrane helix	adaptive immune response [GO:0002250]; antigen processing and presentation [GO:0019882]; antigen processing and presentation of exogenous peptide antigen via MHC class II [GO:0019886]; chaperone cofactor-dependent protein refolding [GO:0051085]; MHC class II protein complex assembly [GO:0002399]; peptide antigen assembly with MHC class II protein complex [GO:0002503]; positive regulation of T cel…	MHC class II protein complex binding [GO:0023026]	intracellular membrane-bounded organelle [GO:0043231]; late endosome membrane [GO:0031902]; lysosomal membrane [GO:0005765]; MHC class II protein complex [GO:0042613]		224.208	221.805	289.176	286.533	196.989	195.756	226.327	211.508	189.627	135.434	144.377	186.322	Antigen processing
P36371	Tap2	TAP2_MOUSE	P36371	Antigen peptide transporter 2 (APT2) (EC 7.4.2.14) (ATP-binding cassette sub-family B member 3) (Histocompatibility antigen modifier 2)	Tap2 Abcb3 Ham-2 Ham2	FUNCTION: ABC transporter associated with antigen processing. In complex with TAP1 mediates unidirectional translocation of peptide antigens from cytosol to endoplasmic reticulum (ER) for loading onto MHC class I (MHCI) molecules. Uses the chemical energy of ATP to export peptides against the concentration gradient. During the transport cycle alternates between 'inward-facing' state with peptide …	Adaptive immunity;ATP-binding;Endoplasmic reticulum;Immunity;Magnesium;Membrane;Metal-binding;Nucleotide-binding;Peptide transport;Protein transport;Reference proteome;Translocase;Transmembrane;Transmembrane helix;Transport	antigen processing and presentation of endogenous peptide antigen via MHC class I [GO:0019885]; antigen processing and presentation of endogenous peptide antigen via MHC class I via ER pathway, TAP-dependent [GO:0002485]; antigen processing and presentation of endogenous peptide antigen via MHC class Ib via ER pathway, TAP-dependent [GO:0002489]; antigen processing and presentation of exogenous p…	ABC-type peptide antigen transporter activity [GO:0015433]; ADP binding [GO:0043531]; ATP binding [GO:0005524]; ATP hydrolysis activity [GO:0016887]; ATPase-coupled transmembrane transporter activity [GO:0042626]; identical protein binding [GO:0042802]; metal ion binding [GO:0046872]; MHC class I protein binding [GO:0042288]; MHC class Ib protein binding [GO:0023029]; nucleotide binding [GO:00001…	endoplasmic reticulum [GO:0005783]; endoplasmic reticulum membrane [GO:0005789]; intracellular membrane-bounded organelle [GO:0043231]; membrane [GO:0016020]; MHC class I peptide loading complex [GO:0042824]; nuclear speck [GO:0016607]; TAP complex [GO:0042825]		1054.99	1044.01	1019.86	823.402	866.899	782.223	720.199	721.365	752.923	777.246	733.516	804.935	Antigen processing
P41183	Bcl6	BCL6_MOUSE	P41183	B-cell lymphoma 6 protein homolog	Bcl6 Bcl-6	FUNCTION: Transcriptional repressor mainly required for germinal center (GC) formation and antibody affinity maturation which has different mechanisms of action specific to the lineage and biological functions. Forms complexes with different corepressors and histone deacetylases to repress the transcriptional expression of different subsets of target genes. Represses its target genes by binding d…	Acetylation;Activator;DNA-binding;Immunity;Inflammatory response;Metal-binding;Nucleus;Phosphoprotein;Reference proteome;Repeat;Repressor;Transcription;Transcription regulation;Ubl conjugation;Zinc;Zinc-finger	actin cytoskeleton organization [GO:0030036]; B cell differentiation [GO:0030183]; B cell proliferation [GO:0042100]; cell morphogenesis [GO:0000902]; cell motility [GO:0048870]; cell population proliferation [GO:0008283]; cell-matrix adhesion [GO:0007160]; DNA damage response [GO:0006974]; erythrocyte development [GO:0048821]; germinal center formation [GO:0002467]; heterochromatin formation [GO…	chromatin binding [GO:0003682]; chromatin DNA binding [GO:0031490]; DNA-binding transcription factor activity [GO:0003700]; DNA-binding transcription factor binding [GO:0140297]; DNA-binding transcription repressor activity, RNA polymerase II-specific [GO:0001227]; identical protein binding [GO:0042802]; intronic transcription regulatory region sequence-specific DNA binding [GO:0001161]; metal io…	Golgi apparatus [GO:0005794]; nucleolus [GO:0005730]; nucleoplasm [GO:0005654]; nucleus [GO:0005634]; paraspeckles [GO:0042382]; replication fork [GO:0005657]		563.701	301.871	227.493	709.517	739.098	745.609	595.728	565.618	675.943	574.153	486.814	581.487	Antigen processing
P63017	Hspa8	HSP7C_MOUSE	P63017	Heat shock cognate 71 kDa protein (EC 3.6.4.10) (Heat shock 70 kDa protein 8)	Hspa8 Hsc70 Hsc73	FUNCTION: Molecular chaperone implicated in a wide variety of cellular processes, including protection of the proteome from stress, folding and transport of newly synthesized polypeptides, chaperone-mediated autophagy, activation of proteolysis of misfolded proteins and the formation and dissociation of protein complexes. Plays a pivotal role in the protein quality control system, ensuring the co…	3D-structure;Acetylation;ATP-binding;Autophagy;Cell membrane;Chaperone;Cytoplasm;Direct protein sequencing;Hydrolase;Isopeptide bond;Lysosome;Membrane;Methylation;mRNA processing;mRNA splicing;Nucleotide-binding;Nucleus;Phosphoprotein;Reference proteome;Repressor;Spliceosome;Stress response;Transcription;Transcription regulation;Ubl conjugation	aging [GO:0007568]; ATP metabolic process [GO:0046034]; cellular response to cadmium ion [GO:0071276]; cellular response to heat [GO:0034605]; cerebellum development [GO:0021549]; chaperone cofactor-dependent protein refolding [GO:0051085]; chaperone-mediated autophagy [GO:0061684]; chaperone-mediated autophagy translocation complex disassembly [GO:1904764]; chaperone-mediated protein folding [GO…	A1 adenosine receptor binding [GO:0031686]; ADP binding [GO:0043531]; ATP binding [GO:0005524]; ATP hydrolysis activity [GO:0016887]; ATP-dependent protein disaggregase activity [GO:0140545]; ATP-dependent protein folding chaperone [GO:0140662]; C3HC4-type RING finger domain binding [GO:0055131]; clathrin-uncoating ATPase activity [GO:1990833]; enzyme binding [GO:0019899]; G protein-coupled recep…	asymmetric synapse [GO:0032279]; autophagosome [GO:0005776]; axon [GO:0030424]; cell surface [GO:0009986]; cytoplasm [GO:0005737]; cytosol [GO:0005829]; dendrite [GO:0030425]; dendritic shaft [GO:0043198]; dendritic spine [GO:0043197]; extracellular exosome [GO:0070062]; glutamatergic synapse [GO:0098978]; glycinergic synapse [GO:0098690]; intermediate filament [GO:0005882]; late endosome [GO:000…		35568.9	37917.7	37076.4	33329.2	35669.7	32625.1	37355.6	34131	33853.2	31116.9	31497.5	30507.3	Antigen processing
Q31093	H2-M3	Q31093_MOUSE	Q31093	Histocompatibility 2, M region locus 3 (MHC class I antigen H-2M3)	H2-M3 H-2M3		3D-structure;Glycoprotein;Membrane;Proteomics identification;Reference proteome;Signal;Transmembrane;Transmembrane helix	alpha-beta T cell activation involved in immune response [GO:0002287]; antigen processing and presentation of endogenous peptide antigen via MHC class I via ER pathway, TAP-independent [GO:0002486]; antigen processing and presentation of endogenous peptide antigen via MHC class Ib [GO:0002476]; antigen processing and presentation of exogenous peptide antigen via MHC class Ib [GO:0002477]; antigen…	CD8 receptor binding [GO:0042610]; identical protein binding [GO:0042802]; peptide antigen binding [GO:0042605]; protein homodimerization activity [GO:0042803]; signaling receptor binding [GO:0005102]	cis-Golgi network membrane [GO:0033106]; early endosome [GO:0005769]; external side of plasma membrane [GO:0009897]; extracellular space [GO:0005615]; MHC class Ib protein complex [GO:0032398]; plasma membrane [GO:0005886]		132.762	126.143	104.648	102.019	98.2717	77.022	78.2714	86.0265	97.21	103.793	234.534	148.062	Antigen processing
Q31099	H2-DMb2	Q31099_MOUSE	Q31099	H2-M beta 2 (H2-M beta 2 chain) (Histocompatibility 2, class II, locus Mb2) (MHC class II H2-M beta 2 chain) (MHC class II antigen Mb2)	H2-DMb2 H2-M beta2 H2-Mb2		3D-structure;Adaptive immunity;Glycoprotein;Immunity;Membrane;MHC II;Proteomics identification;Reference proteome;Signal;Transmembrane;Transmembrane helix	adaptive immune response [GO:0002250]; antigen processing and presentation [GO:0019882]; antigen processing and presentation of exogenous peptide antigen via MHC class II [GO:0019886]; chaperone cofactor-dependent protein refolding [GO:0051085]; MHC class II protein complex assembly [GO:0002399]; peptide antigen assembly with MHC class II protein complex [GO:0002503]; positive regulation of T cel…	MHC class II protein complex binding [GO:0023026]	endosome membrane [GO:0010008]; intracellular membrane-bounded organelle [GO:0043231]; late endosome [GO:0005770]; late endosome membrane [GO:0031902]; lysosomal membrane [GO:0005765]; lysosome [GO:0005764]; membrane [GO:0016020]; MHC class II protein complex [GO:0042613]; multivesicular body [GO:0005771]		2077.14	2084.97	2069.65	2219.04	1955.76	2241.5	2341.46	2270.31	2202.05	1693.34	1671.56	1738.66	Antigen processing
Q31621	H2-DMa	Q31621_MOUSE	Q31621	H2-M alpha (Histocompatibility 2, class II, locus DMa) (MAq1 protein) (MAq2 protein) (MAq3 protein) (MAq4 protein) (MAq5 protein) (MAq6 protein) (MHC class II H2-M alpha chain) (MHC class II antigen)	H2-DMa H2-M alpha H2-Ma MAq1 MAq2 MAq3 MAq4 MAq5 MAq6 MMMAq6		Adaptive immunity;Glycoprotein;Immunity;Membrane;MHC II;Proteomics identification;Reference proteome;Signal;Transmembrane;Transmembrane helix	adaptive immune response [GO:0002250]; antigen processing and presentation of exogenous peptide antigen via MHC class II [GO:0019886]; peptide antigen assembly with MHC class II protein complex [GO:0002503]; positive regulation of immune system process [GO:0002684]	MHC class II protein complex binding [GO:0023026]	cell surface [GO:0009986]; late endosome membrane [GO:0031902]; lysosomal membrane [GO:0005765]; MHC class II protein complex [GO:0042613]		238.331	274.849	262.973	268.026	244.699	340.55	245.818	263.566	310.15	219.14	156.509	237.604	Antigen processing
Q3U2G2	Hspa4	Q3U2G2_MOUSE	Q3U2G2	Heat shock 70 kDa protein 4	Hspa4		ATP-binding;Methylation;Nucleotide-binding;Proteomics identification;Reference proteome	chaperone-mediated protein complex assembly [GO:0051131]; protein insertion into mitochondrial outer membrane [GO:0045040]	ATP binding [GO:0005524]; ATP-dependent protein folding chaperone [GO:0140662]	cytosol [GO:0005829]; extracellular exosome [GO:0070062]; mitochondrion [GO:0005739]		8477.55	8634.95	8541.26	8296	8188.29	8234.41	8144.64	7579.99	7606.87	7262.42	7045.67	7456.78	Antigen processing
Q3US17	Znf48	ZNF48_MOUSE	Q3US17	Zinc finger protein 48 (Zinc finger protein 553)	Znf48 Zfp48 Zfp553 Znf553	FUNCTION: May be involved in transcriptional regulation.	Acetylation;DNA-binding;Isopeptide bond;Metal-binding;Nucleus;Phosphoprotein;Reference proteome;Repeat;Transcription;Transcription regulation;Ubl conjugation;Zinc;Zinc-finger		DNA-binding transcription activator activity, RNA polymerase II-specific [GO:0001228]; identical protein binding [GO:0042802]; metal ion binding [GO:0046872]; RNA polymerase II cis-regulatory region sequence-specific DNA binding [GO:0000978]	nucleus [GO:0005634]		273.96	304.076	330.316	297.941	280.298	311.469	252.651	312.323	334.759	301.845	305.605	259.528	Antigen processing
Q3UUV9	H2-Eb2	Q3UUV9_MOUSE	Q3UUV9	Histocompatibility 2, class II antigen E beta2	H2-Eb2 CR974457.1-001		Adaptive immunity;Glycoprotein;Immunity;Membrane;MHC II;Proteomics identification;Reference proteome;Transmembrane;Transmembrane helix	adaptive immune response [GO:0002250]; antigen processing and presentation of exogenous peptide antigen via MHC class II [GO:0019886]; peptide antigen assembly with MHC class II protein complex [GO:0002503]; positive regulation of T cell activation [GO:0050870]	CD4 receptor binding [GO:0042609]; MHC class II protein complex binding [GO:0023026]; MHC class II receptor activity [GO:0032395]; peptide antigen binding [GO:0042605]; polysaccharide binding [GO:0030247]; T cell receptor binding [GO:0042608]	cell surface [GO:0009986]; external side of plasma membrane [GO:0009897]; immunological synapse [GO:0001772]; late endosome membrane [GO:0031902]; lysosomal membrane [GO:0005765]; MHC class II protein complex [GO:0042613]; plasma membrane [GO:0005886]		321.062	284.539	282.607	268.228	271.645	292.091	278.198	312.226	384.815	253.794	296.312	258.964	Antigen processing
Q60876	Eif4ebp1	4EBP1_MOUSE	Q60876	Eukaryotic translation initiation factor 4E-binding protein 1 (4E-BP1) (eIF4E-binding protein 1) (Phosphorylated heat- and acid-stable protein regulated by insulin 1) (PHAS-I)	Eif4ebp1	FUNCTION: Repressor of translation initiation that regulates EIF4E activity by preventing its assembly into the eIF4F complex: hypophosphorylated form competes with EIF4G1/EIF4G3 and strongly binds to EIF4E, leading to repress translation. In contrast, hyperphosphorylated form dissociates from EIF4E, allowing interaction between EIF4G1/EIF4G3 and EIF4E, leading to initiation of translation (By si…	Acetylation;Isopeptide bond;Phosphoprotein;Protein synthesis inhibitor;Reference proteome;Translation regulation;Ubl conjugation	cellular response to dexamethasone stimulus [GO:0071549]; cellular response to hypoxia [GO:0071456]; G1/S transition of mitotic cell cycle [GO:0000082]; insulin receptor signaling pathway [GO:0008286]; IRES-dependent translational initiation of linear mRNA [GO:0002192]; lung development [GO:0030324]; negative regulation of protein-containing complex assembly [GO:0031333]; negative regulation of t…	eukaryotic initiation factor 4E binding [GO:0008190]; protein phosphatase 2A binding [GO:0051721]; translation initiation factor binding [GO:0031369]; translation repressor activity [GO:0030371]	cytoplasm [GO:0005737]; cytosol [GO:0005829]; glutamatergic synapse [GO:0098978]; nucleus [GO:0005634]; postsynaptic cytosol [GO:0099524]; protein-containing complex [GO:0032991]		218.623	273.919	234.986	170.328	228.391	249.058	245.943	225.993	286.797	293.16	283.912	223.674	Antigen processing
Q9CPX6	Atg3	ATG3_MOUSE	Q9CPX6	Ubiquitin-like-conjugating enzyme ATG3 (EC 2.3.2.-) (Autophagy-related protein 3) (APG3-like)	Atg3 Apg3l	FUNCTION: E2 conjugating enzyme required for the cytoplasm to vacuole transport (Cvt), autophagy, and mitochondrial homeostasis. Responsible for the E2-like covalent binding of phosphatidylethanolamine to the C-terminal Gly of ATG8-like proteins (GABARAP, GABARAPL1, GABARAPL2 or MAP1LC3A). The ATG12-ATG5 conjugate plays a role of an E3 and promotes the transfer of ATG8-like proteins from ATG3 to …	Acetylation;Autophagy;Cytoplasm;Isopeptide bond;Protein transport;Reference proteome;Transferase;Transport;Ubl conjugation;Ubl conjugation pathway	autophagosome assembly [GO:0000045]; autophagy of mitochondrion [GO:0000422]; autophagy of nucleus [GO:0044804]; macroautophagy [GO:0016236]; mitochondrial fragmentation involved in apoptotic process [GO:0043653]; negative regulation of phagocytosis [GO:0050765]; protein modification process [GO:0036211]; protein transport [GO:0015031]; protein ubiquitination [GO:0016567]; regulation of cilium as…	Atg12 transferase activity [GO:0019777]; Atg8 ligase activity [GO:0019776]; enzyme binding [GO:0019899]; ubiquitin-like protein transferase activity [GO:0019787]	cytoplasm [GO:0005737]; cytoplasmic ubiquitin ligase complex [GO:0000153]; cytosol [GO:0005829]; phagophore assembly site [GO:0000407]		563.964	522.92	569.99	601.626	534.628	477.423	471.316	516.968	448.897	516.158	477.71	521.573	Antigen processing
Q9JHW4	Eefsec	SELB_MOUSE	Q9JHW4	Selenocysteine-specific elongation factor (Elongation factor sec) (Eukaryotic elongation factor, selenocysteine-tRNA-specific) (mSelB)	Eefsec Selb	FUNCTION: Translation factor necessary for the incorporation of selenocysteine into proteins. It probably replaces EF-Tu for the insertion of selenocysteine directed by the UGA codon. SelB binds GTP and GDP.	Cytoplasm;GTP-binding;Methylation;Nucleotide-binding;Nucleus;Phosphoprotein;Protein biosynthesis;Reference proteome	selenocysteine incorporation [GO:0001514]	GTP binding [GO:0005525]; GTPase activity [GO:0003924]; ribonucleoprotein complex binding [GO:0043021]; selenocysteine insertion sequence binding [GO:0035368]; translation elongation factor activity [GO:0003746]; tRNA binding [GO:0000049]	cytosol [GO:0005829]; mitochondrion [GO:0005739]; nucleus [GO:0005634]; ribonucleoprotein complex [GO:1990904]		852.227	914.303	814.125	895.645	907.396	824.377	782.69	773.558	956.614	888.473	814.309	903.958	Antigen processing
Q9QWV1	H2-Oa	Q9QWV1_MOUSE	Q9QWV1	H2-O alpha (Histocompatibility 2, O region alpha locus)	H2-Oa H2-Oalpha		Adaptive immunity;Glycoprotein;Immunity;Membrane;MHC II;Proteomics identification;Reference proteome;Signal;Transmembrane;Transmembrane helix	adaptive immune response [GO:0002250]; antigen processing and presentation [GO:0019882]; antigen processing and presentation of exogenous peptide antigen via MHC class II [GO:0019886]; negative regulation of antigen processing and presentation of peptide antigen via MHC class II [GO:0002587]; peptide antigen assembly with MHC class II protein complex [GO:0002503]; positive regulation of T cell ac…	MHC class II protein complex binding [GO:0023026]	MHC class II protein complex [GO:0042613]		271.832	186.304	161.291	205.95	203.827	209.766	164.4	191.711	217.233	149.911	179.904	176.02	Antigen processing
Q9R233	Tapbp	TPSN_MOUSE	Q9R233	Tapasin (TPN) (TPSN) (TAP-associated protein) (TAP-binding protein)	Tapbp Tapa	FUNCTION: Involved in the association of MHC class I with transporter associated with antigen processing (TAP) and in the assembly of MHC class I with peptide (peptide loading).	3D-structure;Alternative splicing;Disulfide bond;Endoplasmic reticulum;Glycoprotein;Immunoglobulin domain;Membrane;Reference proteome;Signal;Transmembrane;Transmembrane helix	antigen processing and presentation of endogenous peptide antigen via MHC class I [GO:0019885]; antigen processing and presentation of exogenous peptide antigen via MHC class I, TAP-dependent [GO:0002479]; defense response [GO:0006952]; MHC class I protein complex assembly [GO:0002397]; MHC class Ib protein complex assembly [GO:0002398]; peptide antigen assembly with MHC class I protein complex […	molecular adaptor activity [GO:0060090]; TAP complex binding [GO:0062061]; TAP1 binding [GO:0046978]; TAP2 binding [GO:0046979]	endoplasmic reticulum membrane [GO:0005789]; Golgi membrane [GO:0000139]; MHC class I peptide loading complex [GO:0042824]; phagocytic vesicle membrane [GO:0030670]; plasma membrane [GO:0005886]; Tapasin-ERp57 complex [GO:0061779]		365.329	367.544	362.257	241.331	249.806	232.66	235.643	264.927	251.887	298.02	319.318	286.271	Antigen processing
Q9WU03	Spint2	SPIT2_MOUSE	Q9WU03	Kunitz-type protease inhibitor 2 (Hepatocyte growth factor activator inhibitor type 2) (HAI-2)	Spint2 Hai2	FUNCTION: Inhibitor of HGF activator.	Alternative splicing;Disulfide bond;Glycoprotein;Membrane;Protease inhibitor;Reference proteome;Repeat;Serine protease inhibitor;Signal;Transmembrane;Transmembrane helix	basement membrane organization [GO:0071711]; epithelial cell morphogenesis involved in placental branching [GO:0060672]; establishment or maintenance of cell polarity [GO:0007163]; negative regulation of cell motility [GO:2000146]; negative regulation of cell-cell adhesion [GO:0022408]; negative regulation of neural precursor cell proliferation [GO:2000178]; negative regulation of peptidase activ…	serine-type endopeptidase inhibitor activity [GO:0004867]	cytoplasm [GO:0005737]; plasma membrane [GO:0005886]	PATHWAY: Protein modification; protein ubiquitination.	126.694	160.812	96.8491	109.165	123.887	110.215	146.265	120.997	137.274	138.033	150.373	129.6	Antigen processing
Q91X58	Zfand2b	A0A087WPF5_MOUSE;E0CY18_MOUSE;ZFN2B_MOUSE	Q91X58	AN1-type zinc finger protein 2B (Arsenite-inducible RNA-associated protein-like protein) (AIRAP-like protein)	Zfand2b Airapl	FUNCTION: Plays a role in protein homeostasis by regulating both the translocation and the ubiquitin-mediated proteasomal degradation of nascent proteins at the endoplasmic reticulum (PubMed:24160817, PubMed:26337389, PubMed:26692333). It is involved in the regulation of signal-mediated translocation of proteins into the endoplasmic reticulum (PubMed:24160817). It also plays a role in the ubiquit…	3D-structure;Endoplasmic reticulum;Lipoprotein;Membrane;Metal-binding;Methylation;Phosphoprotein;Prenylation;Reference proteome;Repeat;Zinc;Zinc-finger	proteasome-mediated ubiquitin-dependent protein catabolic process [GO:0043161]; protein targeting to ER [GO:0045047]; regulation of insulin-like growth factor receptor signaling pathway [GO:0043567]; SRP-dependent cotranslational protein targeting to membrane, translocation [GO:0006616]	K48-linked polyubiquitin modification-dependent protein binding [GO:0036435]; polyubiquitin modification-dependent protein binding [GO:0031593]; ubiquitin binding [GO:0043130]; zinc ion binding [GO:0008270]	cytoplasm [GO:0005737]; endoplasmic reticulum [GO:0005783]; endoplasmic reticulum membrane [GO:0005789]; membrane [GO:0016020]; proteasome complex [GO:0000502]		354.369	369.688	292.136	265.133	303.618	279.115	299.605	264.196	255.893	257.82	263.993	336.093	proteasome complex
Q9JKV1	Gm9774	A0A0A6YVU8_MOUSE;ADRM1_MOUSE	Q9JKV1	Proteasomal ubiquitin receptor ADRM1 (110 kDa cell membrane glycoprotein) (Gp110) (Adhesion-regulating molecule 1) (ARM-1) (Rpn13 homolog)	Adrm1 Gp110	FUNCTION: Component of the 26S proteasome, a multiprotein complex involved in the ATP-dependent degradation of ubiquitinated proteins (PubMed:18497827). This complex plays a key role in the maintenance of protein homeostasis by removing misfolded or damaged proteins, which could impair cellular functions, and by removing proteins whose functions are no longer required (PubMed:18497827). Therefore…	3D-structure;Acetylation;Cytoplasm;Isopeptide bond;Nucleus;Phosphoprotein;Proteasome;Reference proteome;Ubl conjugation	adipose tissue development [GO:0060612]; follicle-stimulating hormone signaling pathway [GO:0042699]; oogenesis [GO:0048477]; ovarian follicle development [GO:0001541]; positive regulation of growth hormone receptor signaling pathway [GO:0060399]; proteasome assembly [GO:0043248]; regulation of T cell differentiation in thymus [GO:0033081]; seminiferous tubule development [GO:0072520]; Sertoli ce…	endopeptidase activator activity [GO:0061133]; molecular function inhibitor activity [GO:0140678]; protease binding [GO:0002020]; proteasome binding [GO:0070628]	cytosol [GO:0005829]; nucleoplasm [GO:0005654]; plasma membrane [GO:0005886]; proteasome complex [GO:0000502]; proteasome regulatory particle, lid subcomplex [GO:0008541]		857.475	1015.21	1047.37	987.668	1056.52	1042.87	907.585	908.429	926.326	793.984	714.383	796.181	proteasome complex&proteasome regulatory particle
Q9CR00	Psmd9	A0A0G2JGN6_MOUSE;PSMD9_MOUSE	Q9CR00	26S proteasome non-ATPase regulatory subunit 9 (26S proteasome regulatory subunit p27)	Psmd9	FUNCTION: Acts as a chaperone during the assembly of the 26S proteasome, specifically of the base subcomplex of the PA700/19S regulatory complex (RC). During the base subcomplex assembly is part of an intermediate PSMD9:PSMC6:PSMC3 module, also known as modulator trimer complex; PSMD9 is released during the further base assembly process (By similarity). {ECO:0000250}.	Chaperone;Phosphoprotein;Reference proteome	negative regulation of insulin secretion [GO:0046676]; positive regulation of DNA-templated transcription [GO:0045893]; positive regulation of insulin secretion [GO:0032024]; positive regulation of transcription by RNA polymerase II [GO:0045944]; proteasome regulatory particle assembly [GO:0070682]; proteolysis [GO:0006508]; type B pancreatic cell apoptotic process [GO:0097050]	bHLH transcription factor binding [GO:0043425]; transcription coactivator activity [GO:0003713]	cytoplasm [GO:0005737]; nucleus [GO:0005634]; proteasome regulatory particle, base subcomplex [GO:0008540]		342.898	311.589	293.016	264.16	288.995	269.086	301.99	253.125	276.87	411.254	438.516	592.143	proteasome complex&proteasome regulatory particle
Q9CYN2	Spcs2	A0A140LHG8_MOUSE;A0A140LHR3_MOUSE;A0A140LJ01_MOUSE;A0A140LJG6_MOUSE;SPCS2_MOUSE	Q9CYN2	Signal peptidase complex subunit 2 (Microsomal signal peptidase 25 kDa subunit) (SPase 25 kDa subunit)	Spcs2 Spc25	FUNCTION: Component of the signal peptidase complex (SPC) which catalyzes the cleavage of N-terminal signal sequences from nascent proteins as they are translocated into the lumen of the endoplasmic reticulum (By similarity). Enhances the enzymatic activity of SPC and facilitates the interactions between different components of the translocation site (By similarity). {ECO:0000250|UniProtKB:Q04969…	Acetylation;Endoplasmic reticulum;Membrane;Reference proteome;Transmembrane;Transmembrane helix	protein targeting to ER [GO:0045047]; signal peptide processing [GO:0006465]		signal peptidase complex [GO:0005787]		1392.8	1261.68	1235.39	1354.67	1220.48	1159.63	1230.86	1320.84	1610	1557.23	1281.13	1446.25	peptidase complex
A0A2I3BRW0	Spcs1	A0A2I3BRW0_MOUSE	A0A2I3BRW0	Signal peptidase complex subunit 1 (Microsomal signal peptidase 12 kDa subunit)	Spcs1		Endoplasmic reticulum;Membrane;Proteomics identification;Reference proteome;Transmembrane;Transmembrane helix	signal peptide processing [GO:0006465]		signal peptidase complex [GO:0005787]		1112.53	1117.33	1145.53	954.122	1111.6	923.42	906.052	926.298	985.099	846.812	762.916	909.145	peptidase complex
Q9Z2U0	Psma7	A0A338P7D7_MOUSE;PSA7_MOUSE	Q9Z2U0	Proteasome subunit alpha type-7 (Proteasome subunit RC6-1)	Psma7	FUNCTION: Component of the 20S core proteasome complex involved in the proteolytic degradation of most intracellular proteins. This complex plays numerous essential roles within the cell by associating with different regulatory particles. Associated with two 19S regulatory particles, forms the 26S proteasome and thus participates in the ATP-dependent degradation of ubiquitinated proteins. The 26S…	3D-structure;Acetylation;Cytoplasm;Direct protein sequencing;Glycoprotein;Nucleus;Phosphoprotein;Proteasome;Reference proteome	ubiquitin-dependent protein catabolic process [GO:0006511]	identical protein binding [GO:0042802]	cytoplasm [GO:0005737]; cytosol [GO:0005829]; nucleoplasm [GO:0005654]; nucleus [GO:0005634]; postsynapse [GO:0098794]; proteasome complex [GO:0000502]; proteasome core complex [GO:0005839]; proteasome core complex, alpha-subunit complex [GO:0019773]		3304.45	3201.46	3682.1	2810.94	3080.9	2795.62	2847.3	2812.12	2769.15	2842.56	2736.17	2714.15	proteasome complex
Q8CDN6	Txnl1	A0A498WGD8_MOUSE;TXNL1_MOUSE	Q8CDN6	Thioredoxin-like protein 1 (32 kDa thioredoxin-related protein)	Txnl1 Trp32 Txnl	FUNCTION: Active thioredoxin with a redox potential of about -250 mV. {ECO:0000250}.	Cytoplasm;Disulfide bond;Electron transport;Nucleus;Phosphoprotein;Proteasome;Redox-active center;Reference proteome;Transport		disulfide oxidoreductase activity [GO:0015036]; protein-disulfide reductase activity [GO:0015035]	cytoplasm [GO:0005737]; cytosol [GO:0005829]; nucleus [GO:0005634]; proteasome complex [GO:0000502]		1166.08	1275.88	1152.55	1365.54	1210.24	1230.89	1126.17	1164.54	1056.78	1128.9	1040.93	1044.4	proteasome complex
P57080	Usp25	A0A5F8MPP4_MOUSE;UBP25_MOUSE	P57080	Ubiquitin carboxyl-terminal hydrolase 25 (EC 3.4.19.12) (Deubiquitinating enzyme 25) (Ubiquitin thioesterase 25) (Ubiquitin-specific-processing protease 25) (mUSP25)	Usp25	FUNCTION: Deubiquitinating enzyme that hydrolyzes ubiquitin moieties conjugated to substrates and thus, functions to process newly synthesized Ubiquitin, to recycle ubiquitin molecules or to edit polyubiquitin chains and prevents proteasomal degradation of substrates. Hydrolyzes both 'Lys-48'- and 'Lys-63'-linked tetraubiquitin chains (By similarity). {ECO:0000250}.; FUNCTION: The muscle-specific…	3D-structure;Alternative splicing;Coiled coil;Cytoplasm;Hydrolase;Isopeptide bond;Nucleus;Phosphoprotein;Protease;Reference proteome;Repeat;Thiol protease;Ubl conjugation;Ubl conjugation pathway	I-kappaB phosphorylation [GO:0007252]; immune response [GO:0006955]; interleukin-17-mediated signaling pathway [GO:0097400]; mRNA metabolic process [GO:0016071]; negative regulation of ERAD pathway [GO:1904293]; protein deubiquitination [GO:0016579]; protein K48-linked deubiquitination [GO:0071108]; protein K63-linked deubiquitination [GO:0070536]; regulation of protein stability [GO:0031647]; re…	ATPase binding [GO:0051117]; cysteine-type deubiquitinase activity [GO:0004843]; cysteine-type endopeptidase activity [GO:0004197]; SUMO binding [GO:0032183]; ubiquitin protein ligase binding [GO:0031625]	cytosol [GO:0005829]; endoplasmic reticulum [GO:0005783]; nucleus [GO:0005634]; proteasome complex [GO:0000502]		304.958	346.9	258.985	258.512	266.381	253.29	246.753	256.386	260.094	410.758	522.535	393.697	proteasome complex
O88685	Psmc3	A2AGN7_MOUSE;PRS6A_MOUSE	O88685	26S proteasome regulatory subunit 6A (26S proteasome AAA-ATPase subunit RPT5) (Proteasome 26S subunit ATPase 3) (Tat-binding protein 1) (TBP-1)	Psmc3 Tbp1	FUNCTION: Component of the 26S proteasome, a multiprotein complex involved in the ATP-dependent degradation of ubiquitinated proteins. This complex plays a key role in the maintenance of protein homeostasis by removing misfolded or damaged proteins, which could impair cellular functions, and by removing proteins whose functions are no longer required. Therefore, the proteasome participates in num…	ATP-binding;Cytoplasm;Nucleotide-binding;Nucleus;Phosphoprotein;Proteasome;Reference proteome	blastocyst development [GO:0001824]; modulation by host of viral transcription [GO:0043921]; positive regulation of transcription by RNA polymerase II [GO:0045944]; proteasome-mediated ubiquitin-dependent protein catabolic process [GO:0043161]	ATP binding [GO:0005524]; ATP hydrolysis activity [GO:0016887]; identical protein binding [GO:0042802]; proteasome-activating activity [GO:0036402]	cytoplasm [GO:0005737]; nucleus [GO:0005634]; P-body [GO:0000932]; perinuclear region of cytoplasm [GO:0048471]; proteasome accessory complex [GO:0022624]; proteasome complex [GO:0000502]; proteasome regulatory particle, base subcomplex [GO:0008540]		5218.24	5543.84	5377.65	4961.62	5265.71	5336.76	5541	5136.99	5622.86	5428.47	4999.59	5517.85	proteasome complex&proteasome regulatory particle&proteasome accessory complex
Q9R0P6	Sec11a	D3YTS1_MOUSE;D3YWT0_MOUSE;D3Z569_MOUSE;SC11A_MOUSE	Q9R0P6	Signal peptidase complex catalytic subunit SEC11A (EC 3.4.21.89) (Endopeptidase SP18) (Microsomal signal peptidase 18 kDa subunit) (SPase 18 kDa subunit) (SEC11 homolog A) (SEC11-like protein 1) (SPC18) (Sid 2895)	Sec11a Sec11l1 Sid2895 Spc18	FUNCTION: Catalytic component of the signal peptidase complex (SPC) which catalyzes the cleavage of N-terminal signal sequences from nascent proteins as they are translocated into the lumen of the endoplasmic reticulum. Specifically cleaves N-terminal signal peptides that contain a hydrophobic alpha-helix (h-region) shorter than 18-20 amino acids. {ECO:0000250|UniProtKB:P67812}.	Endoplasmic reticulum;Hydrolase;Membrane;Protease;Reference proteome;Signal-anchor;Transmembrane;Transmembrane helix	signal peptide processing [GO:0006465]	peptidase activity [GO:0008233]; serine-type endopeptidase activity [GO:0004252]	signal peptidase complex [GO:0005787]		1165.85	1121.38	1149.94	1056.39	1061.37	975.949	892.962	871.641	841.783	1057.85	1034.41	987.529	peptidase complex
Q9D8V7	Sec11c	D3Z5H3_MOUSE;SC11C_MOUSE	Q9D8V7	Signal peptidase complex catalytic subunit SEC11C (EC 3.4.21.89) (Microsomal signal peptidase 21 kDa subunit) (SPase 21 kDa subunit) (SEC11 homolog C) (SEC11-like protein 3) (SPC21)	Sec11c Sec11l3 Spc21	FUNCTION: Catalytic component of the signal peptidase complex (SPC) which catalyzes the cleavage of N-terminal signal sequences from nascent proteins as they are translocated into the lumen of the endoplasmic reticulum. Specifically cleaves N-terminal signal peptides that contain a hydrophobic alpha-helix (h-region) shorter than 18-20 amino acids. {ECO:0000250|UniProtKB:Q9BY50}.	Endoplasmic reticulum;Hydrolase;Membrane;Protease;Reference proteome;Signal-anchor;Transmembrane;Transmembrane helix	signal peptide processing [GO:0006465]	peptidase activity [GO:0008233]; serine-type endopeptidase activity [GO:0004252]	signal peptidase complex [GO:0005787]		336.104	283.946	304.98	470.819	327.409	339.736	268.567	323.64	270.489	296.629	295.363	280.694	peptidase complex
Q9R1P0	Psma4	E9PW69_MOUSE;PSA4_MOUSE	Q9R1P0	Proteasome subunit alpha type-4 (Macropain subunit C9) (Multicatalytic endopeptidase complex subunit C9) (Proteasome component C9) (Proteasome subunit L)	Psma4	FUNCTION: Component of the 20S core proteasome complex involved in the proteolytic degradation of most intracellular proteins. This complex plays numerous essential roles within the cell by associating with different regulatory particles. Associated with two 19S regulatory particles, forms the 26S proteasome and thus participates in the ATP-dependent degradation of ubiquitinated proteins. The 26S…	3D-structure;Acetylation;Cytoplasm;Direct protein sequencing;Nucleus;Phosphoprotein;Proteasome;Reference proteome	ubiquitin-dependent protein catabolic process [GO:0006511]		cytoplasm [GO:0005737]; cytosol [GO:0005829]; intracellular membrane-bounded organelle [GO:0043231]; nucleoplasm [GO:0005654]; nucleus [GO:0005634]; P-body [GO:0000932]; proteasome complex [GO:0000502]; proteasome core complex [GO:0005839]; proteasome core complex, alpha-subunit complex [GO:0019773]		1001.71	1037.51	1011.48	760.655	838.152	837.237	742.748	770.356	653.916	751.393	788.033	710.32	proteasome complex
F7AI87	Psmd4	F7AI87_MOUSE	F7AI87	Proteasome (prosome, macropain) 26S subunit, non-ATPase, 4	Psmd4		Proteomics identification;Reference proteome	ubiquitin-dependent protein catabolic process [GO:0006511]		proteasome regulatory particle, base subcomplex [GO:0008540]		815.279	549.477	459.648	359.738	343.734	314.163	350.554	312.072	297.348	436.411	381.276	413.861	proteasome complex&proteasome regulatory particle
P19221	F2	H7BX99_MOUSE;THRB_MOUSE	P19221	Prothrombin (EC 3.4.21.5) (Coagulation factor II) [Cleaved into: Activation peptide fragment 1; Activation peptide fragment 2; Thrombin light chain; Thrombin heavy chain]	F2 Cf2	FUNCTION: Thrombin, which cleaves bonds after Arg and Lys, converts fibrinogen to fibrin and activates factors V, VII, VIII, XIII, and, in complex with thrombomodulin, protein C. Functions in blood homeostasis, inflammation and wound healing (By similarity). {ECO:0000250}.	3D-structure;Acute phase;Blood coagulation;Calcium;Cleavage on pair of basic residues;Disulfide bond;Gamma-carboxyglutamic acid;Glycoprotein;Hemostasis;Hydrolase;Kringle;Protease;Reference proteome;Repeat;Serine protease;Signal;Zymogen	acute-phase response [GO:0006953]; antimicrobial humoral immune response mediated by antimicrobial peptide [GO:0061844]; blood coagulation [GO:0007596]; blood coagulation, common pathway [GO:0072377]; cell surface receptor signaling pathway [GO:0007166]; cytolysis by host of symbiont cells [GO:0051838]; fibrinolysis [GO:0042730]; ion channel modulating, G protein-coupled receptor signaling pathwa…	calcium ion binding [GO:0005509]; endopeptidase activity [GO:0004175]; heparin binding [GO:0008201]; lipopolysaccharide binding [GO:0001530]; molecular function activator activity [GO:0140677]; peptidase activity [GO:0008233]; serine-type endopeptidase activity [GO:0004252]; signaling receptor binding [GO:0005102]; thrombospondin receptor activity [GO:0070053]	collagen-containing extracellular matrix [GO:0062023]; external side of plasma membrane [GO:0009897]; extracellular space [GO:0005615]; serine-type endopeptidase complex [GO:1905370]		467.214	515.52	500.566	526.767	445.42	705.443	432.737	526.94	543.506	530.632	515.803	611.252	peptidase complex&endopeptidase complex
O35226	Psmd4	PSMD4_MOUSE	O35226	26S proteasome non-ATPase regulatory subunit 4 (26S proteasome regulatory subunit RPN10) (26S proteasome regulatory subunit S5A) (Multiubiquitin chain-binding protein)	Psmd4 Mcb1	FUNCTION: Component of the 26S proteasome, a multiprotein complex involved in the ATP-dependent degradation of ubiquitinated proteins. This complex plays a key role in the maintenance of protein homeostasis by removing misfolded or damaged proteins, which could impair cellular functions, and by removing proteins whose functions are no longer required. Therefore, the proteasome participates in num…	Alternative splicing;Isopeptide bond;Phosphoprotein;Proteasome;Reference proteome;Repeat;Ubl conjugation	proteasome-mediated ubiquitin-dependent protein catabolic process [GO:0043161]	identical protein binding [GO:0042802]; molecular adaptor activity [GO:0060090]; polyubiquitin modification-dependent protein binding [GO:0031593]	cytoplasm [GO:0005737]; cytosol [GO:0005829]; nucleoplasm [GO:0005654]; nucleus [GO:0005634]; proteasome accessory complex [GO:0022624]; proteasome complex [GO:0000502]; proteasome regulatory particle, base subcomplex [GO:0008540]		1308.02	1484.12	1299.92	1267.24	1404.89	1354.37	1097.86	1218.4	1211.4	1127.92	1117.04	1046.94	proteasome complex&proteasome regulatory particle&proteasome accessory complex
O35955	Psmb10	PSB10_MOUSE	O35955	Proteasome subunit beta type-10 (EC 3.4.25.1) (Low molecular mass protein 10) (Macropain subunit MECl-1) (Multicatalytic endopeptidase complex subunit MECl-1) (Proteasome MECl-1) (Proteasome subunit beta-2i)	Psmb10 Lmp10 Mecl1	FUNCTION: The proteasome is a multicatalytic proteinase complex which is characterized by its ability to cleave peptides with Arg, Phe, Tyr, Leu, and Glu adjacent to the leaving group at neutral or slightly basic pH. The proteasome has an ATP-dependent proteolytic activity. This subunit is involved in antigen processing to generate class I binding peptides. Plays a role in determining the T-cell …	3D-structure;Acetylation;Cytoplasm;Hydrolase;Nucleus;Protease;Proteasome;Reference proteome;Threonine protease;Zymogen	cell morphogenesis [GO:0000902]; proteolysis involved in protein catabolic process [GO:0051603]; T cell proliferation [GO:0042098]	endopeptidase activity [GO:0004175]; threonine-type endopeptidase activity [GO:0004298]	cytosol [GO:0005829]; nucleoplasm [GO:0005654]; nucleus [GO:0005634]; proteasome core complex [GO:0005839]; proteasome core complex, beta-subunit complex [GO:0019774]; spermatoproteasome complex [GO:1990111]		1145.9	1004.57	936.268	826.232	854.055	832.115	880.118	817.794	809.51	887.312	803.543	756.013	proteasome complex
O55234	Psmb5	PSB5_MOUSE	O55234	Proteasome subunit beta type-5 (EC 3.4.25.1) (Macropain epsilon chain) (Multicatalytic endopeptidase complex epsilon chain) (Proteasome chain 6) (Proteasome epsilon chain) (Proteasome subunit X)	Psmb5	FUNCTION: Component of the 20S core proteasome complex involved in the proteolytic degradation of most intracellular proteins. This complex plays numerous essential roles within the cell by associating with different regulatory particles. Associated with two 19S regulatory particles, forms the 26S proteasome and thus participates in the ATP-dependent degradation of ubiquitinated proteins. The 26S…	3D-structure;Cytoplasm;Direct protein sequencing;Hydrolase;Nucleus;Protease;Proteasome;Reference proteome;Threonine protease;Zymogen	proteasome-mediated ubiquitin-dependent protein catabolic process [GO:0043161]; proteolysis [GO:0006508]; response to oxidative stress [GO:0006979]	endopeptidase activity [GO:0004175]; peptidase activity [GO:0008233]; threonine-type endopeptidase activity [GO:0004298]	centrosome [GO:0005813]; cytoplasm [GO:0005737]; cytosol [GO:0005829]; nucleoplasm [GO:0005654]; nucleus [GO:0005634]; proteasome complex [GO:0000502]; proteasome core complex [GO:0005839]; proteasome core complex, beta-subunit complex [GO:0019774]		412.494	361.105	305.237	362.219	293.912	343.552	337.433	305.292	342.535	251.77	316.718	392.396	proteasome complex
O70435	Psma3	PSA3_MOUSE	O70435	Proteasome subunit alpha type-3 (Macropain subunit C8) (Multicatalytic endopeptidase complex subunit C8) (Proteasome component C8) (Proteasome subunit K)	Psma3	FUNCTION: Component of the 20S core proteasome complex involved in the proteolytic degradation of most intracellular proteins. This complex plays numerous essential roles within the cell by associating with different regulatory particles. Associated with two 19S regulatory particles, forms the 26S proteasome and thus participates in the ATP-dependent degradation of ubiquitinated proteins. The 26S…	3D-structure;Acetylation;Cytoplasm;Direct protein sequencing;Nucleus;Phosphoprotein;Proteasome;Reference proteome	regulation of endopeptidase activity [GO:0052548]; ubiquitin-dependent protein catabolic process [GO:0006511]	ubiquitin protein ligase binding [GO:0031625]	cytoplasm [GO:0005737]; cytosol [GO:0005829]; nucleoplasm [GO:0005654]; nucleus [GO:0005634]; proteasome complex [GO:0000502]; proteasome core complex [GO:0005839]; proteasome core complex, alpha-subunit complex [GO:0019773]; synapse [GO:0045202]		2372.86	2309.38	2374.43	2043.77	2594.41	1797.16	2309.06	2053.45	2065.32	2265.98	2045.19	2194.86	proteasome complex
O70481	Ubr1	UBR1_MOUSE	O70481	E3 ubiquitin-protein ligase UBR1 (EC 2.3.2.27) (N-recognin-1) (RING-type E3 ubiquitin transferase UBR1) (Ubiquitin-protein ligase E3-alpha-1) (Ubiquitin-protein ligase E3-alpha-I)	Ubr1	FUNCTION: E3 ubiquitin-protein ligase which is a component of the N-end rule pathway. Recognizes and binds to proteins bearing specific N-terminal residues that are destabilizing according to the N-end rule, leading to their ubiquitination and subsequent degradation. May be involved in pancreatic homeostasis. Binds leucine and is a negative regulator of the leucine-mTOR signaling pathway, thereby…	Acetylation;Cytoplasm;Metal-binding;Phosphoprotein;Reference proteome;Transferase;Ubl conjugation pathway;Zinc;Zinc-finger	cellular response to leucine [GO:0071233]; negative regulation of TOR signaling [GO:0032007]; protein ubiquitination [GO:0016567]; ubiquitin-dependent protein catabolic process [GO:0006511]; ubiquitin-dependent protein catabolic process via the N-end rule pathway [GO:0071596]	leucine binding [GO:0070728]; ubiquitin protein ligase activity [GO:0061630]; ubiquitin-protein transferase activity [GO:0004842]; zinc ion binding [GO:0008270]	cytoplasm [GO:0005737]; cytosol [GO:0005829]; proteasome complex [GO:0000502]; ubiquitin ligase complex [GO:0000151]	PATHWAY: Protein modification; protein ubiquitination.	265.695	248.038	263.056	227.063	241.234	248.744	226.587	216.038	247.322	317.421	270.586	332.624	proteasome complex
O88843	Cradd	CRADD_MOUSE	O88843	Death domain-containing protein CRADD (Caspase and RIP adapter with death domain) (RIP-associated protein with a death domain)	Cradd Raidd	FUNCTION: Adapter protein that associates with PIDD1 and the caspase CASP2 to form the PIDDosome, a complex that activates CASP2 and triggers apoptosis. Also recruits CASP2 to the TNFR-1 signaling complex through its interaction with RIPK1 and TRADD and may play a role in the tumor necrosis factor-mediated signaling pathway. {ECO:0000250|UniProtKB:P78560}.	Apoptosis;Cytoplasm;Nucleus;Reference proteome	activation of cysteine-type endopeptidase activity involved in apoptotic process [GO:0006919]; apoptotic signaling pathway [GO:0097190]; cellular response to mechanical stimulus [GO:0071260]; DNA damage response [GO:0006974]; DNA damage response, signal transduction by p53 class mediator resulting in cell cycle arrest [GO:0006977]; positive regulation of apoptotic process [GO:0043065]; positive r…	death domain binding [GO:0070513]; protease binding [GO:0002020]; protein-macromolecule adaptor activity [GO:0030674]	cytoplasm [GO:0005737]; endopeptidase complex [GO:1905369]; nucleolus [GO:0005730]; nucleus [GO:0005634]		149.868	129.58	111.098	134.693	129.252	122.064	113.595	108.732	158.282	172.211	121.473	149.735	peptidase complex&endopeptidase complex
P01027	C3	CO3_MOUSE	P01027	Complement C3 (HSE-MSF) [Cleaved into: Complement C3 beta chain; C3-beta-c (C3bc); Complement C3 alpha chain; C3a anaphylatoxin; Acylation stimulating protein (ASP) (C3adesArg); Complement C3b alpha' chain; Complement C3c alpha' chain fragment 1; Complement C3dg fragment; Complement C3g fragment; Complement C3d fragment; Complement C3f fragment; Complement C3c alpha' chain fragment 2]	C3	FUNCTION: C3 plays a central role in the activation of the complement system. Its processing by C3 convertase is the central reaction in both classical and alternative complement pathways. After activation C3b can bind covalently, via its reactive thioester, to cell surface carbohydrates or immune aggregates.; FUNCTION: Derived from proteolytic degradation of complement C3, C3a anaphylatoxin is a…	3D-structure;Alternative initiation;Cleavage on pair of basic residues;Complement alternate pathway;Complement pathway;Direct protein sequencing;Disulfide bond;Fatty acid metabolism;Glycoprotein;Immunity;Inflammatory response;Innate immunity;Lipid metabolism;Phosphoprotein;Reference proteome;Secreted;Signal;Thioester bond	amyloid-beta clearance [GO:0097242]; blood coagulation [GO:0007596]; cell surface receptor signaling pathway involved in cell-cell signaling [GO:1905114]; complement activation [GO:0006956]; complement activation, alternative pathway [GO:0006957]; complement activation, classical pathway [GO:0006958]; complement-dependent cytotoxicity [GO:0097278]; complement-mediated synapse pruning [GO:0150062]…	C5L2 anaphylatoxin chemotactic receptor binding [GO:0031715]; endopeptidase inhibitor activity [GO:0004866]; lipid binding [GO:0008289]	cell surface [GO:0009986]; extracellular region [GO:0005576]; extracellular space [GO:0005615]; plasma membrane [GO:0005886]; protein-containing complex [GO:0032991]; serine-type endopeptidase complex [GO:1905370]		256.365	214.81	252.823	159.606	181.097	223.815	157.964	125.911	157.169	179.112	212.745	208.483	peptidase complex&endopeptidase complex
P14685	Psmd3	PSMD3_MOUSE	P14685	26S proteasome non-ATPase regulatory subunit 3 (26S proteasome regulatory subunit RPN3) (26S proteasome regulatory subunit S3) (Proteasome subunit p58) (Transplantation antigen P91A) (Tum-P91A antigen)	Psmd3 P91a Tstap91a	FUNCTION: Component of the 26S proteasome, a multiprotein complex involved in the ATP-dependent degradation of ubiquitinated proteins. This complex plays a key role in the maintenance of protein homeostasis by removing misfolded or damaged proteins, which could impair cellular functions, and by removing proteins whose functions are no longer required. Therefore, the proteasome participates in num…	Isopeptide bond;Phosphoprotein;Proteasome;Reference proteome;Tumor antigen;Ubl conjugation	regulation of protein catabolic process [GO:0042176]; ubiquitin-dependent protein catabolic process [GO:0006511]	enzyme regulator activity [GO:0030234]	proteasome accessory complex [GO:0022624]; proteasome complex [GO:0000502]; proteasome regulatory particle [GO:0005838]; proteasome regulatory particle, lid subcomplex [GO:0008541]		3062.52	3086.41	3423.16	3671.29	3251	3397.41	3058.28	3015.93	2798.86	2770.51	2772.38	2882.83	proteasome complex&proteasome regulatory particle&proteasome accessory complex
P26516	Psmd7	PSMD7_MOUSE	P26516	26S proteasome non-ATPase regulatory subunit 7 (26S proteasome regulatory subunit RPN8) (26S proteasome regulatory subunit S12) (Mov34 protein) (Proteasome subunit p40)	Psmd7 Mov-34 Mov34	FUNCTION: Component of the 26S proteasome, a multiprotein complex involved in the ATP-dependent degradation of ubiquitinated proteins. This complex plays a key role in the maintenance of protein homeostasis by removing misfolded or damaged proteins, which could impair cellular functions, and by removing proteins whose functions are no longer required. Therefore, the proteasome participates in num…	Acetylation;Direct protein sequencing;Isopeptide bond;Proteasome;Reference proteome;Ubl conjugation	proteasome-mediated ubiquitin-dependent protein catabolic process [GO:0043161]	metallopeptidase activity [GO:0008237]; protein homodimerization activity [GO:0042803]	nucleoplasm [GO:0005654]; proteasome complex [GO:0000502]; proteasome regulatory particle [GO:0005838]		6215.19	5899.73	6498.85	5661.29	7467.61	6572.78	6668.4	6357.05	5912.29	6178.81	6706.03	6322.19	proteasome complex&proteasome regulatory particle
P28076	Psmb9	PSB9_MOUSE	P28076	Proteasome subunit beta type-9 (EC 3.4.25.1) (LMP-2d) (Low molecular mass protein 2) (Macropain chain 7) (Multicatalytic endopeptidase complex chain 7) (Proteasome chain 7) (Proteasome subunit beta-1i) (Really interesting new gene 12 protein)	Psmb9 Lmp2 Ring12	FUNCTION: The proteasome is a multicatalytic proteinase complex which is characterized by its ability to cleave peptides with Arg, Phe, Tyr, Leu, and Glu adjacent to the leaving group at neutral or slightly basic pH. The proteasome has an ATP-dependent proteolytic activity. This subunit is involved in antigen processing to generate class I binding peptides. Contributes to NFKBIA degradation and s…	3D-structure;Acetylation;Cytoplasm;Hydrolase;Immunity;Nucleus;Protease;Proteasome;Reference proteome;Threonine protease;Zymogen	antigen processing and presentation [GO:0019882]; proteolysis involved in protein catabolic process [GO:0051603]; regulation of cysteine-type endopeptidase activity [GO:2000116]; response to bacterium [GO:0009617]	endopeptidase activity [GO:0004175]; proteasome binding [GO:0070628]; threonine-type endopeptidase activity [GO:0004298]	cytosol [GO:0005829]; nucleoplasm [GO:0005654]; proteasome complex [GO:0000502]; proteasome core complex [GO:0005839]; proteasome core complex, beta-subunit complex [GO:0019774]; spermatoproteasome complex [GO:1990111]		713.712	616.147	734.989	534.255	627.912	497.961	431.043	403.004	387.983	548.117	659.689	523.581	Antigen processing
P29594	Casp2	CASP2_MOUSE	P29594	Caspase-2 (CASP-2) (EC 3.4.22.55) (Neural precursor cell expressed developmentally down-regulated protein 2) (NEDD-2) (Protease ICH-1) [Cleaved into: Caspase-2 subunit p18; Caspase-2 subunit p13; Caspase-2 subunit p12]	Casp2 Ich1 Nedd-2 Nedd2	FUNCTION: Involved in the activation cascade of caspases responsible for apoptosis execution. Might function by either activating some proteins required for cell death or inactivating proteins necessary for cell survival (PubMed:7958843). Associates with PIDD1 and CRADD to form the PIDDosome, a complex that activates CASP2 and triggers apoptosis in response to genotoxic stress (By similarity). {E…	Acetylation;Apoptosis;Hydrolase;Phosphoprotein;Protease;Reference proteome;Thiol protease;Zymogen	activation of cysteine-type endopeptidase activity involved in apoptotic process [GO:0006919]; aging [GO:0007568]; apoptotic process [GO:0006915]; apoptotic signaling pathway [GO:0097190]; brain development [GO:0007420]; cellular response to mechanical stimulus [GO:0071260]; DNA damage response [GO:0006974]; DNA damage response, signal transduction by p53 class mediator resulting in cell cycle ar…	cysteine-type endopeptidase activity [GO:0004197]; cysteine-type endopeptidase activity involved in apoptotic process [GO:0097153]; cysteine-type endopeptidase activity involved in apoptotic signaling pathway [GO:0097199]; cysteine-type endopeptidase activity involved in execution phase of apoptosis [GO:0097200]; identical protein binding [GO:0042802]; protein domain specific binding [GO:0019904]	caspase complex [GO:0008303]; cytoplasm [GO:0005737]; endopeptidase complex [GO:1905369]; membrane [GO:0016020]; mitochondrion [GO:0005739]; nucleolus [GO:0005730]; nucleus [GO:0005634]		262.293	217.221	212.091	194.948	217.701	205.495	233.997	227.822	235.387	291.228	303.522	297.849	peptidase complex&endopeptidase complex
Q8BVQ9	Psmc2	PRS7_MOUSE;Q8BVQ9_MOUSE	Q8BVQ9	26S proteasome regulatory subunit 7 (Proteasome (prosome, macropain) 26S subunit, ATPase 2)	Psmc2		ATP-binding;Coiled coil;Nucleotide-binding;Phosphoprotein;Proteasome;Proteomics identification;Reference proteome	ubiquitin-dependent protein catabolic process [GO:0006511]	ATP binding [GO:0005524]; ATP hydrolysis activity [GO:0016887]; proteasome-activating activity [GO:0036402]	cytoplasmic ribonucleoprotein granule [GO:0036464]; cytosol [GO:0005829]; proteasome complex [GO:0000502]		2261.88	2464.19	2325.92	2280.68	2256.8	2170.19	2419.73	2347.22	2415.07	2341.96	2377.57	2425.19	proteasome complex
P49722	Psma2	PSA2_MOUSE	P49722	Proteasome subunit alpha type-2 (Macropain subunit C3) (Multicatalytic endopeptidase complex subunit C3) (Proteasome component C3)	Psma2 Lmpc3	FUNCTION: Component of the 20S core proteasome complex involved in the proteolytic degradation of most intracellular proteins. This complex plays numerous essential roles within the cell by associating with different regulatory particles. Associated with two 19S regulatory particles, forms the 26S proteasome and thus participates in the ATP-dependent degradation of ubiquitinated proteins. The 26S…	3D-structure;Acetylation;Cytoplasm;Direct protein sequencing;Nucleus;Phosphoprotein;Proteasome;Reference proteome	response to virus [GO:0009615]; ubiquitin-dependent protein catabolic process [GO:0006511]		cytoplasm [GO:0005737]; cytosol [GO:0005829]; nucleoplasm [GO:0005654]; nucleus [GO:0005634]; P-body [GO:0000932]; proteasome complex [GO:0000502]; proteasome core complex [GO:0005839]; proteasome core complex, alpha-subunit complex [GO:0019773]		4985.2	5310.93	4906.45	5450.86	5151.87	5596.84	5414.95	5218.22	5036.2	5197.94	4974.5	4768.54	proteasome complex
Q8CAP3	Rad23a	RD23A_MOUSE;Q8CAP3_MOUSE	Q8CAP3	UV excision repair protein RAD23	Rad23a	FUNCTION: Multiubiquitin chain receptor involved in modulation of proteasomal degradation. Involved in nucleotide excision repair. {ECO:0000256|RuleBase:RU367049}.	Cytoplasm;DNA damage;DNA repair;Nucleus;Proteasome;Proteomics identification;Reference proteome;Repeat	nucleotide-excision repair [GO:0006289]; proteasome-mediated ubiquitin-dependent protein catabolic process [GO:0043161]	damaged DNA binding [GO:0003684]; polyubiquitin modification-dependent protein binding [GO:0031593]; ubiquitin binding [GO:0043130]	cytosol [GO:0005829]; nucleoplasm [GO:0005654]; proteasome complex [GO:0000502]		398.868	479.033	458.751	401.289	521.886	373.444	516.373	518.957	455.864	484.007	481.316	414.354	proteasome complex
P54728	Rad23b	RD23B_MOUSE	P54728	UV excision repair protein RAD23 homolog B (HR23B) (mHR23B) (XP-C repair-complementing complex 58 kDa protein) (p58)	Rad23b Mhr23b	FUNCTION: Multiubiquitin chain receptor involved in modulation of proteasomal degradation. Binds to polyubiquitin chains. Proposed to be capable to bind simultaneously to the 26S proteasome and to polyubiquitinated substrates and to deliver ubiquitinated proteins to the proteasome. May play a role in endoplasmic reticulum-associated degradation (ERAD) of misfolded glycoproteins by association wit…	3D-structure;Cytoplasm;DNA damage;DNA repair;Nucleus;Phosphoprotein;Proteasome;Reference proteome;Repeat;Ubl conjugation pathway	cellular response to interleukin-7 [GO:0098761]; DNA damage response [GO:0006974]; embryonic organ development [GO:0048568]; nucleotide-excision repair [GO:0006289]; proteasome-mediated ubiquitin-dependent protein catabolic process [GO:0043161]; regulation of proteasomal ubiquitin-dependent protein catabolic process [GO:0032434]; spermatogenesis [GO:0007283]	damaged DNA binding [GO:0003684]; DNA damage sensor activity [GO:0140612]; polyubiquitin modification-dependent protein binding [GO:0031593]; proteasome binding [GO:0070628]; RNA polymerase II cis-regulatory region sequence-specific DNA binding [GO:0000978]; RNA polymerase II-specific DNA-binding transcription factor binding [GO:0061629]; transcription cis-regulatory region binding [GO:0000976]; …	cytoplasm [GO:0005737]; cytosol [GO:0005829]; nucleoplasm [GO:0005654]; nucleus [GO:0005634]; proteasome complex [GO:0000502]; XPC complex [GO:0071942]		2468.88	3017.04	3051.65	2347.58	3089.65	2140.4	2836.32	2389.08	2505.25	2114.71	1982.14	2332.72	proteasome complex
P54775	Psmc4	PRS6B_MOUSE	P54775	26S proteasome regulatory subunit 6B (26S proteasome AAA-ATPase subunit RPT3) (CIP21) (MB67-interacting protein) (MIP224) (Proteasome 26S subunit ATPase 4) (Tat-binding protein 7) (TBP-7)	Psmc4 Tbp7	FUNCTION: Component of the 26S proteasome, a multiprotein complex involved in the ATP-dependent degradation of ubiquitinated proteins. This complex plays a key role in the maintenance of protein homeostasis by removing misfolded or damaged proteins, which could impair cellular functions, and by removing proteins whose functions are no longer required. Therefore, the proteasome participates in num…	3D-structure;Acetylation;ATP-binding;Cytoplasm;Direct protein sequencing;Nucleotide-binding;Nucleus;Phosphoprotein;Proteasome;Reference proteome	blastocyst development [GO:0001824]; proteasome-mediated ubiquitin-dependent protein catabolic process [GO:0043161]	ATP binding [GO:0005524]; ATP hydrolysis activity [GO:0016887]; proteasome-activating activity [GO:0036402]	cytosol [GO:0005829]; cytosolic proteasome complex [GO:0031597]; inclusion body [GO:0016234]; nucleoplasm [GO:0005654]; proteasome accessory complex [GO:0022624]; proteasome complex [GO:0000502]; proteasome regulatory particle, base subcomplex [GO:0008540]; synapse [GO:0045202]		3149.44	3079.08	2956.78	2783.09	3090.87	3053.12	3095.77	3014.39	3219.33	2907.9	2770.19	3008.93	proteasome complex&proteasome regulatory particle&proteasome accessory complex
P62192	Psmc1	PRS4_MOUSE	P62192	26S proteasome regulatory subunit 4 (P26s4) (26S proteasome AAA-ATPase subunit RPT2) (Proteasome 26S subunit ATPase 1)	Psmc1	FUNCTION: Component of the 26S proteasome, a multiprotein complex involved in the ATP-dependent degradation of ubiquitinated proteins. This complex plays a key role in the maintenance of protein homeostasis by removing misfolded or damaged proteins, which could impair cellular functions, and by removing proteins whose functions are no longer required. Therefore, the proteasome participates in num…	Acetylation;ATP-binding;Cytoplasm;Isopeptide bond;Lipoprotein;Membrane;Myristate;Nucleotide-binding;Nucleus;Phosphoprotein;Proteasome;Reference proteome;Ubl conjugation	negative regulation of neuron death [GO:1901215]; proteasome-mediated ubiquitin-dependent protein catabolic process [GO:0043161]	ATP binding [GO:0005524]; ATP hydrolysis activity [GO:0016887]; proteasome-activating activity [GO:0036402]; TBP-class protein binding [GO:0017025]	cytosol [GO:0005829]; membrane [GO:0016020]; nucleoplasm [GO:0005654]; nucleus [GO:0005634]; proteasome accessory complex [GO:0022624]; proteasome complex [GO:0000502]; proteasome regulatory particle [GO:0005838]; proteasome regulatory particle, base subcomplex [GO:0008540]		3523.55	3920.71	3952.24	4023.4	4309.38	4095.73	4276.67	3870.96	3855.8	3341.87	3328.96	3339.13	proteasome complex&proteasome regulatory particle&proteasome accessory complex
P62196	Psmc5	PRS8_MOUSE	P62196	26S proteasome regulatory subunit 8 (26S proteasome AAA-ATPase subunit RPT6) (Proteasome 26S subunit ATPase 5) (Proteasome subunit p45) (p45/SUG) (mSUG1)	Psmc5 Sug1	FUNCTION: Component of the 26S proteasome, a multiprotein complex involved in the ATP-dependent degradation of ubiquitinated proteins. This complex plays a key role in the maintenance of protein homeostasis by removing misfolded or damaged proteins, which could impair cellular functions, and by removing proteins whose functions are no longer required. Therefore, the proteasome participates in num…	Acetylation;ATP-binding;Cytoplasm;Nucleotide-binding;Nucleus;Phosphoprotein;Proteasome;Reference proteome	modulation of chemical synaptic transmission [GO:0050804]; negative regulation of DNA-templated transcription [GO:0045892]; positive regulation of inclusion body assembly [GO:0090261]; proteasome-mediated ubiquitin-dependent protein catabolic process [GO:0043161]; regulation of transcription by RNA polymerase II [GO:0006357]	ATP binding [GO:0005524]; ATP hydrolysis activity [GO:0016887]; DNA-binding transcription factor binding [GO:0140297]; general transcription initiation factor binding [GO:0140296]; proteasome-activating activity [GO:0036402]; signaling receptor binding [GO:0005102]; TBP-class protein binding [GO:0017025]; thyrotropin-releasing hormone receptor binding [GO:0031531]	cytoplasm [GO:0005737]; cytoplasmic vesicle [GO:0031410]; cytosolic proteasome complex [GO:0031597]; inclusion body [GO:0016234]; nuclear proteasome complex [GO:0031595]; nucleus [GO:0005634]; postsynapse [GO:0098794]; proteasome accessory complex [GO:0022624]; proteasome complex [GO:0000502]; proteasome regulatory particle [GO:0005838]; proteasome regulatory particle, base subcomplex [GO:0008540…		4095.12	3926.38	3978.23	4117.53	4436.93	4297.25	4543.63	4217.72	4121.15	3823.75	4173.07	3809.98	proteasome complex&proteasome regulatory particle&proteasome accessory complex
P62334	Psmc6	PRS10_MOUSE	P62334	26S proteasome regulatory subunit 10B (26S proteasome AAA-ATPase subunit RPT4) (Proteasome 26S subunit ATPase 6) (Proteasome subunit p42)	Psmc6 Sug2	FUNCTION: Component of the 26S proteasome, a multiprotein complex involved in the ATP-dependent degradation of ubiquitinated proteins. This complex plays a key role in the maintenance of protein homeostasis by removing misfolded or damaged proteins, which could impair cellular functions, and by removing proteins whose functions are no longer required. Therefore, the proteasome participates in num…	Acetylation;ATP-binding;Cytoplasm;Direct protein sequencing;Nucleotide-binding;Nucleus;Phosphoprotein;Proteasome;Reference proteome	positive regulation of inclusion body assembly [GO:0090261]; positive regulation of RNA polymerase II transcription preinitiation complex assembly [GO:0045899]; ubiquitin-dependent ERAD pathway [GO:0030433]	ATP binding [GO:0005524]; ATP hydrolysis activity [GO:0016887]; identical protein binding [GO:0042802]; proteasome-activating activity [GO:0036402]	cytosolic proteasome complex [GO:0031597]; inclusion body [GO:0016234]; nucleus [GO:0005634]; proteasome accessory complex [GO:0022624]; proteasome complex [GO:0000502]; proteasome regulatory particle, base subcomplex [GO:0008540]		3870.36	3944.84	3764.13	3854.13	3950.59	4085.67	4157.25	4038.72	4247.8	3814.18	3618.64	3677.33	proteasome complex&proteasome regulatory particle&proteasome accessory complex
P70195	Psmb7	PSB7_MOUSE	P70195	Proteasome subunit beta type-7 (EC 3.4.25.1) (Macropain chain Z) (Multicatalytic endopeptidase complex chain Z) (Proteasome subunit Z)	Psmb7 Mmc14	FUNCTION: Component of the 20S core proteasome complex involved in the proteolytic degradation of most intracellular proteins. This complex plays numerous essential roles within the cell by associating with different regulatory particles. Associated with two 19S regulatory particles, forms the 26S proteasome and thus participates in the ATP-dependent degradation of ubiquitinated proteins. The 26S…	3D-structure;Cytoplasm;Direct protein sequencing;Hydrolase;Nucleus;Protease;Proteasome;Reference proteome;Threonine protease;Zymogen	proteolysis involved in protein catabolic process [GO:0051603]	endopeptidase activity [GO:0004175]; threonine-type endopeptidase activity [GO:0004298]	cytoplasm [GO:0005737]; cytosol [GO:0005829]; nuclear body [GO:0016604]; nucleoplasm [GO:0005654]; nucleus [GO:0005634]; proteasome complex [GO:0000502]; proteasome core complex [GO:0005839]; proteasome core complex, beta-subunit complex [GO:0019774]		1753.92	1988.8	1830.33	1692.06	1845.94	1984.98	2039.08	1777.12	1845.24	1817.82	1787.31	1950.45	proteasome complex
P99026	Psmb4	PSB4_MOUSE	P99026	Proteasome subunit beta type-4 (Low molecular mass protein 3) (Macropain beta chain) (Multicatalytic endopeptidase complex beta chain) (Proteasome beta chain) (Proteasome chain 3)	Psmb4 Lmp3	FUNCTION: Non-catalytic component of the 20S core proteasome complex involved in the proteolytic degradation of most intracellular proteins. This complex plays numerous essential roles within the cell by associating with different regulatory particles. Associated with two 19S regulatory particles, forms the 26S proteasome and thus participates in the ATP-dependent degradation of ubiquitinated pro…	3D-structure;Acetylation;Cytoplasm;Direct protein sequencing;Nucleus;Phosphoprotein;Proteasome;Reference proteome	negative regulation of inflammatory response to antigenic stimulus [GO:0002862]; proteolysis involved in protein catabolic process [GO:0051603]	lipopolysaccharide binding [GO:0001530]	ciliary basal body [GO:0036064]; cytoplasm [GO:0005737]; cytosol [GO:0005829]; mitochondrion [GO:0005739]; nucleoplasm [GO:0005654]; nucleus [GO:0005634]; proteasome complex [GO:0000502]; proteasome core complex [GO:0005839]; proteasome core complex, beta-subunit complex [GO:0019774]		565.05	523.326	564.351	539.344	496.592	562.581	563.873	564.758	593.022	621.411	621.555	489.913	proteasome complex
Q01853	Vcp	TERA_MOUSE	Q01853	Transitional endoplasmic reticulum ATPase (TER ATPase) (EC 3.6.4.6) (15S Mg(2+)-ATPase p97 subunit) (Valosin-containing protein) (VCP)	Vcp	FUNCTION: Necessary for the fragmentation of Golgi stacks during mitosis and for their reassembly after mitosis. Involved in the formation of the transitional endoplasmic reticulum (tER). The transfer of membranes from the endoplasmic reticulum to the Golgi apparatus occurs via 50-70 nm transition vesicles which derive from part-rough, part-smooth transitional elements of the endoplasmic reticulu…	3D-structure;Acetylation;ATP-binding;Autophagy;Cytoplasm;Direct protein sequencing;DNA damage;DNA repair;Endoplasmic reticulum;Hydrolase;Isopeptide bond;Lipid-binding;Methylation;Nucleotide-binding;Nucleus;Phosphoprotein;Reference proteome;Transport;Ubl conjugation;Ubl conjugation pathway	activation of cysteine-type endopeptidase activity involved in apoptotic process [GO:0006919]; aggresome assembly [GO:0070842]; ATP metabolic process [GO:0046034]; autophagosome maturation [GO:0097352]; autophagy [GO:0006914]; cellular response to arsenite ion [GO:1903843]; cellular response to heat [GO:0034605]; DNA damage response [GO:0006974]; DNA repair [GO:0006281]; double-strand break repai…	ADP binding [GO:0043531]; ATP binding [GO:0005524]; ATP hydrolysis activity [GO:0016887]; BAT3 complex binding [GO:1904288]; deubiquitinase activator activity [GO:0035800]; identical protein binding [GO:0042802]; K48-linked polyubiquitin modification-dependent protein binding [GO:0036435]; lipid binding [GO:0008289]; MHC class I protein binding [GO:0042288]; polyubiquitin modification-dependent p…	ATPase complex [GO:1904949]; cytoplasm [GO:0005737]; cytoplasmic stress granule [GO:0010494]; cytosol [GO:0005829]; Derlin-1 retrotranslocation complex [GO:0036513]; endoplasmic reticulum [GO:0005783]; endoplasmic reticulum membrane [GO:0005789]; glutamatergic synapse [GO:0098978]; intracellular membrane-bounded organelle [GO:0043231]; lipid droplet [GO:0005811]; myelin sheath [GO:0043209]; nucle…		9114.99	8904.76	8862.95	9123.26	9130.91	8808.71	9586.52	8786.72	8968.42	8562.29	8369.63	8350.88	proteasome complex
Q3TXS7	Psmd1	PSMD1_MOUSE	Q3TXS7	26S proteasome non-ATPase regulatory subunit 1 (26S proteasome regulatory subunit RPN2) (26S proteasome regulatory subunit S1)	Psmd1	FUNCTION: Component of the 26S proteasome, a multiprotein complex involved in the ATP-dependent degradation of ubiquitinated proteins. This complex plays a key role in the maintenance of protein homeostasis by removing misfolded or damaged proteins, which could impair cellular functions, and by removing proteins whose functions are no longer required. Therefore, the proteasome participates in num…	Acetylation;Phosphoprotein;Proteasome;Reference proteome;Repeat	proteasome-mediated ubiquitin-dependent protein catabolic process [GO:0043161]; regulation of protein catabolic process [GO:0042176]	enzyme regulator activity [GO:0030234]; ubiquitin protein ligase binding [GO:0031625]	nucleus [GO:0005634]; proteasome accessory complex [GO:0022624]; proteasome complex [GO:0000502]; proteasome regulatory particle, base subcomplex [GO:0008540]; proteasome storage granule [GO:0034515]		5273.11	5260.88	5242.72	5497.96	5380.05	5056.13	5156.41	4951.93	4873.73	4554.97	4482.45	4684.16	proteasome complex&proteasome regulatory particle&proteasome accessory complex
Q5SSW2	Psme4	PSME4_MOUSE	Q5SSW2	Proteasome activator complex subunit 4 (Proteasome activator PA200) (Protein TEMO)	Psme4 Kiaa0077	FUNCTION: Associated component of the proteasome that specifically recognizes acetylated histones and promotes ATP- and ubiquitin-independent degradation of core histones during spermatogenesis and DNA damage response. Recognizes and binds acetylated histones via its bromodomain-like (BRDL) region and activates the proteasome by opening the gated channel for substrate entry. Binds to the core pro…	Alternative splicing;Cytoplasm;Developmental protein;Differentiation;DNA damage;DNA repair;Nucleus;Phosphoprotein;Proteasome;Reference proteome;Repeat;Spermatogenesis	DNA damage response [GO:0006974]; DNA repair [GO:0006281]; proteasomal ubiquitin-independent protein catabolic process [GO:0010499]; sperm DNA condensation [GO:0035092]	lysine-acetylated histone binding [GO:0070577]; peptidase activator activity [GO:0016504]; proteasome binding [GO:0070628]	cytosol [GO:0005829]; nuclear speck [GO:0016607]; nucleoplasm [GO:0005654]; nucleus [GO:0005634]; spermatoproteasome complex [GO:1990111]		941.195	878.838	805.593	893.199	948.7	919.843	946.592	900.978	951.754	1074.5	1120.1	1033.17	proteasome complex
Q60692	Psmb6	PSB6_MOUSE	Q60692	Proteasome subunit beta type-6 (EC 3.4.25.1) (Low molecular mass protein 19) (Macropain delta chain) (Multicatalytic endopeptidase complex delta chain) (Proteasome delta chain) (Proteasome subunit Y)	Psmb6 Lmp19	FUNCTION: Component of the 20S core proteasome complex involved in the proteolytic degradation of most intracellular proteins. This complex plays numerous essential roles within the cell by associating with different regulatory particles. Associated with two 19S regulatory particles, forms the 26S proteasome and thus participates in the ATP-dependent degradation of ubiquitinated proteins. The 26S…	3D-structure;Acetylation;Cytoplasm;Direct protein sequencing;Hydrolase;Nucleus;Phosphoprotein;Protease;Proteasome;Reference proteome;Threonine protease;Zymogen	proteolysis involved in protein catabolic process [GO:0051603]	endopeptidase activity [GO:0004175]; threonine-type endopeptidase activity [GO:0004298]	cytoplasm [GO:0005737]; cytosol [GO:0005829]; mitochondrion [GO:0005739]; nucleoplasm [GO:0005654]; nucleus [GO:0005634]; proteasome complex [GO:0000502]; proteasome core complex [GO:0005839]; proteasome core complex, beta-subunit complex [GO:0019774]		1530.09	1517.04	1365.06	1354.69	958.877	1433.47	1403.75	1492.33	1223.59	1306.73	1302.19	929.727	proteasome complex
Q6PDI5	Ecpas	ECM29_MOUSE	Q6PDI5	Proteasome adapter and scaffold protein ECM29 (Proteasome-associated protein ECM29 homolog)	Ecpas Ecm29 Kiaa0368	FUNCTION: Adapter/scaffolding protein that binds to the 26S proteasome, motor proteins and other compartment specific proteins. May couple the proteasome to different compartments including endosome, endoplasmic reticulum and centrosome. May play a role in ERAD and other enhanced proteolysis (By similarity). Promotes proteasome dissociation under oxidative stress (PubMed:26802743). {ECO:0000250|U…	Alternative splicing;Cytoplasm;Cytoplasmic vesicle;Cytoskeleton;Endoplasmic reticulum;Endosome;Isopeptide bond;Nucleus;Phosphoprotein;Proteasome;Reference proteome;Repeat;Ubl conjugation	proteasome assembly [GO:0043248]; ubiquitin-dependent ERAD pathway [GO:0030433]	molecular adaptor activity [GO:0060090]; proteasome binding [GO:0070628]	centrosome [GO:0005813]; COPII-coated ER to Golgi transport vesicle [GO:0030134]; cytoplasm [GO:0005737]; cytoplasmic vesicle [GO:0031410]; early endosome [GO:0005769]; endocytic vesicle [GO:0030139]; endoplasmic reticulum [GO:0005783]; endoplasmic reticulum-Golgi intermediate compartment [GO:0005793]; late endosome [GO:0005770]; multivesicular body [GO:0005771]; nucleoplasm [GO:0005654]; nucleus…		2539.59	2551.04	2462.76	2340.61	2365.03	2374.49	2500.82	2452.59	2406.29	2599.49	2633.79	2545.84	proteasome complex
Q6ZWQ7	Spcs3	SPCS3_MOUSE	Q6ZWQ7	Signal peptidase complex subunit 3 (Microsomal signal peptidase 22/23 kDa subunit) (SPC22/23) (SPase 22/23 kDa subunit)	Spcs3	FUNCTION: Essential component of the signal peptidase complex (SPC) which catalyzes the cleavage of N-terminal signal sequences from nascent proteins as they are translocated into the lumen of the endoplasmic reticulum (By similarity). Essential for the SPC catalytic activity, possibly by stabilizing and positioning the active center of the complex close to the lumenal surface (By similarity). {E…	Endoplasmic reticulum;Glycoprotein;Membrane;Reference proteome;Signal-anchor;Transmembrane;Transmembrane helix	protein targeting to ER [GO:0045047]; proteolysis [GO:0006508]; signal peptide processing [GO:0006465]; viral protein processing [GO:0019082]		endoplasmic reticulum [GO:0005783]; signal peptidase complex [GO:0005787]		367.434	297.31	199.7	299.592	332.053	263.301	300.602	327.501	295.332	264.739	377.131	NaN	peptidase complex
Q8BG32	Psmd11	PSD11_MOUSE	Q8BG32	26S proteasome non-ATPase regulatory subunit 11 (26S proteasome regulatory subunit RPN6) (26S proteasome regulatory subunit S9) (26S proteasome regulatory subunit p44.5)	Psmd11	FUNCTION: Component of the 26S proteasome, a multiprotein complex involved in the ATP-dependent degradation of ubiquitinated proteins. This complex plays a key role in the maintenance of protein homeostasis by removing misfolded or damaged proteins, which could impair cellular functions, and by removing proteins whose functions are no longer required. Therefore, the proteasome participates in num…	Acetylation;Direct protein sequencing;Isopeptide bond;Phosphoprotein;Proteasome;Reference proteome;Ubl conjugation	proteasome assembly [GO:0043248]; stem cell differentiation [GO:0048863]; ubiquitin-dependent protein catabolic process [GO:0006511]	structural molecule activity [GO:0005198]	proteasome accessory complex [GO:0022624]; proteasome complex [GO:0000502]; proteasome regulatory particle [GO:0005838]; proteasome regulatory particle, lid subcomplex [GO:0008541]		3328.83	3272.32	3340.38	3018.08	3265.59	3263.46	3202.54	3046.89	2871.64	3024	3003.69	2996.91	proteasome complex&proteasome regulatory particle&proteasome accessory complex
Q8BHL8	Psmf1	PSMF1_MOUSE	Q8BHL8	Proteasome inhibitor PI31 subunit	Psmf1	FUNCTION: Plays an important role in control of proteasome function. Inhibits the hydrolysis of protein and peptide substrates by the 20S proteasome. Also inhibits the activation of the proteasome by the proteasome regulatory proteins PA700 and PA28 (By similarity). {ECO:0000250}.	Acetylation;Cytoplasm;Endoplasmic reticulum;Methylation;Phosphoprotein;Proteasome;Reference proteome	negative regulation of proteasomal protein catabolic process [GO:1901799]; proteasome-mediated ubiquitin-dependent protein catabolic process [GO:0043161]; ubiquitin-dependent protein catabolic process [GO:0006511]	endopeptidase inhibitor activity [GO:0004866]; proteasome binding [GO:0070628]; protein heterodimerization activity [GO:0046982]; protein homodimerization activity [GO:0042803]	cytosol [GO:0005829]; endoplasmic reticulum [GO:0005783]; perinuclear region of cytoplasm [GO:0048471]; proteasome complex [GO:0000502]		646.773	577.416	713.126	651.227	537.411	497.063	591.765	610.142	526.925	614.113	565.692	536.025	proteasome complex
Q8BJY1	Psmd5	PSMD5_MOUSE	Q8BJY1	26S proteasome non-ATPase regulatory subunit 5 (26S protease subunit S5 basic) (26S proteasome subunit S5B)	Psmd5 Kiaa0072	FUNCTION: Acts as a chaperone during the assembly of the 26S proteasome, specifically of the base subcomplex of the PA700/19S regulatory complex (RC). In the initial step of the base subcomplex assembly is part of an intermediate PSMD5:PSMC2:PSMC1:PSMD2 module which probably assembles with a PSMD10:PSMC4:PSMC5:PAAF1 module followed by dissociation of PSMD5 (By similarity). {ECO:0000250}.	Acetylation;Chaperone;Reference proteome	proteasome regulatory particle assembly [GO:0070682]		proteasome accessory complex [GO:0022624]; proteasome regulatory particle, base subcomplex [GO:0008540]		1094.81	1085.81	1004.23	1118.04	1033.13	1050.33	1071.01	1086.16	1083.56	1057.09	1020.09	1013.55	proteasome complex&proteasome regulatory particle&proteasome accessory complex
Q8R317	Ubqln1	UBQL1_MOUSE	Q8R317	Ubiquilin-1 (Protein linking IAP with cytoskeleton 1) (PLIC-1)	Ubqln1 Plic1	FUNCTION: Plays an important role in the regulation of different protein degradation mechanisms and pathways including ubiquitin-proteasome system (UPS), autophagy and endoplasmic reticulum-associated protein degradation (ERAD) pathway. Mediates the proteasomal targeting of misfolded or accumulated proteins for degradation by binding (via UBA domain) to their polyubiquitin chains and by interacti…	Acetylation;Alternative splicing;Autophagy;Cell membrane;Cytoplasm;Cytoplasmic vesicle;Direct protein sequencing;Endoplasmic reticulum;Membrane;Nucleus;Proteasome;Reference proteome;Ubl conjugation	aggrephagy [GO:0035973]; autophagosome assembly [GO:0000045]; autophagosome maturation [GO:0097352]; cellular response to hypoxia [GO:0071456]; macroautophagy [GO:0016236]; negative regulation of store-operated calcium channel activity [GO:1901340]; negative regulation of toll-like receptor 3 signaling pathway [GO:0034140]; positive regulation of ER-associated ubiquitin-dependent protein cataboli…	identical protein binding [GO:0042802]; intermediate filament binding [GO:0019215]; kinase binding [GO:0019900]; polyubiquitin modification-dependent protein binding [GO:0031593]; protein domain specific binding [GO:0019904]; signaling receptor binding [GO:0005102]	aggresome [GO:0016235]; autophagosome [GO:0005776]; cytoplasm [GO:0005737]; cytoplasmic vesicle [GO:0031410]; cytosol [GO:0005829]; endoplasmic reticulum [GO:0005783]; nucleoplasm [GO:0005654]; perinuclear region of cytoplasm [GO:0048471]; plasma membrane [GO:0005886]; proteasome complex [GO:0000502]; protein-containing complex [GO:0032991]		1269.34	1117.75	1212.84	980.878	1086.98	1076.38	1095.6	1151.45	1130.62	1068.45	1075.58	1110.96	proteasome complex
Q8VDM4	Psmd2	PSMD2_MOUSE	Q8VDM4	26S proteasome non-ATPase regulatory subunit 2 (26S proteasome regulatory subunit RPN1) (26S proteasome regulatory subunit S2) (26S proteasome subunit p97)	Psmd2	FUNCTION: Component of the 26S proteasome, a multiprotein complex involved in the ATP-dependent degradation of ubiquitinated proteins. This complex plays a key role in the maintenance of protein homeostasis by removing misfolded or damaged proteins, which could impair cellular functions, and by removing proteins whose functions are no longer required. Therefore, the proteasome participates in num…	Acetylation;Phosphoprotein;Proteasome;Reference proteome;Repeat	proteasome-mediated ubiquitin-dependent protein catabolic process [GO:0043161]; regulation of protein catabolic process [GO:0042176]	enzyme regulator activity [GO:0030234]	nucleus [GO:0005634]; proteasome accessory complex [GO:0022624]; proteasome complex [GO:0000502]; proteasome regulatory particle [GO:0005838]; proteasome regulatory particle, base subcomplex [GO:0008540]; proteasome storage granule [GO:0034515]		5989.08	5917.48	5985.33	6139.96	6134	5965.72	6048.75	5945.75	5662.45	5463.45	5331.55	5410.02	proteasome complex&proteasome regulatory particle&proteasome accessory complex
Q91WG4	Elp2	ELP2_MOUSE	Q91WG4	Elongator complex protein 2 (ELP2) (STAT3-interacting protein 1) (StIP1)	Elp2 Statip1	FUNCTION: Component of the elongator complex which is required for multiple tRNA modifications, including mcm5U (5-methoxycarbonylmethyl uridine), mcm5s2U (5-methoxycarbonylmethyl-2-thiouridine), and ncm5U (5-carbamoylmethyl uridine). The elongator comple catalyzes the formation of carboxymethyluridine in the wobble base at position 34 in tRNAs. {ECO:0000250|UniProtKB:Q6IA86}.	3D-structure;Alternative splicing;Cytoplasm;Nucleus;Reference proteome;Repeat;tRNA processing;WD repeat	proteasome assembly [GO:0043248]; regulation of receptor signaling pathway via JAK-STAT [GO:0046425]; transcription elongation by RNA polymerase II [GO:0006368]; tRNA wobble uridine modification [GO:0002098]	endopeptidase activator activity [GO:0061133]; protein kinase binding [GO:0019901]; RNA polymerase II complex binding [GO:0000993]	cytosol [GO:0005829]; elongator holoenzyme complex [GO:0033588]; nucleoplasm [GO:0005654]; proteasome complex [GO:0000502]; transcription elongation factor complex [GO:0008023]	PATHWAY: tRNA modification; 5-methoxycarbonylmethyl-2-thiouridine-tRNA biosynthesis. {ECO:0000250|UniProtKB:Q6IA86}.	708.356	764.155	731.641	809.51	743.318	792.098	704.83	763.886	750.774	779.687	705.152	713.476	proteasome complex
Q99JI4	Psmd6	PSMD6_MOUSE	Q99JI4	26S proteasome non-ATPase regulatory subunit 6 (26S proteasome regulatory subunit RPN7) (26S proteasome regulatory subunit S10) (p42A)	Psmd6	FUNCTION: Component of the 26S proteasome, a multiprotein complex involved in the ATP-dependent degradation of ubiquitinated proteins. This complex plays a key role in the maintenance of protein homeostasis by removing misfolded or damaged proteins, which could impair cellular functions, and by removing proteins whose functions are no longer required. Therefore, the proteasome participates in num…	Proteasome;Reference proteome	proteasome-mediated ubiquitin-dependent protein catabolic process [GO:0043161]		proteasome accessory complex [GO:0022624]; proteasome complex [GO:0000502]; proteasome regulatory particle [GO:0005838]		2947.36	2756.33	3059.31	2990.75	2738.99	2612.39	2721.89	2491.27	2470.33	2495.95	2706.56	2632.9	proteasome complex&proteasome regulatory particle&proteasome accessory complex
Q99NB8	Ubqln4	UBQL4_MOUSE	Q99NB8	Ubiquilin-4 (Ataxin-1 interacting ubiquitin-like protein) (A1Up) (Ataxin-1 ubiquitin-like-interacting protein A1U) (Connexin43-interacting protein of 75 kDa) (CIP75)	Ubqln4 Cip75 Ubin	FUNCTION: Regulator of protein degradation that mediates the proteasomal targeting of misfolded, mislocalized or accumulated proteins (By similarity). Acts by binding polyubiquitin chains of target proteins via its UBA domain and by interacting with subunits of the proteasome via its ubiquitin-like domain (By similarity). Key regulator of DNA repair that represses homologous recombination repair:…	3D-structure;Autophagy;Chromosome;Cytoplasm;Cytoplasmic vesicle;DNA damage;DNA repair;Endoplasmic reticulum;Isopeptide bond;Nucleus;Phosphoprotein;Reference proteome;Ubl conjugation	autophagy [GO:0006914]; DNA damage response [GO:0006974]; DNA repair [GO:0006281]; negative regulation of autophagosome maturation [GO:1901097]; negative regulation of double-strand break repair via homologous recombination [GO:2000042]; regulation of proteasomal ubiquitin-dependent protein catabolic process [GO:0032434]; ubiquitin-dependent protein catabolic process [GO:0006511]	identical protein binding [GO:0042802]; K48-linked polyubiquitin modification-dependent protein binding [GO:0036435]; polyubiquitin modification-dependent protein binding [GO:0031593]	autophagosome [GO:0005776]; cytoplasm [GO:0005737]; cytoplasmic vesicle [GO:0031410]; cytosol [GO:0005829]; cytosolic proteasome complex [GO:0031597]; endoplasmic reticulum membrane [GO:0005789]; nuclear proteasome complex [GO:0031595]; nucleoplasm [GO:0005654]; nucleus [GO:0005634]; perinuclear region of cytoplasm [GO:0048471]; protein-containing complex [GO:0032991]; site of DNA damage [GO:0090…		990.943	958.037	865.18	934.76	1013.01	927.094	974.727	993.982	1041.74	1031.19	1143.17	1075.58	proteasome complex
Q9CX56	Psmd8	Q9CPS5_MOUSE;PSMD8_MOUSE	Q9CX56	26S proteasome non-ATPase regulatory subunit 8 (26S proteasome regulatory subunit RPN12) (26S proteasome regulatory subunit S14)	Psmd8	FUNCTION: Component of the 26S proteasome, a multiprotein complex involved in the ATP-dependent degradation of ubiquitinated proteins. This complex plays a key role in the maintenance of protein homeostasis by removing misfolded or damaged proteins, which could impair cellular functions, and by removing proteins whose functions are no longer required. Therefore, the proteasome participates in num…	Isopeptide bond;Proteasome;Reference proteome;Ubl conjugation	proteasome-mediated ubiquitin-dependent protein catabolic process [GO:0043161]		nucleus [GO:0005634]; proteasome accessory complex [GO:0022624]; proteasome complex [GO:0000502]; proteasome regulatory particle, lid subcomplex [GO:0008541]		1301.83	1177.58	1173.71	1312.01	1329.5	1109.84	1311.71	1120.14	1092.34	1162.01	1103.45	1079.26	proteasome complex&proteasome regulatory particle&proteasome accessory complex
Q9CXT8	Pmpcb	MPPB_MOUSE	Q9CXT8	Mitochondrial-processing peptidase subunit beta (EC 3.4.24.64) (Beta-MPP) (P-52)	Pmpcb	FUNCTION: Catalytic subunit of the essential mitochondrial processing protease (MPP), which cleaves the mitochondrial sequence off newly imported precursors proteins (By similarity). Preferentially, cleaves after an arginine at position P2 (By similarity). Required for PINK1 turnover by coupling PINK1 mitochondrial import and cleavage, which results in subsequent PINK1 proteolysis (By similarity)…	Hydrolase;Metal-binding;Metalloprotease;Mitochondrion;Protease;Reference proteome;Transit peptide;Zinc	protein processing [GO:0016485]; protein processing involved in protein targeting to mitochondrion [GO:0006627]	endopeptidase activity [GO:0004175]; metal ion binding [GO:0046872]; metalloendopeptidase activity [GO:0004222]; metallopeptidase activity [GO:0008237]	mitochondrial inner membrane [GO:0005743]; mitochondrial processing peptidase complex [GO:0017087]; mitochondrion [GO:0005739]		1518.05	1564.84	1367.03	1232.84	1311.74	1377.07	1169.28	1197.91	1354.55	1373.74	1271.84	1307.78	peptidase complex
Q9D8W5	Psmd12	PSD12_MOUSE	Q9D8W5	26S proteasome non-ATPase regulatory subunit 12 (26S proteasome regulatory subunit RPN5) (26S proteasome regulatory subunit p55)	Psmd12	FUNCTION: Component of the 26S proteasome, a multiprotein complex involved in the ATP-dependent degradation of ubiquitinated proteins. This complex plays a key role in the maintenance of protein homeostasis by removing misfolded or damaged proteins, which could impair cellular functions, and by removing proteins whose functions are no longer required. Therefore, the proteasome participates in num…	Acetylation;Isopeptide bond;Proteasome;Reference proteome;Ubl conjugation			cytoplasm [GO:0005737]; proteasome accessory complex [GO:0022624]; proteasome complex [GO:0000502]; proteasome regulatory particle [GO:0005838]; proteasome regulatory particle, lid subcomplex [GO:0008541]		3190.28	2863.86	3219.82	3375.42	3181.07	3085.28	2578.42	2633.81	2415.5	2825.12	2546.22	2698.16	proteasome complex&proteasome regulatory particle&proteasome accessory complex
Q9JMA1	Usp14	UBP14_MOUSE	Q9JMA1	Ubiquitin carboxyl-terminal hydrolase 14 (EC 3.4.19.12) (Deubiquitinating enzyme 14) (Ubiquitin thioesterase 14) (Ubiquitin-specific-processing protease 14)	Usp14	FUNCTION: Proteasome-associated deubiquitinase which releases ubiquitin from the proteasome targeted ubiquitinated proteins (PubMed:16190881). Ensures the regeneration of ubiquitin at the proteasome. Is a reversibly associated subunit of the proteasome and a large fraction of proteasome-free protein exists within the cell. Required for the degradation of the chemokine receptor CXCR4 which is crit…	3D-structure;Acetylation;Cell membrane;Cytoplasm;Hydrolase;Immunity;Innate immunity;Membrane;Phosphoprotein;Protease;Proteasome;Reference proteome;Thiol protease;Ubl conjugation pathway	chemical synaptic transmission [GO:0007268]; innate immune response [GO:0045087]; negative regulation of ER-associated ubiquitin-dependent protein catabolic process [GO:1903070]; proteasome-mediated ubiquitin-dependent protein catabolic process [GO:0043161]; protein deubiquitination [GO:0016579]; regulation of chemotaxis [GO:0050920]; regulation of proteasomal protein catabolic process [GO:006113…	cysteine-type deubiquitinase activity [GO:0004843]; endopeptidase inhibitor activity [GO:0004866]; K63-linked deubiquitinase activity [GO:0061578]; proteasome binding [GO:0070628]	cell surface [GO:0009986]; cytoplasmic vesicle [GO:0031410]; cytosol [GO:0005829]; plasma membrane [GO:0005886]; proteasome complex [GO:0000502]; synapse [GO:0045202]		1907.65	1861.32	1808.94	1585.99	1928.35	1700.65	1794.43	1826.98	1821.29	1785.22	2033.9	1797.2	proteasome complex
Q9QUM9	Psma6	PSA6_MOUSE	Q9QUM9	Proteasome subunit alpha type-6 (Macropain iota chain) (Multicatalytic endopeptidase complex iota chain) (Proteasome iota chain)	Psma6	FUNCTION: Component of the 20S core proteasome complex involved in the proteolytic degradation of most intracellular proteins. This complex plays numerous essential roles within the cell by associating with different regulatory particles. Associated with two 19S regulatory particles, forms the 26S proteasome and thus participates in the ATP-dependent degradation of ubiquitinated proteins. The 26S…	3D-structure;Acetylation;Cytoplasm;Direct protein sequencing;Glycoprotein;Nucleus;Phosphoprotein;Proteasome;Reference proteome	positive regulation of NF-kappaB transcription factor activity [GO:0051092]; proteolysis involved in protein catabolic process [GO:0051603]; skeletal muscle tissue development [GO:0007519]; ubiquitin-dependent protein catabolic process [GO:0006511]	NF-kappaB binding [GO:0051059]; RNA binding [GO:0003723]	cytoplasm [GO:0005737]; cytosol [GO:0005829]; myofibril [GO:0030016]; nuclear matrix [GO:0016363]; nucleoplasm [GO:0005654]; nucleus [GO:0005634]; P-body [GO:0000932]; polysome [GO:0005844]; proteasome complex [GO:0000502]; proteasome core complex [GO:0005839]; proteasome core complex, alpha-subunit complex [GO:0019773]; sarcomere [GO:0030017]		3275.41	2812.63	2877.19	2459.49	2623.44	2426.88	2338.38	2429.43	2249.97	2608.3	2663.85	2685.57	proteasome complex
Q9R1P1	Psmb3	PSB3_MOUSE	Q9R1P1	Proteasome subunit beta type-3 (Proteasome chain 13) (Proteasome component C10-II) (Proteasome theta chain)	Psmb3	FUNCTION: Non-catalytic component of the 20S core proteasome complex involved in the proteolytic degradation of most intracellular proteins. This complex plays numerous essential roles within the cell by associating with different regulatory particles. Associated with two 19S regulatory particles, forms the 26S proteasome and thus participates in the ATP-dependent degradation of ubiquitinated pro…	3D-structure;Acetylation;Cytoplasm;Direct protein sequencing;Nucleus;Proteasome;Reference proteome	proteasome-mediated ubiquitin-dependent protein catabolic process [GO:0043161]; protein catabolic process [GO:0030163]	endopeptidase activity [GO:0004175]	cytoplasm [GO:0005737]; cytosol [GO:0005829]; nucleoplasm [GO:0005654]; nucleus [GO:0005634]; proteasome complex [GO:0000502]; proteasome core complex [GO:0005839]; proteasome core complex, beta-subunit complex [GO:0019774]	PATHWAY: Steroid biosynthesis; zymosterol biosynthesis; zymosterol from lanosterol: step 4/6.	831.368	774.161	737.174	731.59	774.637	765.922	732.974	706.339	672.695	662.674	709.513	669.043	proteasome complex
Q9R1P3	Psmb2	PSB2_MOUSE	Q9R1P3	Proteasome subunit beta type-2 (Macropain subunit C7-I) (Multicatalytic endopeptidase complex subunit C7-I) (Proteasome component C7-I)	Psmb2	FUNCTION: Non-catalytic component of the 20S core proteasome complex involved in the proteolytic degradation of most intracellular proteins. This complex plays numerous essential roles within the cell by associating with different regulatory particles. Associated with two 19S regulatory particles, forms the 26S proteasome and thus participates in the ATP-dependent degradation of ubiquitinated pro…	3D-structure;Acetylation;Cytoplasm;Direct protein sequencing;Nucleus;Proteasome;Reference proteome	proteasomal protein catabolic process [GO:0010498]; response to organic cyclic compound [GO:0014070]; response to organonitrogen compound [GO:0010243]		cytoplasm [GO:0005737]; cytosol [GO:0005829]; nucleoplasm [GO:0005654]; nucleus [GO:0005634]; proteasome complex [GO:0000502]; proteasome core complex [GO:0005839]; proteasome core complex, beta-subunit complex [GO:0019774]		2500.22	2430.01	2542.31	2591.02	2946.09	2604.91	2382.09	2208.53	2078.87	2316.36	2375.32	2247.23	proteasome complex
Q9R1P4	Psma1	PSA1_MOUSE	Q9R1P4	Proteasome subunit alpha type-1 (Macropain subunit C2) (Multicatalytic endopeptidase complex subunit C2) (Proteasome component C2) (Proteasome nu chain)	Psma1	FUNCTION: Component of the 20S core proteasome complex involved in the proteolytic degradation of most intracellular proteins. This complex plays numerous essential roles within the cell by associating with different regulatory particles. Associated with two 19S regulatory particles, forms the 26S proteasome and thus participates in the ATP-dependent degradation of ubiquitinated proteins. The 26S…	3D-structure;Acetylation;Cytoplasm;Direct protein sequencing;Glycoprotein;Immunity;Isopeptide bond;Nucleus;Phosphoprotein;Proteasome;Reference proteome;Ubl conjugation	immune system process [GO:0002376]; negative regulation of inflammatory response to antigenic stimulus [GO:0002862]; ubiquitin-dependent protein catabolic process [GO:0006511]	lipopolysaccharide binding [GO:0001530]	centrosome [GO:0005813]; cytoplasm [GO:0005737]; cytosol [GO:0005829]; nucleoplasm [GO:0005654]; nucleus [GO:0005634]; proteasome complex [GO:0000502]; proteasome core complex [GO:0005839]; proteasome core complex, alpha-subunit complex [GO:0019773]		2477.07	2745.95	2809.34	2357.14	2519.98	2543.22	2738.34	2654.17	2428.95	2229.77	2457.37	2315.6	proteasome complex
Q9WUP7	Uchl5	UCHL5_MOUSE	Q9WUP7	Ubiquitin carboxyl-terminal hydrolase isozyme L5 (UCH-L5) (EC 3.4.19.12) (Ubiquitin C-terminal hydrolase UCH37) (Ubiquitin thioesterase L5)	Uchl5 Uch37	FUNCTION: Protease that specifically cleaves 'Lys-48'-linked polyubiquitin chains. Deubiquitinating enzyme associated with the 19S regulatory subunit of the 26S proteasome. Putative regulatory component of the INO80 complex; however is inactive in the INO80 complex and is activated by a transient interaction of the INO80 complex with the proteasome via ADRM1 (By similarity). {ECO:0000250}.	3D-structure;Acetylation;Alternative splicing;Cytoplasm;DNA damage;DNA recombination;DNA repair;Hydrolase;Nucleus;Protease;Proteasome;Reference proteome;Thiol protease;Transcription;Transcription regulation;Ubl conjugation pathway	chromatin remodeling [GO:0006338]; DNA recombination [GO:0006310]; DNA repair [GO:0006281]; forebrain morphogenesis [GO:0048853]; lateral ventricle development [GO:0021670]; midbrain development [GO:0030901]; negative regulation of proteasomal ubiquitin-dependent protein catabolic process [GO:0032435]; positive regulation of DNA repair [GO:0045739]; positive regulation of DNA-templated transcript…	cysteine-type deubiquitinase activity [GO:0004843]; endopeptidase inhibitor activity [GO:0004866]; proteasome binding [GO:0070628]	cytoplasm [GO:0005737]; cytosol [GO:0005829]; cytosolic proteasome complex [GO:0031597]; Ino80 complex [GO:0031011]; nucleolus [GO:0005730]; nucleoplasm [GO:0005654]; nucleus [GO:0005634]	PATHWAY: Protein modification; protein glycosylation. {ECO:0000269|PubMed:20637498}.	1289.8	1130.68	1126.63	1167.18	1208.57	1080.18	1092.69	1147.03	1055.6	1180.85	1178.27	1166.64	proteasome complex
Q9WVJ2	Psmd13	PSD13_MOUSE	Q9WVJ2	26S proteasome non-ATPase regulatory subunit 13 (26S proteasome regulatory subunit RPN9) (26S proteasome regulatory subunit S11) (26S proteasome regulatory subunit p40.5)	Psmd13	FUNCTION: Component of the 26S proteasome, a multiprotein complex involved in the ATP-dependent degradation of ubiquitinated proteins. This complex plays a key role in the maintenance of protein homeostasis by removing misfolded or damaged proteins, which could impair cellular functions, and by removing proteins whose functions are no longer required. Therefore, the proteasome participates in num…	Acetylation;Direct protein sequencing;Proteasome;Reference proteome	meiosis I [GO:0007127]; ubiquitin-dependent protein catabolic process [GO:0006511]	endopeptidase activity [GO:0004175]; structural molecule activity [GO:0005198]	cytosol [GO:0005829]; nucleus [GO:0005634]; proteasome accessory complex [GO:0022624]; proteasome complex [GO:0000502]; proteasome regulatory particle [GO:0005838]; proteasome regulatory particle, lid subcomplex [GO:0008541]		2802.26	2750.11	2954.64	2776.8	3132.53	2922.25	2789.01	2796.87	2685.42	2889.7	3070.37	2777.75	proteasome complex&proteasome regulatory particle&proteasome accessory complex
Q9Z2U1	Psma5	PSA5_MOUSE	Q9Z2U1	Proteasome subunit alpha type-5 (Macropain zeta chain) (Multicatalytic endopeptidase complex zeta chain) (Proteasome zeta chain)	Psma5	FUNCTION: Component of the 20S core proteasome complex involved in the proteolytic degradation of most intracellular proteins. This complex plays numerous essential roles within the cell by associating with different regulatory particles. Associated with two 19S regulatory particles, forms the 26S proteasome and thus participates in the ATP-dependent degradation of ubiquitinated proteins. The 26S…	3D-structure;Acetylation;Cytoplasm;Direct protein sequencing;Glycoprotein;Nucleus;Phosphoprotein;Proteasome;Reference proteome	proteasome-mediated ubiquitin-dependent protein catabolic process [GO:0043161]		cytoplasm [GO:0005737]; cytosol [GO:0005829]; nucleoplasm [GO:0005654]; nucleus [GO:0005634]; proteasome complex [GO:0000502]; proteasome core complex [GO:0005839]; proteasome core complex, alpha-subunit complex [GO:0019773]		6894.28	7251	6842.27	6835.92	6334.9	6419.04	7259.62	6808.06	6960.99	5899.44	6340.05	6283.59	proteasome complex
Q9Z2X2	Psmd10	PSD10_MOUSE	Q9Z2X2	26S proteasome non-ATPase regulatory subunit 10 (26S proteasome regulatory subunit p28) (Gankyrin)	Psmd10	FUNCTION: Acts as a chaperone during the assembly of the 26S proteasome, specifically of the PA700/19S regulatory complex (RC). In the initial step of the base subcomplex assembly is part of an intermediate PSMD10:PSMC4:PSMC5:PAAF1 module which probably assembles with a PSMD5:PSMC2:PSMC1:PSMD2 module (By similarity). Independently of the proteasome, regulates EGF-induced AKT activation through in…	3D-structure;ANK repeat;Apoptosis;Chaperone;Cytoplasm;Nucleus;Reference proteome;Repeat	apoptotic process [GO:0006915]; cytoplasmic sequestering of NF-kappaB [GO:0007253]; negative regulation of apoptotic process [GO:0043066]; negative regulation of DNA damage response, signal transduction by p53 class mediator [GO:0043518]; negative regulation of MAPK cascade [GO:0043409]; negative regulation of NF-kappaB transcription factor activity [GO:0032088]; negative regulation of release of…	cytoskeletal protein binding [GO:0008092]; protein-macromolecule adaptor activity [GO:0030674]; RNA polymerase II-specific DNA-binding transcription factor binding [GO:0061629]; transmembrane transporter binding [GO:0044325]	cytoplasm [GO:0005737]; cytoskeleton [GO:0005856]; cytosol [GO:0005829]; intermediate filament cytoskeleton [GO:0045111]; neuron projection [GO:0043005]; nucleus [GO:0005634]; plasma membrane [GO:0005886]; proteasome complex [GO:0000502]; proteasome regulatory particle, base subcomplex [GO:0008540]		526.474	457.437	485.097	456.373	470.109	506.099	546.991	447.074	478.916	456.573	493.398	449.854	proteasome complex&proteasome regulatory particle
A0A087WPH7	Psmc3	A0A087WPH7_MOUSE	A0A087WPH7	Proteasome (prosome, macropain) 26S subunit, ATPase 3	Psmc3		Phosphoprotein;Proteomics identification;Reference proteome		ATP binding [GO:0005524]; ATP hydrolysis activity [GO:0016887]	nucleus [GO:0005634]		400.95	491.675	673.885	481.298	456.692	324.146	630.878	556.807	559.339	476.624	364.625	431.48	Proteasome&Peptidase
Q2HXL6	Edem3	A0A087WQK5_MOUSE;A0A087WR24_MOUSE;B7ZNP0_MOUSE;EDEM3_MOUSE	Q2HXL6	ER degradation-enhancing alpha-mannosidase-like protein 3 (EC 3.2.1.113) (Alpha-1,2-mannosidase EDEM3)	Edem3	FUNCTION: Involved in endoplasmic reticulum-associated degradation (ERAD). Accelerates the glycoprotein ERAD by proteasomes, by catalyzing mannose trimming from Man8GlcNAc2 to Man7GlcNAc2 in the N-glycans. May also participate in mannose trimming from all glycoproteins and not just misfolded ones targeted to ERAD (PubMed:34143952). May have alpha 1,2-mannosidase activity. {ECO:0000250|UniProtKB:Q…	Endoplasmic reticulum;Glycoprotein;Hydrolase;Metal-binding;Reference proteome;Signal;Unfolded protein response	carbohydrate metabolic process [GO:0005975]; endoplasmic reticulum mannose trimming [GO:1904380]; glycoprotein catabolic process [GO:0006516]; mannose trimming involved in glycoprotein ERAD pathway [GO:1904382]; proteasome-mediated ubiquitin-dependent protein catabolic process [GO:0043161]; protein glycosylation [GO:0006486]; response to unfolded protein [GO:0006986]	calcium ion binding [GO:0005509]; mannosyl-oligosaccharide 1,2-alpha-mannosidase activity [GO:0004571]	endoplasmic reticulum [GO:0005783]; endoplasmic reticulum lumen [GO:0005788]; endoplasmic reticulum quality control compartment [GO:0044322]; membrane [GO:0016020]	PATHWAY: Protein modification; protein glycosylation. {ECO:0000250|UniProtKB:P32906}.	490.048	511.704	507.41	550.763	504.044	467.108	475.777	505.58	564.634	539.661	536.71	566.113	Proteasome&Peptidase
A0A087WQR6	Tpp2	A0A087WQR6_MOUSE	A0A087WQR6	Tripeptidyl peptidase II	Tpp2		Proteomics identification;Reference proteome					91.5726	141.774	162.417	103.067	262.12	120.676	168.291	95.462	205.001	123.668	139.387	141.481	Proteasome&Peptidase
P54729	Nub1	A0A0G2JGQ4_MOUSE;NUB1_MOUSE	P54729	NEDD8 ultimate buster 1 (Negative regulator of ubiquitin-like proteins 1) (Protein BS4)	Nub1 Nyren18	FUNCTION: Specific down-regulator of the NEDD8 conjugation system. Recruits NEDD8, UBD, and their conjugates to the proteasome for degradation (By similarity). {ECO:0000250}.	3D-structure;Coiled coil;Nucleus;Reference proteome;Repeat	positive regulation of proteasomal ubiquitin-dependent protein catabolic process [GO:0032436]; proteasomal protein catabolic process [GO:0010498]; protein ubiquitination [GO:0016567]; regulation of ubiquitin-dependent protein catabolic process [GO:2000058]; ubiquitin-dependent protein catabolic process [GO:0006511]		cytosol [GO:0005829]; Lewy body [GO:0097413]; nucleolus [GO:0005730]; nucleoplasm [GO:0005654]; nucleus [GO:0005634]		912.582	906.336	855.131	1075.65	1101.27	995.795	919.605	1039.05	1033.22	988.391	1002.55	976.914	Proteasome&Peptidase
Q8C1A5	Thop1	A0A0R4IZY0_MOUSE;THOP1_MOUSE	Q8C1A5	Thimet oligopeptidase (EC 3.4.24.15)	Thop1	FUNCTION: Involved in the metabolism of neuropeptides under 20 amino acid residues long (PubMed:10969067). Involved in cytoplasmic peptide degradation. Able to degrade the amyloid-beta precursor protein and generate amyloidogenic fragments (By similarity). Also acts as a regulator of cannabinoid signaling pathway by mediating degradation of hemopressin, an antagonist peptide of the cannabinoid re…	Acetylation;Cytoplasm;Hydrolase;Metal-binding;Metalloprotease;Phosphoprotein;Protease;Reference proteome;Zinc	intracellular signal transduction [GO:0035556]; peptide catabolic process [GO:0043171]; peptide metabolic process [GO:0006518]; proteolysis [GO:0006508]	metal ion binding [GO:0046872]; metalloendopeptidase activity [GO:0004222]; peptidase activity [GO:0008233]; peptide binding [GO:0042277]	mitochondrial intermembrane space [GO:0005758]		1246.58	1252.79	1220.74	1101.85	1145.55	1194.58	1240.1	1256.31	1282.11	1239.69	1306.98	1147.15	Proteasome&Peptidase
Q7TMR0	Prcp	A0A140LHY2_MOUSE;PCP_MOUSE	Q7TMR0	Lysosomal Pro-X carboxypeptidase (EC 3.4.16.2) (Proline carboxypeptidase) (Prolylcarboxypeptidase) (PRCP)	Prcp	FUNCTION: Cleaves C-terminal amino acids linked to proline in peptides such as angiotensin II, III and des-Arg9-bradykinin. This cleavage occurs at acidic pH, but enzymatic activity is retained with some substrates at neutral pH (By similarity). {ECO:0000250}.	Alternative splicing;Carboxypeptidase;Disulfide bond;Glycoprotein;Hydrolase;Lysosome;Protease;Reference proteome;Signal;Zymogen	angiogenesis involved in wound healing [GO:0060055]; energy homeostasis [GO:0097009]; glucose homeostasis [GO:0042593]; negative regulation of systemic arterial blood pressure [GO:0003085]; plasma kallikrein-kinin cascade [GO:0002353]; proteolysis [GO:0006508]; regulation of blood vessel endothelial cell migration [GO:0043535]; regulation of reactive oxygen species metabolic process [GO:2000377];…	dipeptidyl-peptidase activity [GO:0008239]; serine-type carboxypeptidase activity [GO:0004185]	basal part of cell [GO:0045178]; intracellular membrane-bounded organelle [GO:0043231]; lysosome [GO:0005764]		189.967	155.65	172.896	212.792	246.726	196.53	227.225	236.782	333.564	247.964	212.43	305.982	Proteasome&Peptidase
Q8CFE3	Rcor1	A0A140T8R7_MOUSE;RCOR1_MOUSE	Q8CFE3	REST corepressor 1 (Protein CoREST)	Rcor1 D12Wsu95e Kiaa0071	FUNCTION: Essential component of the BHC complex, a corepressor complex that represses transcription of neuron-specific genes in non-neuronal cells. The BHC complex is recruited at RE1/NRSE sites by REST and acts by deacetylating and demethylating specific sites on histones, thereby acting as a chromatin modifier. In the BHC complex, it serves as a molecular beacon for the recruitment of molecula…	Chromatin regulator;Coiled coil;Isopeptide bond;Nucleus;Phosphoprotein;Reference proteome;Repeat;Repressor;Transcription;Transcription regulation;Ubl conjugation	chromatin organization [GO:0006325]; erythrocyte differentiation [GO:0030218]; negative regulation of DNA-templated transcription [GO:0045892]; negative regulation of gene expression [GO:0010629]; positive regulation of megakaryocyte differentiation [GO:0045654]; regulation of transcription by RNA polymerase II [GO:0006357]	chromatin binding [GO:0003682]; enzyme binding [GO:0019899]; transcription corepressor activity [GO:0003714]	DNA repair complex [GO:1990391]; histone deacetylase complex [GO:0000118]; nucleoplasm [GO:0005654]; nucleus [GO:0005634]; transcription regulator complex [GO:0005667]; transcription repressor complex [GO:0017053]		604.111	492.279	483.204	454.609	442.267	458.4	448.921	486.693	437.878	713.889	665.821	658.815	Proteasome&Peptidase
Q7TMK6	Hook2	A0A1B0GT78_MOUSE;HOOK2_MOUSE	Q7TMK6	Protein Hook homolog 2 (mHK2)	Hook2	FUNCTION: Component of the FTS/Hook/FHIP complex (FHF complex). The FHF complex may function to promote vesicle trafficking and/or fusion via the homotypic vesicular protein sorting complex (the HOPS complex). Contributes to the establishment and maintenance of centrosome function. May function in the positioning or formation of aggresomes, which are pericentriolar accumulations of misfolded prot…	Coiled coil;Cytoplasm;Cytoskeleton;Golgi apparatus;Microtubule;Phosphoprotein;Protein transport;Reference proteome;Transport	cytoplasmic microtubule organization [GO:0031122]; cytoskeleton-dependent intracellular transport [GO:0030705]; early endosome to late endosome transport [GO:0045022]; endosome organization [GO:0007032]; endosome to lysosome transport [GO:0008333]; lysosome organization [GO:0007040]; protein localization to perinuclear region of cytoplasm [GO:1905719]; protein transport [GO:0015031]	dynein light intermediate chain binding [GO:0051959]; identical protein binding [GO:0042802]; microtubule binding [GO:0008017]	centrosome [GO:0005813]; cytoplasm [GO:0005737]; cytosol [GO:0005829]; FHF complex [GO:0070695]; HOPS complex [GO:0030897]; intracellular membrane-bounded organelle [GO:0043231]; microtubule [GO:0005874]; trans-Golgi network [GO:0005802]		109.135	74.6262	51.9849	54.778	48.0008	61.2086	59.1452	43.5407	30.5588	54.6952	102.119	77.4804	Proteasome&Peptidase
Q9Z2V5	Hdac6	A0A1B0GX25_MOUSE;HDAC6_MOUSE	Q9Z2V5	Histone deacetylase 6 (HD6) (EC 3.5.1.98) (Histone deacetylase mHDA2) (Tubulin-lysine deacetylase HDAC6) (EC 3.5.1.-)	Hdac6	FUNCTION: Responsible for the deacetylation of lysine residues on the N-terminal part of the core histones (H2A, H2B, H3 and H4) (PubMed:9891014). Histone deacetylation gives a tag for epigenetic repression and plays an important role in transcriptional regulation, cell cycle progression and developmental events (PubMed:9891014). Histone deacetylases act via the formation of large multiprotein co…	Actin-binding;Cell projection;Chromatin regulator;Cytoplasm;Cytoskeleton;Hydrolase;Metal-binding;Methylation;Nucleus;Phosphoprotein;Reference proteome;Repeat;Repressor;Transcription;Transcription regulation;Ubl conjugation;Zinc;Zinc-finger	aggresome assembly [GO:0070842]; axonal transport of mitochondrion [GO:0019896]; cellular response to hydrogen peroxide [GO:0070301]; cellular response to misfolded protein [GO:0071218]; cellular response to parathyroid hormone stimulus [GO:0071374]; cellular response to topologically incorrect protein [GO:0035967]; cilium disassembly [GO:0061523]; collateral sprouting [GO:0048668]; dendritic spi…	actin binding [GO:0003779]; alpha-tubulin binding [GO:0043014]; beta-catenin binding [GO:0008013]; beta-tubulin binding [GO:0048487]; dynein complex binding [GO:0070840]; histone deacetylase activity [GO:0004407]; histone deacetylase binding [GO:0042826]; Hsp90 protein binding [GO:0051879]; microtubule binding [GO:0008017]; misfolded protein binding [GO:0051787]; polyubiquitin modification-depend…	aggresome [GO:0016235]; axon [GO:0030424]; axon cytoplasm [GO:1904115]; caveola [GO:0005901]; cell leading edge [GO:0031252]; centrosome [GO:0005813]; ciliary basal body [GO:0036064]; cytoplasm [GO:0005737]; cytosol [GO:0005829]; dendrite [GO:0030425]; histone deacetylase complex [GO:0000118]; inclusion body [GO:0016234]; microtubule [GO:0005874]; microtubule associated complex [GO:0005875]; micr…		569.167	513.932	572.46	645.169	549.006	599.351	530.342	550.442	511.759	634.666	663.536	594.408	Proteasome&Peptidase
Q91WE2	Psme3ip1	A0A1D5RLD7_MOUSE;A0A1D5RLF2_MOUSE;A0A1D5RLI3_MOUSE;A0A1D5RLJ3_MOUSE;A0A1D5RLT4_MOUSE;A0A1D5RLU2_MOUSE;A0A1D5RLW0_MOUSE;A0A1D5RLX7_MOUSE;A0A1D5RLY1_MOUSE;PIP30_MOUSE	Q91WE2	PSME3-interacting protein (NEFA-interacting nuclear protein NIP30) (PA28G-interacting protein)	Psme3ip1 Fam192a Nip30	FUNCTION: Promotes the association of the proteasome activator complex subunit PSME3 with the 20S proteasome and regulates its activity. Inhibits PSME3-mediated degradation of some proteasome substrates, probably by affecting their diffusion rate into the catalytic chamber of the proteasome. Also inhibits the interaction of PSME3 with COIL, inhibits accumulation of PSME3 in Cajal bodies and posit…	Acetylation;Nucleus;Phosphoprotein;Reference proteome	negative regulation of proteasomal protein catabolic process [GO:1901799]; negative regulation of protein binding [GO:0032091]		intracellular membrane-bounded organelle [GO:0043231]; nucleoplasm [GO:0005654]; nucleus [GO:0005634]		668.893	722.956	700.37	621.657	667.05	611.454	591.672	559.703	545.077	605.388	616.223	653.434	Proteasome&Peptidase
Q80YA7	Dpp8	A0A1L1STG9_MOUSE;DPP8_MOUSE	Q80YA7	Dipeptidyl peptidase 8 (DP8) (EC 3.4.14.5) (Dipeptidyl peptidase VIII) (DPP VIII)	Dpp8	FUNCTION: Dipeptidyl peptidase that cleaves off N-terminal dipeptides from proteins having a Pro or Ala residue at position 2 (By similarity). Acts as a key inhibitor of caspase-1-dependent monocyte and macrophage pyroptosis in resting cells by preventing activation of NLRP1 and CARD8 (PubMed:27820798, PubMed:29396289). Sequesters the cleaved C-terminal part of NLRP1 and CARD8, which respectively…	Aminopeptidase;Cytoplasm;Hydrolase;Protease;Reference proteome;Serine protease	negative regulation of programmed cell death [GO:0043069]; proteolysis [GO:0006508]	aminopeptidase activity [GO:0004177]; dipeptidyl-peptidase activity [GO:0008239]; serine-type peptidase activity [GO:0008236]	cytoplasm [GO:0005737]; cytosol [GO:0005829]		305.321	213.481	126.998	201.389	200.943	175.824	125.493	118.309	385.069	NaN	NaN	194.118	Proteasome&Peptidase
Q3TD49	Sppl2b	A0A1W2P794_MOUSE;SPP2B_MOUSE	Q3TD49	Signal peptide peptidase-like 2B (SPP-like 2B) (SPPL2b) (EC 3.4.23.-)	Sppl2b	FUNCTION: Intramembrane-cleaving aspartic protease (I-CLiP) that cleaves type II membrane signal peptides in the hydrophobic plane of the membrane. Functions in ITM2B and TNF processing. Catalyzes the intramembrane cleavage of the anchored fragment of shed TNF-alpha (TNF), which promotes the release of the intracellular domain (ICD) for signaling to the nucleus. May play a role in the regulation …	Alternative splicing;Cell membrane;Endosome;Glycoprotein;Golgi apparatus;Hydrolase;Lysosome;Membrane;Protease;Reference proteome;Signal;Transmembrane;Transmembrane helix	membrane protein ectodomain proteolysis [GO:0006509]; membrane protein intracellular domain proteolysis [GO:0031293]; membrane protein proteolysis [GO:0033619]; regulation of immune response [GO:0050776]	aspartic endopeptidase activity, intramembrane cleaving [GO:0042500]; protein homodimerization activity [GO:0042803]	actin cytoskeleton [GO:0015629]; centrosome [GO:0005813]; cytoplasmic side of endoplasmic reticulum membrane [GO:0098554]; endosome membrane [GO:0010008]; Golgi membrane [GO:0000139]; Golgi-associated vesicle membrane [GO:0030660]; lumenal side of endoplasmic reticulum membrane [GO:0098553]; lysosomal membrane [GO:0005765]; membrane [GO:0016020]; nucleoplasm [GO:0005654]; plasma membrane [GO:0005…		203.082	190.758	172.61	214.26	179.611	180.093	193.251	214.505	205.798	174.506	187.588	223.812	Proteasome&Peptidase
D3Z1A5	Adamts6	A0A286YCD8_MOUSE;A0A286YEC9_MOUSE;D3Z1A5_MOUSE	D3Z1A5	A disintegrin-like and metallopeptidase (reprolysin type) with thrombospondin type 1 motif, 6	Adamts6		Calcium;Disulfide bond;Extracellular matrix;Glycoprotein;Hydrolase;Metal-binding;Metalloprotease;Protease;Reference proteome;Repeat;Secreted;Signal;Zinc	aorta development [GO:0035904]; cardiac septum development [GO:0003279]; coronary vasculature development [GO:0060976]; extracellular matrix organization [GO:0030198]; heart development [GO:0007507]; kidney development [GO:0001822]; proteolysis [GO:0006508]	metal ion binding [GO:0046872]; metalloendopeptidase activity [GO:0004222]	extracellular matrix [GO:0031012]; extracellular region [GO:0005576]		12.9249	NaN	5.48356	7.29794	3.1966	NaN	7.17303	NaN	14.7604	3.28561	8.51688	9.9425	Proteasome&Peptidase
Q9JI78	Ngly1	A0A286YCI0_MOUSE;NGLY1_MOUSE	Q9JI78	Peptide-N(4)-(N-acetyl-beta-glucosaminyl)asparagine amidase (PNGase) (mPNGase) (EC 3.5.1.52) (N-glycanase 1) (Peptide:N-glycanase)	Ngly1	FUNCTION: Specifically deglycosylates the denatured form of N-linked glycoproteins in the cytoplasm and assists their proteasome-mediated degradation. Cleaves the beta-aspartyl-glucosamine (GlcNAc) of the glycan and the amide side chain of Asn, converting Asn to Asp. Prefers proteins containing high-mannose over those bearing complex type oligosaccharides. Can recognize misfolded proteins in the …	3D-structure;Acetylation;Cytoplasm;Hydrolase;Metal-binding;Reference proteome;Zinc	ER-associated misfolded protein catabolic process [GO:0071712]; glycoprotein catabolic process [GO:0006516]; protein deglycosylation [GO:0006517]; protein quality control for misfolded or incompletely synthesized proteins [GO:0006515]	metal ion binding [GO:0046872]; peptide-N4-(N-acetyl-beta-glucosaminyl)asparagine amidase activity [GO:0000224]	collagen-containing extracellular matrix [GO:0062023]; cytoplasm [GO:0005737]; cytosol [GO:0005829]; nucleus [GO:0005634]		226.05	193.167	160.786	177.099	173.954	188.857	181.986	164.437	246.319	172.85	217.112	217.039	Proteasome&Peptidase
Q9JK23	Psmg1	A0A3B2WB82_MOUSE;PSMG1_MOUSE	Q9JK23	Proteasome assembly chaperone 1 (Down syndrome critical region protein 2 homolog)	Psmg1 Dscr2	FUNCTION: Chaperone protein which promotes assembly of the 20S proteasome as part of a heterodimer with PSMG2. The PSMG1-PSMG2 heterodimer binds to the PSMA5 and PSMA7 proteasome subunits, promotes assembly of the proteasome alpha subunits into the heteroheptameric alpha ring and prevents alpha ring dimerization (By similarity). {ECO:0000250|UniProtKB:O95456}.	Acetylation;Chaperone;Cytoplasm;Endoplasmic reticulum;Phosphoprotein;Reference proteome	cerebellar granule cell precursor proliferation [GO:0021930]; chaperone-mediated protein complex assembly [GO:0051131]; proteasome core complex assembly [GO:0080129]	molecular adaptor activity [GO:0060090]; proteasome binding [GO:0070628]	cytoplasm [GO:0005737]; cytosol [GO:0005829]; endoplasmic reticulum [GO:0005783]; Golgi apparatus [GO:0005794]; nucleoplasm [GO:0005654]; protein folding chaperone complex [GO:0101031]		434.591	461.195	444.738	435.459	430.536	412.335	428.232	396.845	419.185	339.395	366.224	349.926	Proteasome&Peptidase
Q9WTK5	Nfkb2	A0A494B9Y5_MOUSE;A0A494BAQ2_MOUSE;NFKB2_MOUSE	Q9WTK5	Nuclear factor NF-kappa-B p100 subunit (DNA-binding factor KBF2) (Nuclear factor of kappa light polypeptide gene enhancer in B-cells 2) [Cleaved into: Nuclear factor NF-kappa-B p52 subunit]	Nfkb2	FUNCTION: NF-kappa-B is a pleiotropic transcription factor present in almost all cell types and is the endpoint of a series of signal transduction events that are initiated by a vast array of stimuli related to many biological processes such as inflammation, immunity, differentiation, cell growth, tumorigenesis and apoptosis. NF-kappa-B is a homo- or heterodimeric complex formed by the Rel-like d…	3D-structure;Activator;ANK repeat;Biological rhythms;Cytoplasm;DNA-binding;Isopeptide bond;Nucleus;Phosphoprotein;Reference proteome;Repeat;Repressor;Transcription;Transcription regulation;Ubl conjugation	extracellular matrix organization [GO:0030198]; follicular dendritic cell differentiation [GO:0002268]; germinal center formation [GO:0002467]; I-kappaB kinase/NF-kappaB signaling [GO:0007249]; inflammatory response [GO:0006954]; innate immune response [GO:0045087]; lymph node development [GO:0048535]; NIK/NF-kappaB signaling [GO:0038061]; positive regulation of transcription by RNA polymerase II…	DNA-binding transcription activator activity, RNA polymerase II-specific [GO:0001228]; DNA-binding transcription factor activity, RNA polymerase II-specific [GO:0000981]; RNA polymerase II cis-regulatory region sequence-specific DNA binding [GO:0000978]; sequence-specific double-stranded DNA binding [GO:1990837]	Bcl3/NF-kappaB2 complex [GO:0033257]; cytoplasm [GO:0005737]; cytosol [GO:0005829]; NF-kappaB complex [GO:0071159]; nucleoplasm [GO:0005654]; nucleus [GO:0005634]		2620.96	2507.58	2621.19	2144.8	2292.58	2129.32	1989.68	2050.86	2109.76	2251.37	2276.05	2243.82	Proteasome&Peptidase
A2A9S6	Agbl4	A2A9S6_MOUSE	A2A9S6	ATP/GTP binding protein-like 4	Agbl4		Proteomics identification;Reference proteome					NaN	161.681	203.45	322.256	271.828	435.035	252.16	238.334	296.828	189.031	NaN	NaN	Proteasome&Peptidase
A6H611	Mipep	MIPEP_MOUSE	A6H611	Mitochondrial intermediate peptidase (MIP) (EC 3.4.24.59)	Mipep	FUNCTION: Cleaves proteins, imported into the mitochondrion, to their mature size. {ECO:0000250}.	Acetylation;Calcium;Cobalt;Hydrolase;Iron;Magnesium;Manganese;Metal-binding;Metalloprotease;Mitochondrion;Protease;Reference proteome;Transit peptide;Zinc	peptide metabolic process [GO:0006518]; protein processing involved in protein targeting to mitochondrion [GO:0006627]	endopeptidase activity [GO:0004175]; metal ion binding [GO:0046872]; metalloendopeptidase activity [GO:0004222]	mitochondrial matrix [GO:0005759]; mitochondrion [GO:0005739]		509.835	503.663	537.695	460.601	429.41	485.047	372.502	498.004	430.711	625.479	663.86	566.395	Proteasome&Peptidase
B1AXD8	Akirin2	AKIR2_MOUSE	B1AXD8	Akirin-2	Akirin2	FUNCTION: Molecular adapter that acts as a bridge between a variety of multiprotein complexes, and which is involved in embryonic development, immunity, myogenesis and brain development (PubMed:25107474, PubMed:26041538, PubMed:27871306, PubMed:30116001, PubMed:30801883). Plays a key role in nuclear protein degradation by promoting import of proteasomes into the nucleus: directly binds to fully a…	Adaptive immunity;Cytoplasm;Developmental protein;Immunity;Innate immunity;Membrane;Nucleus;Phosphoprotein;Protein transport;Reference proteome;Repressor;Transcription;Transcription regulation;Transport	adaptive immune response [GO:0002250]; cerebral cortex development [GO:0021987]; defense response to bacterium [GO:0042742]; embryo development ending in birth or egg hatching [GO:0009792]; innate immune response [GO:0045087]; negative regulation of DNA-templated transcription [GO:0045892]; negative regulation of gene expression [GO:0010629]; negative regulation of transcription by RNA polymerase…	enzyme binding [GO:0019899]; identical protein binding [GO:0042802]; molecular function activator activity [GO:0140677]; protein-macromolecule adaptor activity [GO:0030674]; transcription coregulator activity [GO:0003712]	chromatin [GO:0000785]; cytoplasm [GO:0005737]; membrane [GO:0016020]; nucleoplasm [GO:0005654]; nucleus [GO:0005634]; transcription repressor complex [GO:0017053]		101.05	122.294	80.0452	121.833	110.417	113.399	142.247	125.117	147.812	125.116	122.976	132.331	Proteasome&Peptidase
B7ZMP1	Xpnpep3	XPP3_MOUSE	B7ZMP1	Xaa-Pro aminopeptidase 3 (X-Pro aminopeptidase 3) (EC 3.4.11.9) (Aminopeptidase P3) (APP3)	Xpnpep3	FUNCTION: Catalyzes the removal of a penultimate prolyl residue from the N-termini of peptides, such as Leu-Pro-Ala. Also shows low activity towards peptides with Ala or Ser at the P1 position. Promotes TNFRSF1B-mediated phosphorylation of MAPK8/JNK1 and MAPK9/JNK2, suggesting a function as an adapter protein for TNFRSF1B; the effect is independent of XPNPEP3 peptidase activity. May inhibit apopt…	Alternative splicing;Cytoplasm;Hydrolase;Manganese;Metal-binding;Mitochondrion;Reference proteome;Transit peptide	glomerular filtration [GO:0003094]; protein processing [GO:0016485]; proteolysis [GO:0006508]	aminopeptidase activity [GO:0004177]; manganese ion binding [GO:0030145]; metalloaminopeptidase activity [GO:0070006]; protein homodimerization activity [GO:0042803]	cytoplasm [GO:0005737]; cytosol [GO:0005829]; mitochondrion [GO:0005739]		149.878	159.16	160.395	159.658	148.798	120.24	107.72	120.089	110.126	156.886	165.52	265.713	Proteasome&Peptidase
Q3U0P1	Palb2	D3YVU6_MOUSE;PALB2_MOUSE	Q3U0P1	Partner and localizer of BRCA2	Palb2	FUNCTION: Plays a critical role in homologous recombination repair (HRR) through its ability to recruit BRCA2 and RAD51 to DNA breaks. Strongly stimulates the DNA strand-invasion activity of RAD51, stabilizes the nucleoprotein filament against a disruptive BRC3-BRC4 polypeptide and helps RAD51 to overcome the suppressive effect of replication protein A (RPA). Functionally cooperates with RAD51AP1…	3D-structure;Alternative splicing;Coiled coil;DNA damage;DNA recombination;DNA repair;DNA-binding;Nucleus;Phosphoprotein;Reference proteome;Repeat;Tumor suppressor;WD repeat	animal organ morphogenesis [GO:0009887]; apoptotic process [GO:0006915]; double-strand break repair via homologous recombination [GO:0000724]; embryonic organ development [GO:0048568]; in utero embryonic development [GO:0001701]; inner cell mass cell proliferation [GO:0001833]; mesoderm development [GO:0007498]; multicellular organism growth [GO:0035264]; negative regulation of apoptotic process …	DNA binding [GO:0003677]	DNA repair complex [GO:1990391]; nuclear speck [GO:0016607]; nucleoplasm [GO:0005654]; protein-containing complex [GO:0032991]		35.9459	49.538	34.2435	35.7256	30.0811	32.1058	40.9472	32.5431	NaN	NaN	NaN	NaN	Proteasome&Peptidase
O35047	Psmc3ip	D6RFC4_MOUSE;HOP2_MOUSE	O35047	Homologous-pairing protein 2 homolog (PSMC3-interacting protein) (Proteasome 26S ATPase subunit 3-interacting protein) (Tat-binding protein 1-interacting protein) (TBP-1-interacting protein)	Psmc3ip Hop2 Tbpip	FUNCTION: Plays an important role in meiotic recombination. Stimulates DMC1-mediated strand exchange required for pairing homologous chromosomes during meiosis. The complex PSMC3IP/MND1 binds DNA, stimulates the recombinase activity of DMC1 as well as DMC1 D-loop formation from double-strand DNA. This complex stabilizes presynaptic RAD51 and DMC1 filaments formed on single strand DNA to capture d…	3D-structure;Coiled coil;DNA recombination;DNA-binding;Meiosis;Nucleus;Reference proteome	homologous chromosome pairing at meiosis [GO:0007129]; meiotic joint molecule formation [GO:0000709]; meiotic strand invasion involved in reciprocal meiotic recombination [GO:0010774]; positive regulation of transcription by RNA polymerase II [GO:0045944]; reciprocal meiotic recombination [GO:0007131]	DNA binding domain binding [GO:0050692]; double-stranded DNA binding [GO:0003690]; nuclear androgen receptor binding [GO:0050681]; nuclear estrogen receptor binding [GO:0030331]; nuclear glucocorticoid receptor binding [GO:0035259]; nuclear receptor coactivator activity [GO:0030374]; nuclear thyroid hormone receptor binding [GO:0046966]; protein-containing complex binding [GO:0044877]; recombinas…	condensed nuclear chromosome [GO:0000794]; DNA recombinase auxiliary factor complex [GO:0120231]; nucleoplasm [GO:0005654]; nucleus [GO:0005634]		72.6835	68.27	55.5996	60.317	82.2935	78.7657	57.5838	35.2992	46.2247	NaN	NaN	76.7015	Proteasome&Peptidase
D6RGR5	Psmd1	D6RGR5_MOUSE	D6RGR5	Proteasome (prosome, macropain) 26S subunit, non-ATPase, 1	Psmd1		Proteomics identification;Reference proteome					NaN	147.088	106.566	100.583	72.2203	131.253	NaN	151.166	NaN	288.261	NaN	NaN	Proteasome&Peptidase
Q91YE6	Ipo9	E9QKZ2_MOUSE;IPO9_MOUSE	Q91YE6	Importin-9 (Imp9) (Importin-9a) (Imp9a) (Importin-9b) (Imp9b) (Ran-binding protein 9) (RanBP9)	Ipo9 Imp9 Ranbp9	FUNCTION: Nuclear transport receptor that mediates nuclear import of proteins, such as histones, proteasome and actin (PubMed:11493596, PubMed:11823430, PubMed:22323606). Serves as receptor for nuclear localization signals (NLS) in cargo substrates (PubMed:11493596, PubMed:11823430). Is thought to mediate docking of the importin/substrate complex to the nuclear pore complex (NPC) through binding …	Acetylation;Chaperone;Cytoplasm;Nucleus;Protein transport;Reference proteome;Transport	proteasome localization [GO:0031144]; protein import into nucleus [GO:0006606]; protein stabilization [GO:0050821]; ribosome biogenesis [GO:0042254]	histone binding [GO:0042393]; histone chaperone activity [GO:0140713]; nuclear import signal receptor activity [GO:0061608]; small GTPase binding [GO:0031267]	cytoplasm [GO:0005737]; cytosol [GO:0005829]; nuclear envelope [GO:0005635]		2172.15	2053.61	1778.12	1766.42	1942.62	1649.51	1929.72	1720.96	1787.04	1964.37	1892.34	1979.55	Proteasome&Peptidase
F6RJQ8	Sppl2a	F6RJQ8_MOUSE	F6RJQ8	Signal peptide peptidase like 2A	Sppl2a		Membrane;Proteomics identification;Reference proteome;Transmembrane;Transmembrane helix		aspartic-type endopeptidase activity [GO:0004190]	organelle membrane [GO:0031090]		NaN	18.2878	27.1687	28.2101	24.681	6.99722	18.5172	24.411	15.6957	NaN	15.0012	NaN	Proteasome&Peptidase
Q8VHH5	Agap3	F8VQE9_MOUSE;AGAP3_MOUSE	Q8VHH5	Arf-GAP with GTPase, ANK repeat and PH domain-containing protein 3 (AGAP-3) (CRAM-associated GTPase) (CRAG) (Centaurin-gamma-3) (Cnt-g3) (MR1-interacting protein) (MRIP-1)	Agap3 Centg3	FUNCTION: GTPase-activating protein for the ADP ribosylation factor family (Potential). GTPase which may be involved in the degradation of expanded polyglutamine proteins through the ubiquitin-proteasome pathway. {ECO:0000269|PubMed:16461359, ECO:0000305}.	Alternative splicing;ANK repeat;Cytoplasm;GTP-binding;GTPase activation;Metal-binding;Nucleotide-binding;Phosphoprotein;Reference proteome;Repeat;Zinc;Zinc-finger	activation of GTPase activity [GO:0090630]; cellular response to reactive oxygen species [GO:0034614]; proteasome-mediated ubiquitin-dependent protein catabolic process [GO:0043161]; protein import into nucleus [GO:0006606]	GTP binding [GO:0005525]; GTPase activator activity [GO:0005096]; GTPase activity [GO:0003924]; metal ion binding [GO:0046872]; polyubiquitin modification-dependent protein binding [GO:0031593]	cell periphery [GO:0071944]; cytoplasm [GO:0005737]; nucleus [GO:0005634]		187.337	153.743	152.276	169.777	160.431	118.395	160.901	159.68	123.197	174.431	201.153	204.442	Proteasome&Peptidase
P16675	Ctsa	G3X8T3_MOUSE;PPGB_MOUSE	P16675	Lysosomal protective protein (EC 3.4.16.5) (Carboxypeptidase C) (Carboxypeptidase L) (Cathepsin A) (Protective protein cathepsin A) (PPCA) (Protective protein for beta-galactosidase) [Cleaved into: Lysosomal protective protein 32 kDa chain; Lysosomal protective protein 20 kDa chain]	Ctsa Ppgb	FUNCTION: Protective protein appears to be essential for both the activity of beta-galactosidase and neuraminidase, it associates with these enzymes and exerts a protective function necessary for their stability and activity. This protein is also a carboxypeptidase and can deamidate tachykinins.	3D-structure;Carboxypeptidase;Disulfide bond;Glycoprotein;Hydrolase;Lysosome;Protease;Reference proteome;Signal;Zymogen	negative regulation of chaperone-mediated autophagy [GO:1904715]; proteolysis [GO:0006508]; regulation of protein stability [GO:0031647]	serine-type carboxypeptidase activity [GO:0004185]	intracellular membrane-bounded organelle [GO:0043231]; lysosome [GO:0005764]; mitochondrion [GO:0005739]		411.425	379.718	271.493	355.093	311.501	323.36	341.156	356.25	354.995	448.35	476.311	535.22	Proteasome&Peptidase
Q3UI33	Metap2	MAP2_MOUSE;Q3UI33_MOUSE	Q3UI33	Methionine aminopeptidase 2 (MAP 2) (MetAP 2) (EC 3.4.11.18) (Initiation factor 2-associated 67 kDa glycoprotein) (Peptidase M) (p67) (p67eIF2)	Metap2 METAP2	FUNCTION: Cotranslationally removes the N-terminal methionine from nascent proteins. The N-terminal methionine is often cleaved when the second residue in the primary sequence is small and uncharged (Met-Ala-, Cys, Gly, Pro, Ser, Thr, or Val). {ECO:0000256|HAMAP-Rule:MF_03175, ECO:0000256|RuleBase:RU003653}.; FUNCTION: Protects eukaryotic initiation factor EIF2S1 from translation-inhibiting phosp…	Aminopeptidase;Cytoplasm;Glycoprotein;Hydrolase;Metal-binding;Protease;Proteomics identification;Reference proteome	N-terminal protein amino acid modification [GO:0031365]; peptidyl-methionine modification [GO:0018206]; protein initiator methionine removal [GO:0070084]; protein processing [GO:0016485]	metal ion binding [GO:0046872]; metalloaminopeptidase activity [GO:0070006]	cytosol [GO:0005829]; plasma membrane [GO:0005886]		1099.12	1168.34	1102.14	1020.98	1077.67	992.602	1058.66	1085.56	1158.18	1106.22	1099.23	1052.72	Proteasome&Peptidase
O35309	Nmi	NMI_MOUSE	O35309	N-myc-interactor (Nmi) (N-myc and STAT interactor)	Nmi	FUNCTION: Acts as a signaling pathway regulator involved in innate immune system response (PubMed:23956435). In response to interleukin 2/IL2 and interferon IFN-gamma/IFNG, interacts with signal transducer and activator of transcription/STAT which activate the transcription of downstream genes involved in a multitude of signals for development and homeostasis (By similarity). Enhances the recruit…	Coiled coil;Cytoplasm;Immunity;Innate immunity;Isopeptide bond;Nucleus;Phosphoprotein;Reference proteome;Secreted;Ubl conjugation	innate immune response [GO:0045087]; macrophage activation involved in immune response [GO:0002281]; negative regulation of cell population proliferation [GO:0008285]; negative regulation of innate immune response [GO:0045824]; negative regulation of interferon-alpha production [GO:0032687]; negative regulation of interferon-beta production [GO:0032688]; negative regulation of NIK/NF-kappaB signa…	identical protein binding [GO:0042802]	cytoplasm [GO:0005737]; cytosol [GO:0005829]; extracellular space [GO:0005615]; membrane [GO:0016020]; nucleoplasm [GO:0005654]; nucleus [GO:0005634]		176.519	240.516	195.51	163.333	256.757	210.255	222.021	251.873	283.364	231.32	279.913	279.232	Proteasome&Peptidase
O55091	Impact	IMPCT_MOUSE	O55091	Protein IMPACT (Imprinted and ancient gene protein)	Impact	FUNCTION: Translational regulator that ensures constant high levels of translation upon a variety of stress conditions, such as amino acid starvation, UV-C irradiation, proteasome inhibitor treatment and glucose deprivation. Plays a role as a negative regulator of the EIF2AK4/GCN2 kinase activity; impairs GCN1-mediated EIF2AK4/GCN2 activation, and hence EIF2AK4/GCN2-mediated eIF-2-alpha phosphory…	Actin-binding;Cytoplasm;Differentiation;Neurogenesis;Phosphoprotein;Reference proteome;Repressor;Stress response;Translation regulation	cellular response to amino acid starvation [GO:0034198]; cellular response to leucine starvation [GO:1990253]; GCN2-mediated signaling [GO:0140469]; intracellular signal transduction [GO:0035556]; negative regulation of protein autophosphorylation [GO:0031953]; negative regulation of protein phosphorylation [GO:0001933]; negative regulation of transcription by RNA polymerase II [GO:0000122]; neur…	actin binding [GO:0003779]; protein sequestering activity [GO:0140311]; ribosome binding [GO:0043022]	cytosol [GO:0005829]; polysome [GO:0005844]		356.066	394.168	369.955	381.542	392.99	343.867	393.298	382.598	422.587	401.989	426.085	407.534	Proteasome&Peptidase
O89023	Tpp1	TPP1_MOUSE	O89023	Tripeptidyl-peptidase 1 (TPP-1) (EC 3.4.14.9) (Lysosomal pepstatin-insensitive protease) (LPIC) (Tripeptidyl aminopeptidase) (Tripeptidyl-peptidase I) (TPP-I)	Tpp1 Cln2	FUNCTION: Lysosomal serine protease with tripeptidyl-peptidase I activity (PubMed:28464005). May act as a non-specific lysosomal peptidase which generates tripeptides from the breakdown products produced by lysosomal proteinases (By similarity). Requires substrates with an unsubstituted N-terminus (By similarity). {ECO:0000250|UniProtKB:O14773, ECO:0000269|PubMed:28464005}.	Autocatalytic cleavage;Calcium;Disulfide bond;Glycoprotein;Hydrolase;Lysosome;Metal-binding;Protease;Reference proteome;Serine protease;Signal;Zymogen	bone resorption [GO:0045453]; central nervous system development [GO:0007417]; epithelial cell differentiation [GO:0030855]; lysosomal protein catabolic process [GO:1905146]; lysosome organization [GO:0007040]; nervous system development [GO:0007399]; neuromuscular process controlling balance [GO:0050885]; peptide catabolic process [GO:0043171]; protein catabolic process [GO:0030163]; protein loc…	endopeptidase activity [GO:0004175]; lysophosphatidic acid binding [GO:0035727]; metal ion binding [GO:0046872]; peptidase activity [GO:0008233]; peptide binding [GO:0042277]; serine-type endopeptidase activity [GO:0004252]; serine-type peptidase activity [GO:0008236]; sulfatide binding [GO:0120146]; tripeptidyl-peptidase activity [GO:0008240]	Golgi apparatus [GO:0005794]; lysosome [GO:0005764]; melanosome [GO:0042470]; membrane raft [GO:0045121]; mitochondrion [GO:0005739]; recycling endosome [GO:0055037]		649.87	524.872	450.965	495.851	454.193	416.926	509.524	521.67	548.19	590.327	466.456	505.72	Proteasome&Peptidase
P05132	Prkaca	KAPCA_MOUSE	P05132	cAMP-dependent protein kinase catalytic subunit alpha (PKA C-alpha) (EC 2.7.11.11)	Prkaca Pkaca	FUNCTION: Phosphorylates a large number of substrates in the cytoplasm and the nucleus (By similarity). Phosphorylates CDC25B, ABL1, NFKB1, CLDN3, PSMC5/RPT6, PJA2, RYR2, RORA, SOX9 and VASP (PubMed:10805756, PubMed:19223768). Regulates the abundance of compartmentalized pools of its regulatory subunits through phosphorylation of PJA2 which binds and ubiquitinates these subunits, leading to their…	3D-structure;Alternative splicing;ATP-binding;cAMP;Cell membrane;Cell projection;Cilium;Cytoplasm;Cytoplasmic vesicle;Flagellum;Kinase;Lipoprotein;Membrane;Mitochondrion;Myristate;Nucleotide-binding;Nucleus;Phosphoprotein;Reference proteome;Serine/threonine-protein kinase;Transferase	adenylate cyclase-activating G protein-coupled receptor signaling pathway [GO:0007189]; cellular response to cold [GO:0070417]; cellular response to glucagon stimulus [GO:0071377]; cellular response to glucose stimulus [GO:0071333]; cellular response to heat [GO:0034605]; cellular response to parathyroid hormone stimulus [GO:0071374]; mesoderm formation [GO:0001707]; modulation of chemical synapt…	AMP-activated protein kinase activity [GO:0004679]; ATP binding [GO:0005524]; cAMP-dependent protein kinase activity [GO:0004691]; magnesium ion binding [GO:0000287]; manganese ion binding [GO:0030145]; molecular function inhibitor activity [GO:0140678]; phosphatase activator activity [GO:0019211]; protein domain specific binding [GO:0019904]; protein kinase A regulatory subunit binding [GO:00342…	acrosomal vesicle [GO:0001669]; axoneme [GO:0005930]; cAMP-dependent protein kinase complex [GO:0005952]; centrosome [GO:0005813]; ciliary base [GO:0097546]; cytoplasm [GO:0005737]; cytosol [GO:0005829]; dendritic spine [GO:0043197]; glutamatergic synapse [GO:0098978]; Golgi apparatus [GO:0005794]; membrane [GO:0016020]; mitochondrion [GO:0005739]; neuromuscular junction [GO:0031594]; neuron proj…		346.885	316.972	359.23	337.593	381.833	345.206	343.187	372.03	361.54	447.988	446.107	446.202	Proteasome&Peptidase
P06803	Pim1	PIM1_MOUSE	P06803	Serine/threonine-protein kinase pim-1 (EC 2.7.11.1)	Pim1 Pim-1	FUNCTION: Proto-oncogene with serine/threonine kinase activity involved in cell survival and cell proliferation and thus providing a selective advantage in tumorigenesis. Exerts its oncogenic activity through: the regulation of MYC transcriptional activity, the regulation of cell cycle progression and by phosphorylation and inhibition of proapoptotic proteins (BAD, MAP3K5, FOXO3). Phosphorylation…	Alternative initiation;Apoptosis;ATP-binding;Cell cycle;Cell membrane;Cytoplasm;Kinase;Magnesium;Membrane;Metal-binding;Nucleotide-binding;Nucleus;Phosphoprotein;Proto-oncogene;Reference proteome;Serine/threonine-protein kinase;Transferase;Ubl conjugation	apoptotic process [GO:0006915]; cell cycle [GO:0007049]; cellular detoxification [GO:1990748]; negative regulation of apoptotic process [GO:0043066]; negative regulation of DNA-binding transcription factor activity [GO:0043433]; positive regulation of brown fat cell differentiation [GO:0090336]; positive regulation of cardiac muscle cell proliferation [GO:0060045]; positive regulation of cardiobl…	ATP binding [GO:0005524]; manganese ion binding [GO:0030145]; protein serine kinase activity [GO:0106310]; protein serine/threonine kinase activator activity [GO:0043539]; protein serine/threonine kinase activity [GO:0004674]; ribosomal small subunit binding [GO:0043024]	cytoplasm [GO:0005737]; cytosol [GO:0005829]; nucleolus [GO:0005730]; nucleoplasm [GO:0005654]; nucleus [GO:0005634]; plasma membrane [GO:0005886]		352.902	364.338	343.102	292.458	314.56	266.314	322.482	294.979	344.855	481.327	393.71	540.758	Proteasome&Peptidase
P0C7N9	Psmg4	PSMG4_MOUSE	P0C7N9	Proteasome assembly chaperone 4 (PAC-4) (mPAC4)	Psmg4 Pac4	FUNCTION: Chaperone protein which promotes assembly of the 20S proteasome. {ECO:0000269|PubMed:17707236}.	Chaperone;Reference proteome	proteasome assembly [GO:0043248]	protein-containing complex binding [GO:0044877]	protein-containing complex [GO:0032991]		1535.73	1544.94	1792.62	1677.63	1842.89	1639.96	1570.98	1446.15	1367.33	1402.2	1482.88	1476.95	Proteasome&Peptidase
P25799	Nfkb1	NFKB1_MOUSE	P25799	Nuclear factor NF-kappa-B p105 subunit (DNA-binding factor KBF1) (EBP-1) (NF-kappa-B1 p84/NF-kappa-B1 p98) (Nuclear factor of kappa light polypeptide gene enhancer in B-cells 1) [Cleaved into: Nuclear factor NF-kappa-B p50 subunit]	Nfkb1	FUNCTION: NF-kappa-B is a pleiotropic transcription factor present in almost all cell types and is the endpoint of a series of signal transduction events that are initiated by a vast array of stimuli related to many biological processes such as inflammation, immunity, differentiation, cell growth, tumorigenesis and apoptosis. NF-kappa-B is a homo- or heterodimeric complex formed by the Rel-like d…	3D-structure;Acetylation;Activator;Alternative splicing;ANK repeat;Apoptosis;Cytoplasm;Direct protein sequencing;DNA-binding;Hydroxylation;Isopeptide bond;Lipoprotein;Nucleus;Phosphoprotein;Reference proteome;Repeat;S-nitrosylation;Transcription;Transcription regulation;Ubl conjugation	apoptotic process [GO:0006915]; B cell receptor signaling pathway [GO:0050853]; cellular response to angiotensin [GO:1904385]; cellular response to brain-derived neurotrophic factor stimulus [GO:1990416]; cellular response to carbohydrate stimulus [GO:0071322]; cellular response to cytokine stimulus [GO:0071345]; cellular response to diterpene [GO:1904630]; cellular response to dsRNA [GO:0071359]…	actinin binding [GO:0042805]; chromatin binding [GO:0003682]; DNA binding [GO:0003677]; DNA-binding transcription activator activity, RNA polymerase II-specific [GO:0001228]; DNA-binding transcription factor activity [GO:0003700]; DNA-binding transcription factor activity, RNA polymerase II-specific [GO:0000981]; DNA-binding transcription repressor activity, RNA polymerase II-specific [GO:0001227…	chromatin [GO:0000785]; cytoplasm [GO:0005737]; cytosol [GO:0005829]; mitochondrion [GO:0005739]; neuron projection [GO:0043005]; NF-kappaB complex [GO:0071159]; nucleoplasm [GO:0005654]; nucleus [GO:0005634]; protein-containing complex [GO:0032991]		869.866	824.249	850.212	818.669	817.05	819.098	716.675	760.486	751.79	780.37	703.955	753.235	Proteasome&Peptidase
P35762	Cd81	CD81_MOUSE	P35762	CD81 antigen (26 kDa cell surface protein TAPA-1) (Target of the antiproliferative antibody 1) (CD antigen CD81)	Cd81 Tapa1	FUNCTION: Structural component of specialized membrane microdomains known as tetraspanin-enriched microdomains (TERMs), which act as platforms for receptor clustering and signaling. Essential for trafficking and compartmentalization of CD19 receptor on the cell surface of activated B cells (PubMed:23499492). Upon initial encounter with a microbial pathogen, enables the assembly of CD19-CR2 and B …	3D-structure;Adaptive immunity;Cell membrane;Direct protein sequencing;Disulfide bond;Immunity;Lipid-binding;Membrane;Reference proteome;Transmembrane;Transmembrane helix	CD4-positive, alpha-beta T cell costimulation [GO:0035783]; cellular response to low-density lipoprotein particle stimulus [GO:0071404]; humoral immune response mediated by circulating immunoglobulin [GO:0002455]; immunological synapse formation [GO:0001771]; macrophage fusion [GO:0034238]; myoblast fusion involved in skeletal muscle regeneration [GO:0014905]; osteoclast fusion [GO:0072675]; posi…	cholesterol binding [GO:0015485]; integrin binding [GO:0005178]; MHC class II protein binding [GO:0042289]; transferrin receptor binding [GO:1990459]; virus receptor activity [GO:0001618]	apical plasma membrane [GO:0016324]; basal plasma membrane [GO:0009925]; basolateral plasma membrane [GO:0016323]; extracellular exosome [GO:0070062]; immunological synapse [GO:0001772]; membrane [GO:0016020]; plasma membrane [GO:0005886]; tetraspanin-enriched microdomain [GO:0097197]; vesicle [GO:0031982]		846.617	764.733	682.646	681.398	639.65	629.325	551.489	595.237	508.467	476.262	498.447	579.264	Proteasome&Peptidase
P47811	Mapk14	MK14_MOUSE	P47811	Mitogen-activated protein kinase 14 (MAP kinase 14) (MAPK 14) (EC 2.7.11.24) (CRK1) (Mitogen-activated protein kinase p38 alpha) (MAP kinase p38 alpha)	Mapk14 Crk1 Csbp1 Csbp2	FUNCTION: Serine/threonine kinase which acts as an essential component of the MAP kinase signal transduction pathway. MAPK14 is one of the four p38 MAPKs which play an important role in the cascades of cellular responses evoked by extracellular stimuli such as pro-inflammatory cytokines or physical stress leading to direct activation of transcription factors. Accordingly, p38 MAPKs phosphorylate …	3D-structure;Acetylation;Alternative splicing;Apoptosis;ATP-binding;Cytoplasm;Direct protein sequencing;Kinase;Nucleotide-binding;Nucleus;Phosphoprotein;Reference proteome;Serine/threonine-protein kinase;Stress response;Transcription;Transcription regulation;Transferase;Ubl conjugation	angiogenesis [GO:0001525]; apoptotic process [GO:0006915]; bone development [GO:0060348]; cartilage condensation [GO:0001502]; cell morphogenesis [GO:0000902]; cellular response to ionizing radiation [GO:0071479]; cellular response to lipopolysaccharide [GO:0071222]; cellular response to lipoteichoic acid [GO:0071223]; cellular response to tumor necrosis factor [GO:0071356]; cellular response to …	ATP binding [GO:0005524]; enzyme binding [GO:0019899]; kinase activity [GO:0016301]; MAP kinase activity [GO:0004707]; mitogen-activated protein kinase p38 binding [GO:0048273]; NFAT protein binding [GO:0051525]; protein kinase activity [GO:0004672]; protein phosphatase binding [GO:0019903]; protein serine kinase activity [GO:0106310]; protein serine/threonine kinase activity [GO:0004674]	cytoplasm [GO:0005737]; cytosol [GO:0005829]; glutamatergic synapse [GO:0098978]; mitochondrion [GO:0005739]; nuclear speck [GO:0016607]; nucleoplasm [GO:0005654]; nucleus [GO:0005634]; spindle pole [GO:0000922]		407.458	391.454	354.317	418.546	405.25	437.007	396.401	402.893	392.506	501.19	430.842	490.589	Proteasome&Peptidase
P51944	Ccnf	CCNF_MOUSE	P51944	Cyclin-F	Ccnf	FUNCTION: Substrate recognition component of a SCF (SKP1-CUL1-F-box protein) E3 ubiquitin-protein ligase complex which mediates the ubiquitination and subsequent proteasomal degradation of target proteins (By similarity). The SCF(CCNF) E3 ubiquitin-protein ligase complex is an integral component of the ubiquitin proteasome system (UPS) and links proteasome degradation to the cell cycle (By simila…	Alternative splicing;Cell cycle;Cell division;Cyclin;Cytoplasm;Cytoskeleton;Mitosis;Nucleus;Phosphoprotein;Reference proteome;Ubl conjugation;Ubl conjugation pathway	cell division [GO:0051301]; mitotic cell cycle phase transition [GO:0044772]; negative regulation of centrosome duplication [GO:0010826]; placenta development [GO:0001890]; protein ubiquitination [GO:0016567]; re-entry into mitotic cell cycle [GO:0000320]; regulation of cell cycle [GO:0051726]; regulation of cyclin-dependent protein serine/threonine kinase activity [GO:0000079]; SCF-dependent pro…	anaphase-promoting complex binding [GO:0010997]; cyclin-dependent protein serine/threonine kinase regulator activity [GO:0016538]	cell junction [GO:0030054]; centriole [GO:0005814]; centrosome [GO:0005813]; cyclin-dependent protein kinase holoenzyme complex [GO:0000307]; cytoplasm [GO:0005737]; nucleus [GO:0005634]; perinuclear region of cytoplasm [GO:0048471]; SCF ubiquitin ligase complex [GO:0019005]		191.457	152.031	152.292	135.466	146.283	149.037	126.617	146.127	169.186	101.711	315.668	138.768	Proteasome&Peptidase
P60229	Eif3e	EIF3E_MOUSE	P60229	Eukaryotic translation initiation factor 3 subunit E (eIF3e) (Eukaryotic translation initiation factor 3 subunit 6) (MMTV integration site 6) (Mammary tumor-associated protein INT-6) (Viral integration site protein INT-6) (eIF-3 p48)	Eif3e Eif3s6 Int6	FUNCTION: Component of the eukaryotic translation initiation factor 3 (eIF-3) complex, which is required for several steps in the initiation of protein synthesis. The eIF-3 complex associates with the 40S ribosome and facilitates the recruitment of eIF-1, eIF-1A, eIF-2:GTP:methionyl-tRNAi and eIF-5 to form the 43S pre-initiation complex (43S PIC). The eIF-3 complex stimulates mRNA recruitment to …	Acetylation;Cytoplasm;Initiation factor;Nucleus;Phosphoprotein;Protein biosynthesis;Reference proteome	formation of cytoplasmic translation initiation complex [GO:0001732]; intracellular calcium ion homeostasis [GO:0006874]; nuclear-transcribed mRNA catabolic process, nonsense-mediated decay [GO:0000184]; positive regulation of intracellular protein transport [GO:0090316]; positive regulation of mRNA binding [GO:1902416]; positive regulation of translation [GO:0045727]; translational initiation [G…	translation initiation factor activity [GO:0003743]; transmembrane transporter binding [GO:0044325]	cytoplasm [GO:0005737]; cytosol [GO:0005829]; eukaryotic 43S preinitiation complex [GO:0016282]; eukaryotic 48S preinitiation complex [GO:0033290]; eukaryotic translation initiation factor 3 complex [GO:0005852]; eukaryotic translation initiation factor 3 complex, eIF3e [GO:0071540]; nucleus [GO:0005634]; PML body [GO:0016605]; postsynaptic density [GO:0014069]		3419.04	3196.74	3287.61	3262.41	3095.23	3014.5	2892.04	3206.35	2982.06	3074.09	3113.46	2869.84	Proteasome&Peptidase
P60670	Nploc4	NPL4_MOUSE	P60670	Nuclear protein localization protein 4 homolog (Protein NPL4)	Nploc4 Kiaa1499 Npl4	FUNCTION: The ternary complex containing UFD1, VCP and NPLOC4 binds ubiquitinated proteins and is necessary for the export of misfolded proteins from the ER to the cytoplasm, where they are degraded by the proteasome. The NPLOC4-UFD1-VCP complex regulates spindle disassembly at the end of mitosis and is necessary for the formation of a closed nuclear envelope (By similarity). Acts as a negative r…	3D-structure;Acetylation;Alternative splicing;Chaperone;Cytoplasm;Endoplasmic reticulum;Metal-binding;Nucleus;Reference proteome;Zinc;Zinc-finger	Golgi organization [GO:0007030]; negative regulation of RIG-I signaling pathway [GO:0039536]; negative regulation of type I interferon production [GO:0032480]; retrograde protein transport, ER to cytosol [GO:0030970]; ubiquitin-dependent ERAD pathway [GO:0030433]; ubiquitin-dependent protein catabolic process [GO:0006511]	ATPase binding [GO:0051117]; K48-linked polyubiquitin modification-dependent protein binding [GO:0036435]; K63-linked polyubiquitin modification-dependent protein binding [GO:0070530]; metal ion binding [GO:0046872]; protein-containing complex binding [GO:0044877]; ubiquitin binding [GO:0043130]; ubiquitin protein ligase binding [GO:0031625]	cytosol [GO:0005829]; endoplasmic reticulum [GO:0005783]; nuclear outer membrane-endoplasmic reticulum membrane network [GO:0042175]; nucleus [GO:0005634]; UFD1-NPL4 complex [GO:0036501]; VCP-NPL4-UFD1 AAA ATPase complex [GO:0034098]	PATHWAY: Protein degradation; proteasomal ubiquitin-dependent pathway.	780.798	677.647	742.218	817.764	736.391	748.342	645.152	633.278	659.585	783.395	727.233	733.837	Proteasome&Peptidase
P61290	Psme3	PSME3_MOUSE	P61290	Proteasome activator complex subunit 3 (11S regulator complex subunit gamma) (REG-gamma) (Activator of multicatalytic protease subunit 3) (Ki nuclear autoantigen) (Proteasome activator 28 subunit gamma) (PA28g) (PA28gamma)	Psme3	FUNCTION: Subunit of the 11S REG-gamma (also called PA28-gamma) proteasome regulator, a doughnut-shaped homoheptamer which associates with the proteasome. 11S REG-gamma activates the trypsin-like catalytic subunit of the proteasome but inhibits the chymotrypsin-like and postglutamyl-preferring (PGPH) subunits. Facilitates the MDM2-p53/TP53 interaction which promotes ubiquitination- and MDM2-depen…	Acetylation;Apoptosis;Cell cycle;Cytoplasm;Nucleus;Phosphoprotein;Proteasome;Reference proteome	apoptotic process [GO:0006915]; cell cycle [GO:0007049]; negative regulation of extrinsic apoptotic signaling pathway [GO:2001237]; positive regulation of endopeptidase activity [GO:0010950]; regulation of G1/S transition of mitotic cell cycle [GO:2000045]; regulation of proteasomal protein catabolic process [GO:0061136]	endopeptidase activator activity [GO:0061133]; identical protein binding [GO:0042802]; MDM2/MDM4 family protein binding [GO:0097371]; p53 binding [GO:0002039]	cytoplasm [GO:0005737]; cytosol [GO:0005829]; nucleoplasm [GO:0005654]; proteasome activator complex [GO:0008537]		1208.13	1104.02	1187.8	1127.31	1120.23	1075.59	1155.94	1124.84	1073.55	1115.29	1010.58	1029.49	Proteasome&Peptidase
P68040	Rack1	RACK1_MOUSE	P68040	Small ribosomal subunit protein RACK1 (12-3) (Guanine nucleotide-binding protein subunit beta-2-like 1) (Receptor for activated C kinase) (Receptor of activated protein C kinase 1) (Receptor of activated protein kinase C 1) (p205) [Cleaved into: Small ribosomal subunit protein RACK1, N-terminally processed (Guanine nucleotide-binding protein subunit beta-2-like 1, N-terminally processed) (Recepto…	Rack1 Gnb2-rs1 Gnb2l1	FUNCTION: Scaffolding protein involved in the recruitment, assembly and/or regulation of a variety of signaling molecules (PubMed:7968370, PubMed:18258429, PubMed:20093473, PubMed:21262816, PubMed:33505023, PubMed:36517592). Interacts with a wide variety of proteins and plays a role in many cellular processes (PubMed:7968370, PubMed:18258429, PubMed:20093473, PubMed:21262816, PubMed:36517592). Co…	3D-structure;Acetylation;Apoptosis;Biological rhythms;Cell cycle;Cell membrane;Cell projection;Cytoplasm;Developmental protein;Direct protein sequencing;Gastrulation;Growth regulation;Membrane;Nucleus;Phosphoprotein;Reference proteome;Repeat;Ribonucleoprotein;Ribosomal protein;Translation regulation;WD repeat	activation of cysteine-type endopeptidase activity involved in apoptotic process [GO:0006919]; cell cycle [GO:0007049]; cellular response to glucose stimulus [GO:0071333]; cellular response to growth factor stimulus [GO:0071363]; gastrulation [GO:0007369]; intracellular signal transduction [GO:0035556]; negative regulation of cell growth [GO:0030308]; negative regulation of gene expression [GO:00…	BH3 domain binding [GO:0051434]; cyclin binding [GO:0030332]; cysteine-type endopeptidase activator activity involved in apoptotic process [GO:0008656]; enzyme binding [GO:0019899]; ion channel inhibitor activity [GO:0008200]; protein homodimerization activity [GO:0042803]; protein kinase C binding [GO:0005080]; protein phosphatase binding [GO:0019903]; protein tyrosine kinase inhibitor activity …	cell body [GO:0044297]; cytoplasm [GO:0005737]; cytosol [GO:0005829]; dendrite [GO:0030425]; IRE1-RACK1-PP2A complex [GO:1990630]; midbody [GO:0030496]; mitochondrion [GO:0005739]; neuron projection [GO:0043005]; neuronal cell body [GO:0043025]; nucleoplasm [GO:0005654]; nucleus [GO:0005634]; perikaryon [GO:0043204]; perinuclear region of cytoplasm [GO:0048471]; phagocytic cup [GO:0001891]; small…		5924.63	5446.31	5631.61	5228	5153.93	5045.89	5502.91	4999.14	5559.63	5478.34	5256.87	5206.74	Proteasome&Peptidase
P97821	Ctsc	CATC_MOUSE	P97821	Dipeptidyl peptidase 1 (EC 3.4.14.1) (Cathepsin C) (Cathepsin J) (Dipeptidyl peptidase I) (DPP-I) (DPPI) (Dipeptidyl transferase) [Cleaved into: Dipeptidyl peptidase 1 exclusion domain chain (Dipeptidyl peptidase I exclusion domain chain); Dipeptidyl peptidase 1 heavy chain (Dipeptidyl peptidase I heavy chain); Dipeptidyl peptidase 1 light chain (Dipeptidyl peptidase I light chain)]	Ctsc	FUNCTION: Thiol protease. Has dipeptidylpeptidase activity. Active against a broad range of dipeptide substrates composed of both polar and hydrophobic amino acids. Proline cannot occupy the P1 position and arginine cannot occupy the P2 position of the substrate. Can act as both an exopeptidase and endopeptidase. Activates serine proteases such as elastase, cathepsin G and granzymes A and B. {ECO…	Chloride;Disulfide bond;Glycoprotein;Hydrolase;Lysosome;Protease;Reference proteome;Signal;Thiol protease;Zymogen	aging [GO:0007568]; negative regulation of myelination [GO:0031642]; positive regulation of apoptotic signaling pathway [GO:2001235]; positive regulation of microglial cell activation [GO:1903980]; positive regulation of proteolysis involved in protein catabolic process [GO:1903052]; proteolysis [GO:0006508]; proteolysis involved in protein catabolic process [GO:0051603]; response to organic subs…	chloride ion binding [GO:0031404]; cysteine-type endopeptidase activity [GO:0004197]; cysteine-type peptidase activity [GO:0008234]; dipeptidyl-peptidase activity [GO:0008239]; identical protein binding [GO:0042802]; peptidase activator activity involved in apoptotic process [GO:0016505]; phosphatase binding [GO:0019902]; protein self-association [GO:0043621]; protein-folding chaperone binding [G…	centrosome [GO:0005813]; collagen-containing extracellular matrix [GO:0062023]; cytoplasm [GO:0005737]; endoplasmic reticulum [GO:0005783]; extracellular space [GO:0005615]; Golgi apparatus [GO:0005794]; intracellular membrane-bounded organelle [GO:0043231]; lysosome [GO:0005764]; nucleoplasm [GO:0005654]		390.888	311.949	348.018	349.75	379.497	323.749	275.636	304.922	312.292	399.843	280.197	265.577	Proteasome&Peptidase
Q07832	Plk1	PLK1_MOUSE	Q07832	Serine/threonine-protein kinase PLK1 (EC 2.7.11.21) (Polo-like kinase 1) (PLK-1) (Serine/threonine-protein kinase 13) (STPK13)	Plk1 Plk	FUNCTION: Serine/threonine-protein kinase that performs several important functions throughout M phase of the cell cycle, including the regulation of centrosome maturation and spindle assembly, the removal of cohesins from chromosome arms, the inactivation of anaphase-promoting complex/cyclosome (APC/C) inhibitors, and the regulation of mitotic exit and cytokinesis. Polo-like kinase proteins acts…	3D-structure;ATP-binding;Cell cycle;Cell division;Centromere;Chromosome;Cytoplasm;Cytoskeleton;Isopeptide bond;Kinase;Kinetochore;Mitosis;Nucleotide-binding;Nucleus;Phosphoprotein;Reference proteome;Repeat;Serine/threonine-protein kinase;Transferase;Ubl conjugation	centrosome cycle [GO:0007098]; establishment of mitotic spindle orientation [GO:0000132]; establishment of protein localization [GO:0045184]; female meiosis chromosome segregation [GO:0016321]; G2/M transition of mitotic cell cycle [GO:0000086]; homologous chromosome segregation [GO:0045143]; microtubule bundle formation [GO:0001578]; mitotic cell cycle [GO:0000278]; mitotic cytokinesis [GO:00002…	anaphase-promoting complex binding [GO:0010997]; ATP binding [GO:0005524]; identical protein binding [GO:0042802]; magnesium ion binding [GO:0000287]; microtubule binding [GO:0008017]; protein kinase activity [GO:0004672]; protein kinase binding [GO:0019901]; protein serine kinase activity [GO:0106310]; protein serine/threonine kinase activity [GO:0004674]	centriolar satellite [GO:0034451]; centriole [GO:0005814]; centrosome [GO:0005813]; chromatin [GO:0000785]; chromosome, centromeric region [GO:0000775]; condensed chromosome, centromeric region [GO:0000779]; cytoplasm [GO:0005737]; kinetochore [GO:0000776]; microtubule cytoskeleton [GO:0015630]; midbody [GO:0030496]; mitotic spindle pole [GO:0097431]; nucleus [GO:0005634]; outer kinetochore [GO:0…		394.042	337.987	354.746	387.423	345.451	350.321	305.631	342.568	379.404	430.797	373.84	386.353	Proteasome&Peptidase
Q11011	Npepps	PSA_MOUSE	Q11011	Puromycin-sensitive aminopeptidase (PSA) (EC 3.4.11.14) (Cytosol alanyl aminopeptidase) (AAP-S)	Npepps Psa	FUNCTION: Aminopeptidase with broad substrate specificity for several peptides. Involved in proteolytic events essential for cell growth and viability. May act as regulator of neuropeptide activity. Plays a role in the antigen-processing pathway for MHC class I molecules. Involved in the N-terminal trimming of cytotoxic T-cell epitope precursors. Digests the poly-Q peptides found in many cellular…	Aminopeptidase;Cytoplasm;Hydrolase;Metal-binding;Metalloprotease;Nitration;Nucleus;Protease;Reference proteome;Zinc	cellular response to hypoxia [GO:0071456]; peptide catabolic process [GO:0043171]; proteolysis [GO:0006508]	aminopeptidase activity [GO:0004177]; metalloaminopeptidase activity [GO:0070006]; peptide binding [GO:0042277]; zinc ion binding [GO:0008270]	cytoplasm [GO:0005737]; cytosol [GO:0005829]; nucleus [GO:0005634]		589.148	592.072	605.007	684.6	653.564	598.176	631.747	635.135	652.24	700.96	662.742	625.979	Proteasome&Peptidase
Q11136	Pepd	PEPD_MOUSE	Q11136	Xaa-Pro dipeptidase (X-Pro dipeptidase) (EC 3.4.13.9) (Imidodipeptidase) (Peptidase 4) (Peptidase D) (Proline dipeptidase) (Prolidase)	Pepd Pep4	FUNCTION: Dipeptidase that catalyzes the hydrolysis of dipeptides with a prolyl (Xaa-Pro) or hydroxyprolyl residue in the C-terminal position. The preferred dipeptide substrate is Gly-Pro, but other Xaa-Pro dipeptides, such as Ala-Pro, Met-Pro, Phe-Pro, Val-Pro and Leu-Pro, can be cleaved. Plays an important role in collagen metabolism because the high level of iminoacids in collagen. {ECO:000025…	Acetylation;Collagen degradation;Dipeptidase;Hydrolase;Manganese;Metal-binding;Metalloprotease;Phosphoprotein;Protease;Reference proteome	collagen catabolic process [GO:0030574]; negative regulation of programmed cell death [GO:0043069]; proteolysis [GO:0006508]	manganese ion binding [GO:0030145]; metalloaminopeptidase activity [GO:0070006]; peptidase activity [GO:0008233]; proline dipeptidase activity [GO:0102009]			1092.69	1199.3	1127.78	952.788	1036.95	1118.21	1032.8	910.612	1024.56	862.762	1024.1	948.53	Proteasome&Peptidase
Q9Z2W0	Dnpep	Q3TVK3_MOUSE;DNPEP_MOUSE	Q9Z2W0	Aspartyl aminopeptidase (EC 3.4.11.21)	Dnpep	FUNCTION: Aminopeptidase with specificity towards an acidic amino acid at the N-terminus. Likely to play an important role in intracellular protein and peptide metabolism (By similarity). {ECO:0000250}.	Aminopeptidase;Cytoplasm;Hydrolase;Metal-binding;Metalloprotease;Phosphoprotein;Protease;Reference proteome;Zinc	proteolysis [GO:0006508]	aminopeptidase activity [GO:0004177]; identical protein binding [GO:0042802]; metallopeptidase activity [GO:0008237]; zinc ion binding [GO:0008270]	cytosol [GO:0005829]		1502.79	1480.19	1409.9	1519.16	1425.78	1416.78	1509.38	1442.11	1501.53	1582.61	1437.7	1472.76	Proteasome&Peptidase
Q9Z1R2	Bag6	Q3UF95_MOUSE;BAG6_MOUSE	Q9Z1R2	Large proline-rich protein BAG6 (BAG family molecular chaperone regulator 6) (BCL2-associated athanogene 6) (BAG-6) (HLA-B-associated transcript 3) (Protein Scythe)	Bag6 Bat3	FUNCTION: ATP-independent molecular chaperone preventing the aggregation of misfolded and hydrophobic patches-containing proteins (PubMed:18056262, PubMed:18678708, PubMed:20713601). Functions as part of a cytosolic protein quality control complex, the BAG6/BAT3 complex, which maintains these client proteins in a soluble state and participates in their proper delivery to the endoplasmic reticulum…	Acetylation;Apoptosis;Chaperone;Chromatin regulator;Cytoplasm;Differentiation;Immunity;Nucleus;Phosphoprotein;Reference proteome;Repeat;Secreted;Spermatogenesis;Transport	antigen processing and presentation of peptide antigen via MHC class I [GO:0002474]; apoptotic process [GO:0006915]; brain development [GO:0007420]; cell differentiation [GO:0030154]; chromatin organization [GO:0006325]; endoplasmic reticulum stress-induced pre-emptive quality control [GO:0061857]; ER-associated misfolded protein catabolic process [GO:0071712]; immune response-activating cell sur…	Hsp70 protein binding [GO:0030544]; identical protein binding [GO:0042802]; misfolded protein binding [GO:0051787]; polyubiquitin modification-dependent protein binding [GO:0031593]; proteasome binding [GO:0070628]; ribosome binding [GO:0043022]; signaling receptor binding [GO:0005102]; ubiquitin protein ligase binding [GO:0031625]; ubiquitin-specific protease binding [GO:1990381]	BAT3 complex [GO:0071818]; cytoplasm [GO:0005737]; cytosol [GO:0005829]; extracellular exosome [GO:0070062]; intracellular membrane-bounded organelle [GO:0043231]; membrane [GO:0016020]; nucleoplasm [GO:0005654]; nucleus [GO:0005634]		1950.96	2138.22	1881.03	1984.09	1895.65	1946.83	1953.71	1797.43	1885.32	1883.12	1992.62	1994.95	Antigen processing
Q923E4	Sirt1	Q3UNI1_MOUSE;SIR1_MOUSE	Q923E4	NAD-dependent protein deacetylase sirtuin-1 (EC 2.3.1.286) (NAD-dependent protein deacylase sirtuin-1) (EC 2.3.1.-) (Regulatory protein SIR2 homolog 1) (SIR2-like protein 1) (SIR2alpha) (Sir2) (mSIR2a) [Cleaved into: SirtT1 75 kDa fragment (75SirT1)]	Sirt1 Sir2l1	FUNCTION: NAD-dependent protein deacetylase that links transcriptional regulation directly to intracellular energetics and participates in the coordination of several separated cellular functions such as cell cycle, response to DNA damage, metabolism, apoptosis and autophagy (PubMed:11250901, PubMed:11672522, PubMed:12651913, PubMed:12887892, PubMed:12960381, PubMed:15175761, PubMed:15220471, Pub…	Acetylation;Alternative splicing;Apoptosis;Biological rhythms;Cytoplasm;Developmental protein;Differentiation;Metal-binding;Mitochondrion;Myogenesis;NAD;Nucleus;Phosphoprotein;Reference proteome;S-nitrosylation;Transcription;Transcription regulation;Transferase;Zinc	angiogenesis [GO:0001525]; behavioral response to starvation [GO:0042595]; cellular response to amyloid-beta [GO:1904646]; cellular response to glucose starvation [GO:0042149]; cellular response to hydrogen peroxide [GO:0070301]; cellular response to hypoxia [GO:0071456]; cellular response to ionizing radiation [GO:0071479]; cellular response to leukemia inhibitory factor [GO:1990830]; cellular r…	bHLH transcription factor binding [GO:0043425]; deacetylase activity [GO:0019213]; DNA-binding transcription factor binding [GO:0140297]; enzyme activator activity [GO:0008047]; enzyme binding [GO:0019899]; enzyme inhibitor activity [GO:0004857]; histone binding [GO:0042393]; histone deacetylase activity [GO:0004407]; HLH domain binding [GO:0043398]; identical protein binding [GO:0042802]; kerati…	axon [GO:0030424]; chromatin [GO:0000785]; chromatin silencing complex [GO:0005677]; cytoplasm [GO:0005737]; cytosol [GO:0005829]; eNoSc complex [GO:0061773]; ESC/E(Z) complex [GO:0035098]; euchromatin [GO:0000791]; fibrillar center [GO:0001650]; growth cone [GO:0030426]; heterochromatin [GO:0000792]; mitochondrion [GO:0005739]; nuclear envelope [GO:0005635]; nuclear inner membrane [GO:0005637]; …		1021.22	1076.58	1069.97	695.641	704.786	740.781	744.38	791.924	774.314	865.006	881.957	904.06	Proteasome&Peptidase
Q3UVK0	Ermp1	ERMP1_MOUSE	Q3UVK0	Endoplasmic reticulum metallopeptidase 1 (EC 3.4.-.-) (Felix-ina)	Ermp1 D19Wsu12e Fxna Kiaa1815	FUNCTION: Within the ovary, required for the organization of somatic cells and oocytes into discrete follicular structures. {ECO:0000250|UniProtKB:Q6UPR8}.	Acetylation;Alternative splicing;Disulfide bond;Endoplasmic reticulum;Glycoprotein;Hydrolase;Membrane;Metal-binding;Metalloprotease;Protease;Reference proteome;Transmembrane;Transmembrane helix;Zinc	cellular response to oxidative stress [GO:0034599]; endoplasmic reticulum unfolded protein response [GO:0030968]; ovarian follicle development [GO:0001541]; proteolysis [GO:0006508]	metal ion binding [GO:0046872]; metalloexopeptidase activity [GO:0008235]	endoplasmic reticulum [GO:0005783]; endoplasmic reticulum membrane [GO:0005789]		959.283	830.9	994.768	1060.98	1073.15	937.026	915.334	988.037	934.616	1005.1	1172.5	984.755	Proteasome&Peptidase
Q78JE5	Fbxo22	Q3V492_MOUSE;FBX22_MOUSE	Q78JE5	F-box only protein 22	Fbxo22 Fbx22	FUNCTION: Substrate-recognition component of the SCF (SKP1-CUL1-F-box protein)-type E3 ubiquitin ligase complex. Promotes the proteasome-dependent degradation of key sarcomeric proteins, such as alpha-actinin (ACTN2) and filamin-C (FLNC), essential for maintenance of normal contractile function. {ECO:0000269|PubMed:22972877}.	Acetylation;Cytoplasm;Reference proteome;Ubl conjugation pathway	cellular response to starvation [GO:0009267]; nucleocytoplasmic transport [GO:0006913]; positive regulation of proteasomal ubiquitin-dependent protein catabolic process [GO:0032436]; positive regulation of ubiquitin-dependent protein catabolic process [GO:2000060]; proteasome-mediated ubiquitin-dependent protein catabolic process [GO:0043161]; protein polyubiquitination [GO:0000209]; regulation o…		cytoplasm [GO:0005737]; nucleus [GO:0005634]; Z disc [GO:0030018]		192.651	157.311	239.961	259.364	225.78	189.648	107.398	134.249	185.324	173.614	197.67	231.566	Proteasome&Peptidase
Q5SRY7	Fbxw11	FBW1B_MOUSE	Q5SRY7	F-box/WD repeat-containing protein 11 (F-box and WD repeats protein beta-TrCP2) (F-box/WD repeat-containing protein 1B) (Homologous to Slimb protein) (HOS)	Fbxw11 Btrcp2 Fbw1b Fbxw1b	FUNCTION: Substrate recognition component of a SCF (SKP1-CUL1-F-box protein) E3 ubiquitin-protein ligase complex which mediates the ubiquitination and subsequent proteasomal degradation of target proteins (PubMed:11896578). Probably recognizes and binds to phosphorylated target proteins: the interaction with substrates requires the phosphorylation of the two serine residues in the substrates' des…	Alternative splicing;Biological rhythms;Cell cycle;Cytoplasm;Nucleus;Reference proteome;Repeat;Ubl conjugation pathway;WD repeat;Wnt signaling pathway	brain morphogenesis [GO:0048854]; establishment of mitotic spindle orientation [GO:0000132]; germ cell development [GO:0007281]; microtubule organizing center organization [GO:0031023]; negative regulation of DNA-templated transcription [GO:0045892]; negative regulation of NIK/NF-kappaB signaling [GO:1901223]; nuclear migration [GO:0007097]; positive regulation of circadian rhythm [GO:0042753]; p…	dynein complex binding [GO:0070840]; microtubule plus-end binding [GO:0051010]; protein dimerization activity [GO:0046983]; ubiquitin protein ligase activity [GO:0061630]; ubiquitin-protein transferase activity [GO:0004842]	axon cytoplasm [GO:1904115]; centrosome [GO:0005813]; cytoplasm [GO:0005737]; cytoplasmic microtubule [GO:0005881]; cytosol [GO:0005829]; kinetochore [GO:0000776]; microtubule associated complex [GO:0005875]; neuron projection [GO:0043005]; neuronal cell body [GO:0043025]; nuclear envelope [GO:0005635]; nucleus [GO:0005634]; SCF ubiquitin ligase complex [GO:0019005]	PATHWAY: Protein modification; protein ubiquitination. {ECO:0000269|PubMed:11896578}.	207.2	144.79	241.226	246.202	224.082	227.559	125.538	145.604	95.6914	153.512	113.438	163.081	Proteasome&Peptidase
Q61382	Traf4	TRAF4_MOUSE	Q61382	TNF receptor-associated factor 4 (EC 2.3.2.27) (Cysteine-rich motif associated to RING and Traf domains protein 1)	Traf4 Cart1	FUNCTION: Adapter protein with E3 ligase activity that is involved in many diverse biological processes including cell proliferation, migration, differentiation, DNA repair, platelet activation or apoptosis. Promotes EGFR-mediated signaling by facilitating the dimerization of EGFR and downstream AKT activation thereby promoting cell proliferation. Ubiquitinates SMURF2 through 'Lys-48'-linked ubiq…	Apoptosis;Cell junction;Cell membrane;Coiled coil;Cytoplasm;Cytoskeleton;Developmental protein;Immunity;Innate immunity;Isopeptide bond;Membrane;Metal-binding;Nucleus;Phosphoprotein;Reference proteome;Repeat;Tight junction;Transferase;Ubl conjugation;Ubl conjugation pathway;Zinc;Zinc-finger	activation of NF-kappaB-inducing kinase activity [GO:0007250]; apoptotic process [GO:0006915]; innate immune response [GO:0045087]; positive regulation of JNK cascade [GO:0046330]; positive regulation of protein kinase activity [GO:0045860]; proteasome-mediated ubiquitin-dependent protein catabolic process [GO:0043161]; protein K63-linked ubiquitination [GO:0070534]; regulation of apoptotic proce…	identical protein binding [GO:0042802]; protein kinase binding [GO:0019901]; thioesterase binding [GO:0031996]; transferase activity [GO:0016740]; tumor necrosis factor receptor binding [GO:0005164]; ubiquitin protein ligase binding [GO:0031625]; WW domain binding [GO:0050699]; zinc ion binding [GO:0008270]	bicellular tight junction [GO:0005923]; cytoplasm [GO:0005737]; cytoskeleton [GO:0005856]; cytosol [GO:0005829]; fibrillar center [GO:0001650]; nucleoplasm [GO:0005654]; nucleus [GO:0005634]; perinuclear region of cytoplasm [GO:0048471]; plasma membrane [GO:0005886]	PATHWAY: Protein degradation; proteasomal ubiquitin-dependent pathway. {ECO:0000250|UniProtKB:Q9BUZ4}.	12.7183	16.8408	17.1457	19.56	13.6692	23.085	10.0576	15.0149	17.4055	11.6087	6.09191	10.6735	Proteasome&Peptidase
Q64514	Tpp2	TPP2_MOUSE	Q64514	Tripeptidyl-peptidase 2 (TPP-2) (EC 3.4.14.10) (Tripeptidyl aminopeptidase) (Tripeptidyl-peptidase II) (TPP-II)	Tpp2	FUNCTION: Cytosolic tripeptidyl-peptidase that releases N-terminal tripeptides from polypeptides and is a component of the proteolytic cascade acting downstream of the 26S proteasome in the ubiquitin-proteasome pathway. It plays an important role in intracellular amino acid homeostasis (By similarity). Stimulates adipogenesis (PubMed:17932511). {ECO:0000250|UniProtKB:P29144, ECO:0000269|PubMed:17…	Acetylation;Alternative splicing;Aminopeptidase;Cytoplasm;Hydrolase;Nucleus;Phosphoprotein;Protease;Reference proteome;Serine protease	intracellular amino acid homeostasis [GO:0080144]; protein catabolic process [GO:0030163]; proteolysis [GO:0006508]	aminopeptidase activity [GO:0004177]; identical protein binding [GO:0042802]; peptide binding [GO:0042277]; serine-type endopeptidase activity [GO:0004252]; tripeptidyl-peptidase activity [GO:0008240]	cytosol [GO:0005829]; endoplasmic reticulum [GO:0005783]; nuclear body [GO:0016604]; nucleoplasm [GO:0005654]		4399.6	4237.94	4234.93	4222.11	4464.93	4122.06	4300.44	4144.3	4316.37	4065.87	4107.47	4163.83	Proteasome&Peptidase
Q6NSR8	Npepl1	PEPL1_MOUSE	Q6NSR8	Probable aminopeptidase NPEPL1 (EC 3.4.11.-) (Aminopeptidase-like 1)	Npepl1	FUNCTION: Probably catalyzes the removal of unsubstituted N-terminal amino acids from various peptides. {ECO:0000250}.	Aminopeptidase;Hydrolase;Manganese;Metal-binding;Protease;Reference proteome;Zinc	proteolysis [GO:0006508]	manganese ion binding [GO:0030145]; metalloaminopeptidase activity [GO:0070006]; peptidase activity [GO:0008233]	cytoplasm [GO:0005737]		524.66	505.428	451.486	527.474	561.387	510.679	521.507	505.944	570.187	481.045	503.509	598.452	Proteasome&Peptidase
Q6PAR5	Gapvd1	GAPD1_MOUSE	Q6PAR5	GTPase-activating protein and VPS9 domain-containing protein 1 (GAPex-5) (Rab5-activating protein 6)	Gapvd1 Gapex5 Kiaa1521	FUNCTION: Acts both as a GTPase-activating protein (GAP) and a guanine nucleotide exchange factor (GEF), and participates in various processes such as endocytosis, insulin receptor internalization or LC2A4/GLUT4 trafficking. Acts as a GEF for the Ras-related protein RAB31 by exchanging bound GDP for free GTP, leading to regulate LC2A4/GLUT4 trafficking. In the absence of insulin, it maintains RAB…	Alternative splicing;Endocytosis;Endosome;GTPase activation;Guanine-nucleotide releasing factor;Membrane;Phosphoprotein;Reference proteome	endocytosis [GO:0006897]; regulation of GTPase activity [GO:0043087]; regulation of protein transport [GO:0051223]	GTPase activating protein binding [GO:0032794]; GTPase activator activity [GO:0005096]; guanyl-nucleotide exchange factor activity [GO:0005085]; small GTPase binding [GO:0031267]	cytosol [GO:0005829]; endocytic vesicle [GO:0030139]; endosome [GO:0005768]; plasma membrane [GO:0005886]		510.606	475.995	448.657	425.046	459.255	442.381	469.71	458.709	518.798	532.541	526.889	567.544	Proteasome&Peptidase
Q6PFX9	Tnks	TNKS1_MOUSE	Q6PFX9	Poly [ADP-ribose] polymerase tankyrase-1 (EC 2.4.2.30) (ADP-ribosyltransferase diphtheria toxin-like 5) (ARTD5) (Protein poly-ADP-ribosyltransferase tankyrase-1) (EC 2.4.2.-) (TRF1-interacting ankyrin-related ADP-ribose polymerase 1) (Tankyrase I) (Tankyrase-1) (TANK1)	Tnks Tnks1	FUNCTION: Poly-ADP-ribosyltransferase involved in various processes such as Wnt signaling pathway, telomere length and vesicle trafficking. Acts as an activator of the Wnt signaling pathway by mediating poly-ADP-ribosylation (PARsylation) of AXIN1 and AXIN2, 2 key components of the beta-catenin destruction complex: poly-ADP-ribosylated target proteins are recognized by RNF146, which mediates thei…	3D-structure;ADP-ribosylation;Alternative splicing;ANK repeat;Cell cycle;Cell division;Chromosome;Cytoplasm;Cytoskeleton;Glycosyltransferase;Golgi apparatus;Membrane;Metal-binding;Mitosis;mRNA transport;NAD;Nuclear pore complex;Nucleotidyltransferase;Nucleus;Phosphoprotein;Protein transport;Reference proteome;Repeat;Telomere;Transferase;Translocation;Transport;Ubl conjugation;Wnt signaling pathwa…	cell cycle [GO:0007049]; cell division [GO:0051301]; cellular response to nutrient [GO:0031670]; mRNA transport [GO:0051028]; negative regulation of maintenance of mitotic sister chromatid cohesion, telomeric [GO:1904908]; negative regulation of telomere maintenance via telomere lengthening [GO:1904357]; negative regulation of telomeric DNA binding [GO:1904743]; peptidyl-serine phosphorylation [G…	histone binding [GO:0042393]; NAD+ ADP-ribosyltransferase activity [GO:0003950]; NAD+-protein ADP-ribosyltransferase activity [GO:1990404]; nucleotidyltransferase activity [GO:0016779]; zinc ion binding [GO:0008270]	chromosome, telomeric region [GO:0000781]; cytoplasm [GO:0005737]; cytosol [GO:0005829]; Golgi apparatus [GO:0005794]; Golgi membrane [GO:0000139]; microtubule organizing center [GO:0005815]; mitotic spindle pole [GO:0097431]; nuclear body [GO:0016604]; nuclear membrane [GO:0031965]; nuclear pore [GO:0005643]; nucleoplasm [GO:0005654]; nucleus [GO:0005634]		NaN	NaN	NaN	NaN	NaN	63.4848	40.8871	NaN	NaN	NaN	NaN	NaN	Proteasome&Peptidase
Q7TSZ8	Nacc1	NACC1_MOUSE	Q7TSZ8	Nucleus accumbens-associated protein 1 (NAC-1) (BTB/POZ domain-containing protein 14B)	Nacc1 Btbd14b Nac1	FUNCTION: Functions as a transcriptional repressor. Seems to function as a transcriptional corepressor in neuronal cells through recruitment of HDAC3 and HDAC4. Contributes to tumor progression, and tumor cell proliferation and survival. This may be mediated at least in part through repressing transcriptional activity of GADD45GIP1. Required for recruiting the proteasome from the nucleus to the c…	Cytoplasm;Isopeptide bond;Nucleus;Phosphoprotein;Reference proteome;Repressor;Transcription;Transcription regulation;Ubl conjugation	negative regulation of DNA-templated transcription [GO:0045892]; positive regulation of cell population proliferation [GO:0008284]; regulation of transcription by RNA polymerase II [GO:0006357]	DNA-binding transcription factor activity, RNA polymerase II-specific [GO:0000981]; RNA polymerase II cis-regulatory region sequence-specific DNA binding [GO:0000978]	cell junction [GO:0030054]; cytoplasm [GO:0005737]; intracellular membrane-bounded organelle [GO:0043231]; nucleoplasm [GO:0005654]; nucleus [GO:0005634]		208.777	234.973	204.111	198.183	173.785	192.584	180.908	179.238	195.235	236.504	169.39	222.979	Proteasome&Peptidase
Q80TR8	Dcaf1	DCAF1_MOUSE	Q80TR8	DDB1- and CUL4-associated factor 1 (Serine/threonine-protein kinase VPRBP) (EC 2.7.11.1)	Dcaf1 Kiaa0800 Vprbp	FUNCTION: Acts both as a substrate recognition component of E3 ubiquitin-protein ligase complexes and as an atypical serine/threonine-protein kinase, playing key roles in various processes such as cell cycle, telomerase regulation and histone modification. Probable substrate-specific adapter of a DCX (DDB1-CUL4-X-box) E3 ubiquitin-protein ligase complex, named CUL4A-RBX1-DDB1-DCAF1/VPRBP complex,…	Acetylation;Alternative splicing;ATP-binding;Chromatin regulator;Cytoplasm;Host-virus interaction;Kinase;Nucleotide-binding;Nucleus;Phosphoprotein;Reference proteome;Repeat;Serine/threonine-protein kinase;Transcription;Transcription regulation;Transferase;Ubl conjugation pathway;WD repeat	B cell differentiation [GO:0030183]; cell competition in a multicellular organism [GO:0035212]; negative regulation of transcription by RNA polymerase II [GO:0000122]; phosphorylation [GO:0016310]; positive regulation of protein catabolic process [GO:0045732]; post-translational protein modification [GO:0043687]; protein ubiquitination [GO:0016567]; V(D)J recombination [GO:0033151]	ATP binding [GO:0005524]; histone H2AT120 kinase activity [GO:1990244]; nuclear estrogen receptor binding [GO:0030331]; protein serine kinase activity [GO:0106310]; protein serine/threonine kinase activity [GO:0004674]; ubiquitin ligase-substrate adaptor activity [GO:1990756]	COP9 signalosome [GO:0008180]; Cul4-RING E3 ubiquitin ligase complex [GO:0080008]; cytoplasm [GO:0005737]; fibrillar center [GO:0001650]; nucleoplasm [GO:0005654]; nucleus [GO:0005634]	PATHWAY: Protein modification; protein ubiquitination.	673.965	548.077	521.737	494.224	489.527	451.14	484.023	464.489	548.413	670.901	691.81	747.195	Proteasome&Peptidase
Q8BFR6	Zfand1	ZFAN1_MOUSE	Q8BFR6	AN1-type zinc finger protein 1 (Zinc finger AN1-type-containing protein 1)	Zfand1	FUNCTION: Plays a role in the regulation of cytoplasmic stress granules (SGs) turnover. SGs are dynamic and transient cytoplasmic ribonucleoprotein assemblies important for cellular protein homeostasis when protein production is suspended after acute exogenous stress. Associates with SGs and is involved in the efficient and specific arsenite-induced clearance process of SGs through the recruitmen…	3D-structure;Cytoplasm;Metal-binding;Reference proteome;Repeat;Zinc;Zinc-finger	cellular response to arsenite ion [GO:1903843]; positive regulation of intracellular protein transport [GO:0090316]; stress granule disassembly [GO:0035617]	proteasome binding [GO:0070628]; zinc ion binding [GO:0008270]	cytoplasm [GO:0005737]; cytoplasmic stress granule [GO:0010494]		297.612	297.542	281.936	329.876	343.122	376.377	352.587	302.026	335.42	339.243	337.932	398.874	Proteasome&Peptidase
Q8BGR9	Ublcp1	UBCP1_MOUSE	Q8BGR9	Ubiquitin-like domain-containing CTD phosphatase 1 (EC 3.1.3.16) (Nuclear proteasome inhibitor UBLCP1)	Ublcp1	FUNCTION: Dephosphorylates 26S nuclear proteasomes, thereby decreasing their proteolytic activity. Recruited to the 19S regulatory particle of the 26S proteasome through its interaction with 19S component PSMD2/RPN1. Once recruited, dephosphorylates 19S component PSMC2/RPT1 which impairs PSMC2 ATPase activity and disrupts 26S proteasome assembly. Has also been reported to stimulate the proteolyti…	3D-structure;Acetylation;Alternative splicing;Hydrolase;Magnesium;Metal-binding;Nucleus;Protein phosphatase;Reference proteome	negative regulation of ATP-dependent activity [GO:0032780]; protein dephosphorylation [GO:0006470]; regulation of proteasome assembly [GO:0090364]	metal ion binding [GO:0046872]; myosin phosphatase activity [GO:0017018]; proteasome regulatory particle binding [GO:1904855]; protein serine/threonine phosphatase activity [GO:0004722]	nucleolus [GO:0005730]; nucleoplasm [GO:0005654]; nucleus [GO:0005634]		788.123	901.087	782.332	787.252	988.394	942.509	821.393	849.378	884.517	806.571	918.051	729.726	Proteasome&Peptidase
Q8BHC7	Rhbdd1	RHBL4_MOUSE	Q8BHC7	Rhomboid-related protein 4 (RRP4) (EC 3.4.21.105) (Rhomboid domain-containing protein 1) (mRHBDD1) (Rhomboid-like protein 4)	Rhbdd1 Rhbdl4 MSD-50 MSD50	FUNCTION: Intramembrane-cleaving serine protease that cleaves single transmembrane or multi-pass membrane proteins in the hydrophobic plane of the membrane, luminal loops and juxtamembrane regions. Involved in regulated intramembrane proteolysis and the subsequent release of functional polypeptides from their membrane anchors. Functional component of endoplasmic reticulum-associated degradation (…	Apoptosis;Differentiation;Endoplasmic reticulum;Hydrolase;Membrane;Mitochondrion;Protease;Reference proteome;Serine protease;Spermatogenesis;Transmembrane;Transmembrane helix	apoptotic process [GO:0006915]; cellular response to unfolded protein [GO:0034620]; cellular response to UV [GO:0034644]; ERAD pathway [GO:0036503]; membrane protein intracellular domain proteolysis [GO:0031293]; membrane protein proteolysis [GO:0033619]; membrane protein proteolysis involved in retrograde protein transport, ER to cytosol [GO:1904211]; negative regulation of apoptotic process [GO…	endopeptidase activity [GO:0004175]; peptidase activity [GO:0008233]; serine-type endopeptidase activity [GO:0004252]	endoplasmic reticulum [GO:0005783]; endoplasmic reticulum membrane [GO:0005789]; endoplasmic reticulum quality control compartment [GO:0044322]; mitochondrial membrane [GO:0031966]		321.522	172.25	151.924	178.76	189.538	145.559	246.62	271.363	276.066	313.725	343.916	250.167	Proteasome&Peptidase
Q8BP48	Metap1	MAP11_MOUSE	Q8BP48	Methionine aminopeptidase 1 (MAP 1) (MetAP 1) (EC 3.4.11.18) (Peptidase M 1)	Metap1	FUNCTION: Cotranslationally removes the N-terminal methionine from nascent proteins. The N-terminal methionine is often cleaved when the second residue in the primary sequence is small and uncharged (Met-Ala-, Cys, Gly, Pro, Ser, Thr, or Val). {ECO:0000255|HAMAP-Rule:MF_03174, ECO:0000269|PubMed:35584675}.	3D-structure;Acetylation;Aminopeptidase;Cytoplasm;Hydrolase;Metal-binding;Protease;Reference proteome;Zinc;Zinc-finger	protein initiator methionine removal involved in protein maturation [GO:0035551]	aminopeptidase activity [GO:0004177]; metal ion binding [GO:0046872]; metalloaminopeptidase activity [GO:0070006]	cytosol [GO:0005829]		780.716	777.005	788	861.72	805.488	792.292	708.823	740.267	809.667	794.542	824.969	765.57	Proteasome&Peptidase
Q8BVG4	Dpp9	DPP9_MOUSE	Q8BVG4	Dipeptidyl peptidase 9 (DP9) (EC 3.4.14.5) (Dipeptidyl peptidase IX) (DPP IX) (Dipeptidyl peptidase-like protein 9) (DPLP9)	Dpp9	FUNCTION: Dipeptidyl peptidase that cleaves off N-terminal dipeptides from proteins having a Pro or Ala residue at position 2 (PubMed:24223149). Acts as a key inhibitor of caspase-1-dependent monocyte and macrophage pyroptosis in resting cells by preventing activation of NLRP1 and CARD8 (PubMed:27820798, PubMed:29396289). Sequesters the cleaved C-terminal part of NLRP1 and CARD8, which respective…	Alternative splicing;Aminopeptidase;Cytoplasm;Hydrolase;Protease;Reference proteome;Serine protease	negative regulation of programmed cell death [GO:0043069]; proteolysis [GO:0006508]; pyroptosis [GO:0070269]	aminopeptidase activity [GO:0004177]; dipeptidyl-peptidase activity [GO:0008239]; identical protein binding [GO:0042802]; serine-type peptidase activity [GO:0008236]	cell leading edge [GO:0031252]; cytosol [GO:0005829]; microtubule [GO:0005874]		402.033	332.206	355.315	320.788	368.688	302.758	305.573	321.944	361.528	476.592	521.624	457.193	Proteasome&Peptidase
Q8C0M9	Asrgl1	ASGL1_MOUSE	Q8C0M9	Isoaspartyl peptidase/L-asparaginase (EC 3.4.19.5) (EC 3.5.1.1) (Asparaginase-like protein 1) (Beta-aspartyl-peptidase) (Isoaspartyl dipeptidase) (L-asparagine amidohydrolase) [Cleaved into: Isoaspartyl peptidase/L-asparaginase alpha chain; Isoaspartyl peptidase/L-asparaginase beta chain]	Asrgl1	FUNCTION: Has both L-asparaginase and beta-aspartyl peptidase activity. May be involved in the production of L-aspartate, which can act as an excitatory neurotransmitter in some brain regions. Is highly active with L-Asp beta-methyl ester. Besides, has catalytic activity toward beta-aspartyl dipeptides and their methyl esters, including beta-L-Asp-L-Phe, beta-L-Asp-L-Phe methyl ester (aspartame),…	Autocatalytic cleavage;Cytoplasm;Direct protein sequencing;Hydrolase;Protease;Reference proteome	asparagine catabolic process via L-aspartate [GO:0033345]; protein autoprocessing [GO:0016540]	asparaginase activity [GO:0004067]; beta-aspartyl-peptidase activity [GO:0008798]	cytoplasm [GO:0005737]; photoreceptor inner segment [GO:0001917]		383.481	286.34	373.115	345.575	356.071	324.925	299.025	325.144	348.693	356.335	227.079	315.358	Proteasome&Peptidase
Q8C129	Lnpep	LCAP_MOUSE	Q8C129	Leucyl-cystinyl aminopeptidase (Cystinyl aminopeptidase) (EC 3.4.11.3) (Oxytocinase) (OTase)	Lnpep	FUNCTION: Release of an N-terminal amino acid, cleave before cysteine, leucine as well as other amino acids. Degrades peptide hormones such as oxytocin, vasopressin and angiotensin III, and plays a role in maintaining homeostasis during pregnancy. May be involved in the inactivation of neuronal peptides in the brain. Cleaves Met-enkephalin and dynorphin. Binds angiotensin IV and may be the angiot…	Acetylation;Aminopeptidase;Cell membrane;Glycoprotein;Hydrolase;Membrane;Metal-binding;Metalloprotease;Phosphoprotein;Protease;Reference proteome;Signal-anchor;Transmembrane;Transmembrane helix;Zinc	negative regulation of cold-induced thermogenesis [GO:0120163]; neuropeptide catabolic process [GO:0010813]; peptide catabolic process [GO:0043171]; positive regulation of blood pressure [GO:0045777]; protein catabolic process [GO:0030163]; proteolysis [GO:0006508]; regulation of blood pressure [GO:0008217]; regulation of long-term neuronal synaptic plasticity [GO:0048169]; response to hormone [G…	aminopeptidase activity [GO:0004177]; metalloaminopeptidase activity [GO:0070006]; peptide binding [GO:0042277]; zinc ion binding [GO:0008270]	cell surface [GO:0009986]; cytoplasm [GO:0005737]; cytoplasmic vesicle [GO:0031410]; cytoplasmic vesicle membrane [GO:0030659]; insulin-responsive compartment [GO:0032593]; intracellular membrane-bounded organelle [GO:0043231]; intracellular organelle [GO:0043229]; membrane [GO:0016020]; neuronal cell body [GO:0043025]; perinuclear region of cytoplasm [GO:0048471]; plasma membrane [GO:0005886]; v…		972.584	996.213	1003.89	1043.89	932.334	989.947	873.172	1065.47	1038.02	1119.81	1088.24	1009.77	Proteasome&Peptidase
Q8C167	Prepl	PPCEL_MOUSE	Q8C167	Prolyl endopeptidase-like (EC 3.4.21.-) (Prolylendopeptidase-like)	Prepl Kiaa0436	FUNCTION: Serine peptidase whose precise substrate specificity remains unclear (PubMed:21692504). Does not cleave peptides after a arginine or lysine residue (By similarity). Regulates trans-Golgi network morphology and sorting by regulating the membrane binding of the AP-1 complex (PubMed:23321636). May play a role in the regulation of synaptic vesicle exocytosis (By similarity). {ECO:0000250|Un…	Alternative splicing;Cytoplasm;Cytoskeleton;Golgi apparatus;Hydrolase;Nucleus;Phosphoprotein;Protease;Reference proteome;Serine protease	Golgi to plasma membrane protein transport [GO:0043001]; proteolysis [GO:0006508]; regulation of synaptic vesicle exocytosis [GO:2000300]; retrograde transport, endosome to Golgi [GO:0042147]	peptidase activity [GO:0008233]; serine-type endopeptidase activity [GO:0004252]	cytoskeleton [GO:0005856]; cytosol [GO:0005829]; Golgi apparatus [GO:0005794]; nucleus [GO:0005634]		175.107	149.459	135.794	123.751	136.653	158.484	119.902	133.347	153.998	213.021	185.586	209.951	Proteasome&Peptidase
Q8CHQ0	Fbxo4	FBX4_MOUSE	Q8CHQ0	F-box only protein 4	Fbxo4 Fbx4	FUNCTION: Substrate recognition component of a SCF (SKP1-CUL1-F-box protein) E3 ubiquitin-protein ligase complex that mediates the ubiquitination and subsequent proteasomal degradation of target proteins (PubMed:17081987, PubMed:18598945, PubMed:19767775, PubMed:29142209). Promotes ubiquitination of CCND1 and its subsequent proteasomal degradation (PubMed:17081987, PubMed:18598945, PubMed:1976777…	Cytoplasm;Phosphoprotein;Reference proteome;Ubl conjugation pathway	cellular homeostasis [GO:0019725]; cellular response to ionizing radiation [GO:0071479]; cellular senescence [GO:0090398]; common myeloid progenitor cell proliferation [GO:0035726]; negative regulation of fibroblast proliferation [GO:0048147]; negative regulation of protein localization to nucleus [GO:1900181]; positive regulation of protein polyubiquitination [GO:1902916]; positive regulation of…	protein homodimerization activity [GO:0042803]; ubiquitin ligase-substrate adaptor activity [GO:1990756]; ubiquitin protein ligase activity [GO:0061630]; ubiquitin-protein transferase activity [GO:0004842]	cytoplasm [GO:0005737]; SCF ubiquitin ligase complex [GO:0019005]; ubiquitin ligase complex [GO:0000151]	PATHWAY: Protein modification; protein ubiquitination. {ECO:0000269|PubMed:17081987, ECO:0000269|PubMed:18598945, ECO:0000269|PubMed:19767775, ECO:0000269|PubMed:29142209}.	309.601	308.945	272.28	230.838	239.268	234.949	223.77	218.634	238.935	354.454	413.679	393.476	Proteasome&Peptidase
Q8K224	Nat10	NAT10_MOUSE	Q8K224	RNA cytidine acetyltransferase (EC 2.3.1.-) (18S rRNA cytosine acetyltransferase) (N-acetyltransferase 10)	Nat10 Kiaa1709	FUNCTION: RNA cytidine acetyltransferase that catalyzes the formation of N(4)-acetylcytidine (ac4C) modification on mRNAs, 18S rRNA and tRNAs. Catalyzes ac4C modification of a broad range of mRNAs, enhancing mRNA stability and translation. mRNA ac4C modification is frequently present within wobble cytidine sites and promotes translation efficiency. Mediates the formation of ac4C at position 1842 …	Acetylation;Acyltransferase;ATP-binding;Nucleotide-binding;Nucleus;Phosphoprotein;Reference proteome;rRNA processing;Transferase;tRNA processing	negative regulation of telomere maintenance via telomerase [GO:0032211]; positive regulation of translation [GO:0045727]; protein acetylation [GO:0006473]; regulation of centrosome duplication [GO:0010824]; ribosomal small subunit biogenesis [GO:0042274]; rRNA acetylation involved in maturation of SSU-rRNA [GO:1904812]; tRNA acetylation [GO:0051391]	ATP binding [GO:0005524]; DNA polymerase binding [GO:0070182]; mRNA N-acetyltransferase activity [GO:0106162]; N-acetyltransferase activity [GO:0008080]; rRNA cytidine N-acetyltransferase activity [GO:1990883]; tRNA binding [GO:0000049]	midbody [GO:0030496]; nucleolus [GO:0005730]; small-subunit processome [GO:0032040]; telomerase holoenzyme complex [GO:0005697]		2263.97	2068.86	1989.41	2069.97	1899.48	1941.31	1825.4	1801.1	1875.52	1929.27	1848.1	1972.74	Proteasome&Peptidase
Q8K3B1	Fbxo45	FBSP1_MOUSE	Q8K3B1	F-box/SPRY domain-containing protein 1 (F-box only protein 45) (mFbxo45)	Fbxo45	FUNCTION: Component of E3 ubiquitin ligase complex consisting of FBXO45, MYCBP2 and SKP1. Functions in substrate recognition but plays also an important role in assembly of the complex (By similarity). Required for normal neuromuscular synaptogenesis, axon pathfinding and neuronal migration (PubMed:32341084). Regulates neuron migration during brain development through interaction with N-cadherin/…	Acetylation;Cell membrane;Cell projection;Developmental protein;Membrane;Neurogenesis;Nucleus;Postsynaptic cell membrane;Reference proteome;Secreted;Synapse;Ubl conjugation pathway	anterior commissure morphogenesis [GO:0021960]; cerebral cortex radially oriented cell migration [GO:0021799]; cerebral cortex tangential migration [GO:0021800]; corticospinal tract morphogenesis [GO:0021957]; DNA damage response [GO:0006974]; innervation [GO:0060384]; neuron migration [GO:0001764]; proteasome-mediated ubiquitin-dependent protein catabolic process [GO:0043161]; protein K48-linked…	ubiquitin ligase-substrate adaptor activity [GO:1990756]	cell projection [GO:0042995]; extracellular region [GO:0005576]; glutamatergic synapse [GO:0098978]; nucleus [GO:0005634]; postsynaptic cytosol [GO:0099524]; postsynaptic density [GO:0014069]; postsynaptic membrane [GO:0045211]; presynapse [GO:0098793]; presynaptic cytosol [GO:0099523]; presynaptic membrane [GO:0042734]; synapse [GO:0045202]	PATHWAY: Protein modification; protein ubiquitination.	135.283	125.595	148.991	140.983	133.634	153.778	136.347	98.2497	143.82	102.387	97.7712	126.985	Proteasome&Peptidase
Q8R1M0	Hmces	HMCES_MOUSE	Q8R1M0	Abasic site processing protein HMCES (Embryonic stem cell-specific 5-hydroxymethylcytosine-binding protein) (ES cell-specific 5hmC-binding protein) (Peptidase HMCES) (EC 3.4.-.-) (SRAP domain-containing protein 1)	Hmces Srap1 Srapd1	FUNCTION: Sensor of abasic sites in single-stranded DNA (ssDNA) required to preserve genome integrity by promoting error-free repair of abasic sites (By similarity). Acts as an enzyme that recognizes and binds abasic sites in ssDNA at replication forks and chemically modifies the lesion by forming a covalent cross-link with DNA: forms a stable thiazolidine linkage between a ring-opened abasic sit…	Autocatalytic cleavage;Chromosome;Covalent protein-DNA linkage;DNA damage;DNA-binding;Hydrolase;Isopeptide bond;Phosphoprotein;Protease;Reference proteome;Ubl conjugation	DNA damage response [GO:0006974]; double-strand break repair via alternative nonhomologous end joining [GO:0097681]; positive regulation of isotype switching [GO:0045830]; protein-DNA covalent cross-linking [GO:0018142]; proteolysis [GO:0006508]	peptidase activity [GO:0008233]; single-stranded DNA binding [GO:0003697]	replication fork [GO:0005657]		177.964	211.157	217.023	417.325	370.042	423.583	239.679	284.39	238.321	295.884	376.496	450.288	Proteasome&Peptidase
Q91V04	Tram1	TRAM1_MOUSE	Q91V04	Translocating chain-associated membrane protein 1 (Protein TRAM1)	Tram1 Tram	FUNCTION: Involved in the translocation of nascent protein chains into or through the endoplasmic reticulum (ER) membrane by facilitating the proper chain positioning at the SEC61 channel. Regulates the exposure of nascent secretory protein chain to the cytosol during translocation into the ER. May affect the phospholipid bilayer in the vicinity of the lateral gate of the SEC61 channel, thereby f…	Endoplasmic reticulum;Glycoprotein;Membrane;Phosphoprotein;Protein transport;Reference proteome;Translocation;Transmembrane;Transmembrane helix;Transport	cotranslational protein targeting to membrane [GO:0006613]; protein insertion into ER membrane [GO:0045048]; response to unfolded protein [GO:0006986]; SRP-dependent cotranslational protein targeting to membrane, translocation [GO:0006616]		endoplasmic reticulum [GO:0005783]; endoplasmic reticulum membrane [GO:0005789]		180.495	163.695	149.797	124.9	102.711	116.753	135.769	134.387	152.709	125.87	171.643	201.391	Proteasome&Peptidase
Q920A5	Scpep1	RISC_MOUSE	Q920A5	Retinoid-inducible serine carboxypeptidase (EC 3.4.16.-) (Serine carboxypeptidase 1)	Scpep1 Risc	FUNCTION: May be involved in vascular wall and kidney homeostasis.	Carboxypeptidase;Glycoprotein;Hydrolase;Protease;Reference proteome;Secreted;Signal	blood vessel diameter maintenance [GO:0097746]; negative regulation of blood pressure [GO:0045776]; proteolysis [GO:0006508]	serine-type carboxypeptidase activity [GO:0004185]	cytosol [GO:0005829]; extracellular region [GO:0005576]		760.047	647.574	581.372	607.679	654.161	524.663	568.739	612.011	607.42	771.349	692.924	796.686	Proteasome&Peptidase
Q922Y1	Ubxn1	UBXN1_MOUSE	Q922Y1	UBX domain-containing protein 1 (Protein 2B28) (SAPK substrate protein 1) (UBA/UBX 33.3 kDa protein) (mY33K)	Ubxn1 D19Ertd721e Saks1	FUNCTION: Ubiquitin-binding protein that plays a role in the modulation of innate immune response. Blocks both the RIG-I-like receptors (RLR) and NF-kappa-B pathways. Following viral infection, UBXN1 is induced and recruited to the RLR component MAVS. In turn, interferes with MAVS oligomerization, and disrupts the MAVS/TRAF3/TRAF6 signalosome. This function probably serves as a brake to prevent e…	3D-structure;Acetylation;Coiled coil;Cytoplasm;Phosphoprotein;Reference proteome	negative regulation of ERAD pathway [GO:1904293]; negative regulation of proteasomal ubiquitin-dependent protein catabolic process [GO:0032435]; negative regulation of protein K48-linked deubiquitination [GO:1903094]; negative regulation of protein ubiquitination [GO:0031397]; negative regulation of ubiquitin-specific protease activity [GO:2000157]	ATPase binding [GO:0051117]; K48-linked polyubiquitin modification-dependent protein binding [GO:0036435]; K6-linked polyubiquitin modification-dependent protein binding [GO:0071796]; polyubiquitin modification-dependent protein binding [GO:0031593]; proteasome regulatory particle binding [GO:1904855]; ubiquitin binding [GO:0043130]; ubiquitin protein ligase binding [GO:0031625]	cytoplasm [GO:0005737]; cytosol [GO:0005829]; dendrite [GO:0030425]; endoplasmic reticulum [GO:0005783]; neuronal cell body [GO:0043025]; nucleoplasm [GO:0005654]; nucleus [GO:0005634]; VCP-NPL4-UFD1 AAA ATPase complex [GO:0034098]		1471.04	1527.39	1472.4	1441.82	1694.89	1417.25	1496.69	1478.13	1536.21	1425.59	1558.85	1384.01	Proteasome&Peptidase
Q924H7	Wac	WAC_MOUSE	Q924H7	WW domain-containing adapter protein with coiled-coil	Wac Kiaa1844	FUNCTION: Acts as a linker between gene transcription and histone H2B monoubiquitination at 'Lys-120' (H2BK120ub1). Interacts with the RNA polymerase II transcriptional machinery via its WW domain and with RNF20-RNF40 via its coiled coil region, thereby linking and regulating H2BK120ub1 and gene transcription. Regulates the cell-cycle checkpoint activation in response to DNA damage. Positive regu…	Acetylation;Alternative splicing;Chromatin regulator;Coiled coil;Nucleus;Phosphoprotein;Reference proteome;Transcription;Transcription regulation	chromatin remodeling [GO:0006338]; DNA damage response [GO:0006974]; histone H2B conserved C-terminal lysine ubiquitination [GO:0071894]; histone monoubiquitination [GO:0010390]; mitotic G1 DNA damage checkpoint signaling [GO:0031571]; negative regulation of proteasomal ubiquitin-dependent protein catabolic process [GO:0032435]; positive regulation of DNA-templated transcription [GO:0045893]; pos…	chromatin binding [GO:0003682]; RNA polymerase II complex binding [GO:0000993]	nuclear speck [GO:0016607]; nucleoplasm [GO:0005654]; nucleus [GO:0005634]; spliceosomal complex [GO:0005681]		185.806	185.241	175.003	150.453	159.222	175.206	145.507	156.946	150.821	139.576	176.111	188.041	Proteasome&Peptidase
Q99J56	Derl1	DERL1_MOUSE	Q99J56	Derlin-1 (Degradation in endoplasmic reticulum protein 1) (Der1-like protein 1)	Derl1 Der1	FUNCTION: Functional component of endoplasmic reticulum-associated degradation (ERAD) for misfolded lumenal proteins. Forms homotetramers which encircle a large channel traversing the endoplasmic reticulum (ER) membrane. This allows the retrotranslocation of misfolded proteins from the ER into the cytosol where they are ubiquitinated and degraded by the proteasome. The channel has a lateral gate …	Acetylation;Endoplasmic reticulum;Membrane;Phosphoprotein;Protein transport;Reference proteome;Transmembrane;Transmembrane helix;Transport;Unfolded protein response	cellular response to unfolded protein [GO:0034620]; endoplasmic reticulum unfolded protein response [GO:0030968]; ER-associated misfolded protein catabolic process [GO:0071712]; ERAD pathway [GO:0036503]; positive regulation of protein binding [GO:0032092]; positive regulation of protein ubiquitination [GO:0031398]; proteasome-mediated ubiquitin-dependent protein catabolic process [GO:0043161]; p…	ATPase binding [GO:0051117]; identical protein binding [GO:0042802]; MHC class I protein binding [GO:0042288]; misfolded protein binding [GO:0051787]; protease binding [GO:0002020]; protein-containing complex binding [GO:0044877]; signal recognition particle binding [GO:0005047]; ubiquitin protein ligase binding [GO:0031625]; ubiquitin-specific protease binding [GO:1990381]	Derlin-1 retrotranslocation complex [GO:0036513]; Derlin-1-VIMP complex [GO:0036502]; early endosome [GO:0005769]; endoplasmic reticulum [GO:0005783]; endoplasmic reticulum membrane [GO:0005789]; endoplasmic reticulum quality control compartment [GO:0044322]; Hrd1p ubiquitin ligase ERAD-L complex [GO:0000839]; late endosome [GO:0005770]; membrane [GO:0016020]		278.452	308.653	282.666	247.479	341.611	246.665	371.469	342.61	399.111	313.204	306.482	342.691	Proteasome&Peptidase
Q99KK7	Dpp3	DPP3_MOUSE	Q99KK7	Dipeptidyl peptidase 3 (EC 3.4.14.4) (Dipeptidyl aminopeptidase III) (Dipeptidyl arylamidase III) (Dipeptidyl peptidase III) (DPP III) (Enkephalinase B)	Dpp3	FUNCTION: Cleaves and degrades bioactive peptides, including angiotensin, Leu-enkephalin and Met-enkephalin. Also cleaves Arg-Arg-beta-naphthylamide (in vitro). {ECO:0000250|UniProtKB:Q9NY33}.	Acetylation;Aminopeptidase;Cytoplasm;Hydrolase;Metal-binding;Metalloprotease;Protease;Reference proteome;Zinc	protein catabolic process [GO:0030163]; proteolysis [GO:0006508]	aminopeptidase activity [GO:0004177]; dipeptidyl-peptidase activity [GO:0008239]; metalloexopeptidase activity [GO:0008235]; zinc ion binding [GO:0008270]	cytoplasm [GO:0005737]; cytosol [GO:0005829]		1449.71	1427.12	1443.32	1302.2	1323.02	1252.98	1316.24	1381.83	1309.68	1489.43	1360.31	1423.02	Proteasome&Peptidase
Q9CPY7	Lap3	AMPL_MOUSE	Q9CPY7	Cytosol aminopeptidase (EC 3.4.11.1) (Cysteinylglycine-S-conjugate dipeptidase) (EC 3.4.13.23) (Leucine aminopeptidase 3) (LAP-3) (Leucyl aminopeptidase) (Peptidase S) (Proline aminopeptidase) (EC 3.4.11.5) (Prolyl aminopeptidase)	Lap3 Lapep	FUNCTION: Cytosolic metallopeptidase that catalyzes the removal of unsubstituted N-terminal hydrophobic amino acids from various peptides. The presence of Zn(2+) ions is essential for the peptidase activity, and the association with other cofactors can modulate the substrate spectificity of the enzyme. For instance, in the presence of Mn(2+), it displays a specific Cys-Gly hydrolyzing activity of…	Acetylation;Alternative initiation;Aminopeptidase;Cytoplasm;Direct protein sequencing;Hydrolase;Magnesium;Manganese;Metal-binding;Phosphoprotein;Protease;Reference proteome;Zinc	proteolysis [GO:0006508]	carboxypeptidase activity [GO:0004180]; manganese ion binding [GO:0030145]; metalloaminopeptidase activity [GO:0070006]; peptidase activity [GO:0008233]	cytoplasm [GO:0005737]; mitochondrion [GO:0005739]; trans-Golgi network [GO:0005802]		2881.73	2772.1	2564.85	2506.06	2700.26	2454.46	2558.99	2753.7	2876.03	2778.5	2750.42	2554.14	Proteasome&Peptidase
Q9CQT5	Pomp	POMP_MOUSE	Q9CQT5	Proteasome maturation protein (Proteassemblin) (Protein UMP1 homolog) (mUMP1)	Pomp	FUNCTION: Molecular chaperone essential for the assembly of standard proteasomes and immunoproteasomes. Degraded after completion of proteasome maturation (By similarity). Mediates the association of 20S preproteasome with the endoplasmic reticulum (By similarity). {ECO:0000250}.	Chaperone;Cytoplasm;Endoplasmic reticulum;Isopeptide bond;Membrane;Microsome;Nucleus;Reference proteome;Ubl conjugation	proteasome assembly [GO:0043248]		cytoplasm [GO:0005737]; cytosol [GO:0005829]; endoplasmic reticulum [GO:0005783]; membrane [GO:0016020]; nuclear speck [GO:0016607]; nucleus [GO:0005634]		577.675	772.075	667.159	618.608	714.067	668.382	599.937	497.734	458.426	514.616	596.849	744.216	Proteasome&Peptidase
Q9CQT7	Desi1	DESI1_MOUSE	Q9CQT7	Desumoylating isopeptidase 1 (DeSI-1) (EC 3.4.-.-) (PPPDE peptidase domain-containing protein 2)	Desi1 D15Wsu75e Fam152b Pppde2	FUNCTION: Protease which deconjugates SUMO1, SUMO2 and SUMO3 from some substrate proteins (PubMed:22370726, PubMed:22498933). Has isopeptidase but not SUMO-processing activity (PubMed:22370726, PubMed:22498933). Desumoylates ZBTB46 (PubMed:22370726). Collaborates with UBQLN4 in the export of ubiquitinated proteins from the nucleus to the cytoplasm (By similarity). {ECO:0000250|UniProtKB:Q6ICB0, E…	3D-structure;Cytoplasm;Hydrolase;Nucleus;Protease;Reference proteome	protein desumoylation [GO:0016926]; protein export from nucleus [GO:0006611]; protein modification by small protein removal [GO:0070646]; regulation of proteasomal ubiquitin-dependent protein catabolic process [GO:0032434]	deSUMOylase activity [GO:0016929]; identical protein binding [GO:0042802]; importin-alpha family protein binding [GO:0061676]	cytosol [GO:0005829]; nucleus [GO:0005634]; protein-containing complex [GO:0032991]		366.172	265.397	282.661	243.793	307.607	171.483	136.218	93.2726	62.5859	92.0933	99.1365	169.445	Proteasome&Peptidase
Q9CXT6	Kdm8	KDM8_MOUSE	Q9CXT6	Bifunctional peptidase and arginyl-hydroxylase JMJD5 (EC 1.14.11.73) (EC 3.4.-.-) (JmjC domain-containing protein 5) (Jumonji C domain-containing protein 5) (L-arginine (3R)-hydroxylase KDM8) (Lysine-specific demethylase 8)	Kdm8 Jmjd5	FUNCTION: Bifunctional enzyme that acts both as an endopeptidase and 2-oxoglutarate-dependent monooxygenase. Endopeptidase that cleaves histones N-terminal tails at the carboxyl side of methylated arginine or lysine residues, to generate 'tailless nucleosomes', which may trigger transcription elongation. Preferentially recognizes and cleaves monomethylated and dimethylated arginine residues of hi…	Aminopeptidase;Biological rhythms;Cell cycle;Chromatin regulator;Chromosome;Dioxygenase;Hydrolase;Iron;Metal-binding;Nucleus;Oxidoreductase;Protease;Reference proteome;Transcription;Transcription regulation	circadian regulation of gene expression [GO:0032922]; G2/M transition of mitotic cell cycle [GO:0000086]; negative regulation of DNA-templated transcription [GO:0045892]; positive regulation of DNA-templated transcription [GO:0045893]; protein destabilization [GO:0031648]; proteolysis [GO:0006508]	aminopeptidase activity [GO:0004177]; chromatin binding [GO:0003682]; endopeptidase activity [GO:0004175]; histone H3K36 demethylase activity [GO:0051864]; metal ion binding [GO:0046872]; methylated histone binding [GO:0035064]; peptidyl-arginine 3-dioxygenase activity [GO:0106157]	chromosome [GO:0005694]; cytosol [GO:0005829]; nucleoplasm [GO:0005654]; nucleus [GO:0005634]		81.0271	75.0915	69.1033	70.0965	74.2302	71.2434	45.6758	33.0305	82.3262	135.497	32.0729	135.718	Proteasome&Peptidase
Q9CZH3	Psmg3	PSMG3_MOUSE	Q9CZH3	Proteasome assembly chaperone 3 (PAC-3) (mPAC3)	Psmg3 Pac3	FUNCTION: Chaperone protein which promotes assembly of the 20S proteasome. May cooperate with PSMG1-PSMG2 heterodimers to orchestrate the correct assembly of proteasomes. {ECO:0000269|PubMed:17707236}.	Acetylation;Chaperone;Reference proteome	chaperone-mediated protein complex assembly [GO:0051131]; proteasome assembly [GO:0043248]	molecular adaptor activity [GO:0060090]; protein-containing complex binding [GO:0044877]	protein-containing complex [GO:0032991]		1455.45	1279.92	1428.28	1381.89	1466.87	1351.98	1193.83	1177.96	1147.8	1059.21	1076.51	1152.09	Proteasome&Peptidase
Q9D1A2	Cndp2	CNDP2_MOUSE	Q9D1A2	Cytosolic non-specific dipeptidase (EC 3.4.13.18) (CNDP dipeptidase 2) (Glutamate carboxypeptidase-like protein 1) (Threonyl dipeptidase)	Cndp2 Cn2	FUNCTION: Catalyzes the peptide bond hydrolysis in dipeptides, displaying a non-redundant activity toward threonyl dipeptides (PubMed:31587987). Mediates threonyl dipeptide catabolism in a tissue-specific way (PubMed:31587987). Has high dipeptidase activity toward cysteinylglycine, an intermediate metabolite in glutathione metabolism (By similarity). Metabolizes N-lactoyl-amino acids, both throug…	3D-structure;Carboxypeptidase;Cytoplasm;Direct protein sequencing;Hydrolase;Manganese;Metal-binding;Metalloprotease;Phosphoprotein;Protease;Reference proteome	proteolysis [GO:0006508]	alanylglutamate dipeptidase activity [GO:0103046]; carboxypeptidase activity [GO:0004180]; dipeptidase activity [GO:0016805]; metal ion binding [GO:0046872]; metallodipeptidase activity [GO:0070573]; peptidase activity [GO:0008233]	cytosol [GO:0005829]; nucleoplasm [GO:0005654]		2530.38	2445.33	2165.75	2298.05	2299.18	2257.34	2056.28	2173.8	2006.79	2177.82	2199.02	2024.07	Proteasome&Peptidase
Q9D1H7	Get4	GET4_MOUSE	Q9D1H7	Golgi to ER traffic protein 4 homolog	Get4	FUNCTION: As part of a cytosolic protein quality control complex, the BAG6/BAT3 complex, maintains misfolded and hydrophobic patches-containing proteins in a soluble state and participates in their proper delivery to the endoplasmic reticulum or alternatively can promote their sorting to the proteasome where they undergo degradation. The BAG6/BAT3 complex is involved in the post-translational del…	Acetylation;Alternative splicing;Cytoplasm;Reference proteome;Transport;Ubl conjugation	cytoplasmic sequestering of protein [GO:0051220]; maintenance of unfolded protein involved in ERAD pathway [GO:1904378]; post-translational protein targeting to endoplasmic reticulum membrane [GO:0006620]; protein insertion into ER membrane [GO:0045048]; regulation of protein stability [GO:0031647]; tail-anchored membrane protein insertion into ER membrane [GO:0071816]; ubiquitin-dependent protei…	protein-folding chaperone binding [GO:0051087]	BAT3 complex [GO:0071818]; chromosome [GO:0005694]; cytoplasm [GO:0005737]; cytosol [GO:0005829]; nucleolus [GO:0005730]; nucleoplasm [GO:0005654]		394.17	315.034	336.679	388.249	287.747	286.046	285.394	290.659	299.691	354.67	467.607	328.684	Proteasome&Peptidase
Q9D479	Uvssa	UVSSA_MOUSE	Q9D479	UV-stimulated scaffold protein A	Uvssa Kiaa1530	FUNCTION: Factor involved in transcription-coupled nucleotide excision repair (TC-NER), a mechanism that rapidly removes RNA polymerase II-blocking lesions from the transcribed strand of active genes. Facilitates the ubiquitination of the elongating form of RNA polymerase II (RNA pol IIo) at DNA damage sites, thereby promoting RNA pol IIo backtracking and access by the TC-NER machinery to lesion …	Chromosome;Coiled coil;DNA damage;DNA repair;Isopeptide bond;Phosphoprotein;Reference proteome;Ubl conjugation	protein ubiquitination [GO:0016567]; response to UV [GO:0009411]; transcription-coupled nucleotide-excision repair [GO:0006283]	RNA polymerase II complex binding [GO:0000993]	chromosome [GO:0005694]; nucleoplasm [GO:0005654]		281.927	207.23	181.893	184.619	203.751	188.068	208.927	213.064	266.87	223.785	348.848	290.379	Proteasome&Peptidase
Q9D8C4	Ifi35	IN35_MOUSE	Q9D8C4	Interferon-induced 35 kDa protein homolog (IFP 35) (Ifi-35)	Ifi35 Ifp35	FUNCTION: Acts as a signaling pathway regulator involved in innate immune system response (PubMed:29350881). In response to interferon IFN-alpha, associates in a complex with transcriptional regulator NMI to regulate immune response; the complex formation prevents proteasome-mediated degradation of IFI35 and correlates with IFI35 dephosphorylation (By similarity). In complex with NMI, inhibits vi…	Cytoplasm;Immunity;Innate immunity;Nucleus;Phosphoprotein;Reference proteome;Secreted	innate immune response [GO:0045087]; macrophage activation involved in immune response [GO:0002281]; negative regulation of cell population proliferation [GO:0008285]; negative regulation of NIK/NF-kappaB signaling [GO:1901223]; positive regulation of inflammatory response [GO:0050729]; positive regulation of innate immune response [GO:0045089]; positive regulation of NIK/NF-kappaB signaling [GO:…	identical protein binding [GO:0042802]	cytoplasm [GO:0005737]; cytosol [GO:0005829]; extracellular space [GO:0005615]; membrane [GO:0016020]; nucleolus [GO:0005730]; nucleoplasm [GO:0005654]; nucleus [GO:0005634]		935.461	954.861	889.982	918.165	833.273	900.363	1083.55	940.239	991.525	917.042	1000.1	1158.01	Proteasome&Peptidase
Q9D8H7	Oma1	OMA1_MOUSE	Q9D8H7	Metalloendopeptidase OMA1, mitochondrial (EC 3.4.24.-) (Overlapping with the m-AAA protease 1 homolog)	Oma1	FUNCTION: Metalloprotease that is part of the quality control system in the inner membrane of mitochondria (PubMed:20038678, PubMed:22433842, PubMed:24550258, PubMed:24719224, PubMed:24616225, PubMed:26785494). Activated in response to various mitochondrial stress, leading to the proteolytic cleavage of target proteins, such as OPA1, UQCC3 and DELE1 (PubMed:20038678, PubMed:22433842, PubMed:24550…	Alternative splicing;Autocatalytic cleavage;Direct protein sequencing;Disulfide bond;Hydrolase;Lipid-binding;Membrane;Metal-binding;Metalloprotease;Mitochondrion;Mitochondrion inner membrane;Protease;Reference proteome;Transit peptide;Transmembrane;Transmembrane helix;Zinc;Zymogen	cristae formation [GO:0042407]; diet induced thermogenesis [GO:0002024]; energy homeostasis [GO:0097009]; glucose metabolic process [GO:0006006]; HRI-mediated signaling [GO:0140468]; integrated stress response signaling [GO:0140467]; lipid metabolic process [GO:0006629]; mitochondrial protein processing [GO:0034982]; mitochondrial respiratory chain complex assembly [GO:0033108]; mitochondrion org…	lipid binding [GO:0008289]; metal ion binding [GO:0046872]; metalloendopeptidase activity [GO:0004222]	mitochondrial inner membrane [GO:0005743]; mitochondrial membrane [GO:0031966]; mitochondrion [GO:0005739]		NaN	129.155	NaN	105.207	148.722	NaN	NaN	NaN	NaN	NaN	NaN	NaN	Proteasome&Peptidase
Q9DB27	Mcts1	MCTS1_MOUSE	Q9DB27	Malignant T-cell-amplified sequence 1 (MCT-1) (Multiple copies T-cell malignancies 1)	Mcts1	FUNCTION: Anti-oncogene that plays a role in cell cycle regulation; decreases cell doubling time and anchorage-dependent growth; shortens the duration of G1 transit time and G1/S transition. When constitutively expressed, increases CDK4 and CDK6 kinases activity and CCND1/cyclin D1 protein level, as well as G1 cyclin/CDK complex formation. Involved in translation initiation; promotes recruitment …	Alternative splicing;Cell cycle;Cytoplasm;DNA damage;Growth regulation;Initiation factor;Phosphoprotein;Protein biosynthesis;Reference proteome;Transcription;Transcription regulation;Tumor suppressor	cell cycle [GO:0007049]; DNA damage response [GO:0006974]; formation of translation preinitiation complex [GO:0001731]; IRES-dependent viral translational initiation [GO:0075522]; ribosome disassembly [GO:0032790]	RNA binding [GO:0003723]; translation initiation factor activity [GO:0003743]	cytosolic small ribosomal subunit [GO:0022627]		976.941	1067.23	1121.37	1134.59	1023.52	1088.8	1030.4	1014.83	1070.57	911.607	933.395	1077.32	Proteasome&Peptidase
Q9DC61	Pmpca	MPPA_MOUSE	Q9DC61	Mitochondrial-processing peptidase subunit alpha (Alpha-MPP) (Inactive zinc metalloprotease alpha) (P-55)	Pmpca Inpp5e	FUNCTION: Substrate recognition and binding subunit of the essential mitochondrial processing protease (MPP), which cleaves the mitochondrial sequence off newly imported precursors proteins. {ECO:0000250|UniProtKB:Q10713}.	Acetylation;Direct protein sequencing;Membrane;Mitochondrion;Mitochondrion inner membrane;Reference proteome;Transit peptide	protein processing [GO:0016485]; protein processing involved in protein targeting to mitochondrion [GO:0006627]	endopeptidase activity [GO:0004175]; metal ion binding [GO:0046872]; metalloendopeptidase activity [GO:0004222]; metallopeptidase activity [GO:0008237]	mitochondrial inner membrane [GO:0005743]; mitochondrial matrix [GO:0005759]; mitochondrion [GO:0005739]		668.995	662.384	624.565	598.231	611.693	601.746	549.152	547.629	614.619	637.264	706.877	707.639	Proteasome&Peptidase
Q9DC63	Fbxo3	FBX3_MOUSE	Q9DC63	F-box only protein 3	Fbxo3 Fba Fbx3	FUNCTION: Substrate recognition component of the SCF (SKP1-CUL1-F-box protein)-type E3 ubiquitin ligase complex, SCF(FBXO3), which mediates the ubiquitination and subsequent proteasomal degradation of target proteins (By similarity). Mediates the ubiquitination of HIPK2 and probably that of EP300, leading to rapid degradation by the proteasome (By similarity). In the presence of PML, HIPK2 ubiqui…	Alternative splicing;Nucleus;Reference proteome;Ubl conjugation pathway	protein ubiquitination [GO:0016567]; response to lipopolysaccharide [GO:0032496]; SCF-dependent proteasomal ubiquitin-dependent protein catabolic process [GO:0031146]	ubiquitin ligase-substrate adaptor activity [GO:1990756]	cytoplasm [GO:0005737]; cytosol [GO:0005829]; nucleoplasm [GO:0005654]; SCF ubiquitin ligase complex [GO:0019005]	PATHWAY: Protein modification; protein ubiquitination. {ECO:0000269|PubMed:23542741}.	161.979	141.945	129.36	135.552	134.195	125.741	126.344	124.835	160.269	187.672	189.558	172.189	Proteasome&Peptidase
Q9EQH2	Erap1	ERAP1_MOUSE	Q9EQH2	Endoplasmic reticulum aminopeptidase 1 (EC 3.4.11.-) (ARTS-1) (Adipocyte-derived leucine aminopeptidase) (A-LAP) (Aminopeptidase PILS) (Puromycin-insensitive leucyl-specific aminopeptidase) (PILS-AP) (VEGF-induced aminopeptidase)	Erap1 Appils Arts1	FUNCTION: Aminopeptidase that plays a central role in peptide trimming, a step required for the generation of most HLA class I-binding peptides. Peptide trimming is essential to customize longer precursor peptides to fit them to the correct length required for presentation on MHC class I molecules. Strongly prefers substrates 9-16 residues long. Rapidly degrades 13-mer to a 9-mer and then stops. …	Adaptive immunity;Aminopeptidase;Disulfide bond;Endoplasmic reticulum;Glycoprotein;Hydrolase;Immunity;Membrane;Metal-binding;Metalloprotease;Protease;Reference proteome;Signal-anchor;Transmembrane;Transmembrane helix;Zinc	adaptive immune response [GO:0002250]; membrane protein ectodomain proteolysis [GO:0006509]; peptide catabolic process [GO:0043171]; positive regulation of angiogenesis [GO:0045766]; protein catabolic process [GO:0030163]; proteolysis [GO:0006508]	aminopeptidase activity [GO:0004177]; endopeptidase activity [GO:0004175]; interleukin-6 receptor binding [GO:0005138]; metalloaminopeptidase activity [GO:0070006]; metalloexopeptidase activity [GO:0008235]; peptidase activity [GO:0008233]; peptide binding [GO:0042277]; tumor necrosis factor receptor binding [GO:0005164]; zinc ion binding [GO:0008270]	cytoplasm [GO:0005737]; endoplasmic reticulum lumen [GO:0005788]; endoplasmic reticulum membrane [GO:0005789]; extracellular region [GO:0005576]; intracellular membrane-bounded organelle [GO:0043231]		2936.92	2814.69	2984.85	3067.22	3047.31	2971.43	2747.98	2815.95	2578.4	2848.59	2695.02	2673.6	Proteasome&Peptidase
Q9EST4	Psmg2	PSMG2_MOUSE	Q9EST4	Proteasome assembly chaperone 2 (CD40 ligand-activated specific transcript 3) (Tumor necrosis factor superfamily member 5-induced protein 1)	Psmg2 Clast3 Tnfsf5ip1	FUNCTION: Chaperone protein which promotes assembly of the 20S proteasome as part of a heterodimer with PSMG1. The PSMG1-PSMG2 heterodimer binds to the PSMA5 and PSMA7 proteasome subunits, promotes assembly of the proteasome alpha subunits into the heteroheptameric alpha ring and prevents alpha ring dimerization (By similarity). {ECO:0000250|UniProtKB:Q969U7}.	Alternative splicing;Chaperone;Nucleus;Phosphoprotein;Reference proteome	chaperone-mediated protein complex assembly [GO:0051131]; mitotic spindle assembly checkpoint signaling [GO:0007094]; negative regulation of apoptotic process [GO:0043066]; proteasome assembly [GO:0043248]; regulation of cell cycle [GO:0051726]	molecular adaptor activity [GO:0060090]	cytosol [GO:0005829]; nucleus [GO:0005634]; protein folding chaperone complex [GO:0101031]		461.227	292.031	335.452	283.048	282.46	258.141	260.114	308.07	244.983	389.451	225.393	295.465	Proteasome&Peptidase
Q9ESW8	Pgpep1	PGPI_MOUSE	Q9ESW8	Pyroglutamyl-peptidase 1 (EC 3.4.19.3) (5-oxoprolyl-peptidase) (Pyroglutamyl aminopeptidase I) (PAP-I) (Pyroglutamyl-peptidase I) (PGP-I) (Pyrrolidone-carboxylate peptidase)	Pgpep1 Pgpi	FUNCTION: Removes 5-oxoproline from various penultimate amino acid residues except L-proline. {ECO:0000250}.	Cytoplasm;Hydrolase;Protease;Reference proteome;Thiol protease	protein catabolic process [GO:0030163]; proteolysis [GO:0006508]	peptidase activity [GO:0008233]; pyroglutamyl-peptidase activity [GO:0016920]	cytosol [GO:0005829]		147.874	105.293	97.7404	127.617	97.5678	87.4301	113.303	112.745	169.703	169.741	131.304	159.896	Proteasome&Peptidase
Q9ET22	Dpp7	DPP2_MOUSE	Q9ET22	Dipeptidyl peptidase 2 (EC 3.4.14.2) (Dipeptidyl aminopeptidase II) (Dipeptidyl peptidase 7) (Dipeptidyl peptidase II) (DPP II) (Quiescent cell proline dipeptidase)	Dpp7 Dpp2 Qpp	FUNCTION: Plays an important role in the degradation of some oligopeptides.	Aminopeptidase;Cytoplasmic vesicle;Glycoprotein;Hydrolase;Lysosome;Protease;Reference proteome;Secreted;Serine protease;Signal;Zymogen	lysosomal protein catabolic process [GO:1905146]; protein catabolic process [GO:0030163]; proteolysis [GO:0006508]	aminopeptidase activity [GO:0004177]; dipeptidyl-peptidase activity [GO:0008239]; serine-type peptidase activity [GO:0008236]	cytoplasmic vesicle [GO:0031410]; cytosol [GO:0005829]; extracellular region [GO:0005576]; Golgi apparatus [GO:0005794]; intracellular membrane-bounded organelle [GO:0043231]; lysosome [GO:0005764]; vesicle [GO:0031982]		453.593	454.705	376.622	483.792	320.808	443.852	464.028	390.202	514.354	463.174	505.78	383.989	Proteasome&Peptidase
Q9JJF9	Sppl2a	SPP2A_MOUSE	Q9JJF9	Signal peptide peptidase-like 2A (SPP-like 2A) (SPPL2a) (EC 3.4.23.-) (Intramembrane protease 3) (IMP-3) (Presenilin-like protein 2)	Sppl2a Imp3 Psl2 MNCb-3763	FUNCTION: Intramembrane-cleaving aspartic protease (I-CLiP) that cleaves type II membrane signal peptides in the hydrophobic plane of the membrane. Functions in FASLG, ITM2B and TNF processing. Catalyzes the intramembrane cleavage of the anchored fragment of shed TNF-alpha (TNF), which promotes the release of the intracellular domain (ICD) for signaling to the nucleus. Also responsible for the in…	Endosome;Glycoprotein;Hydrolase;Lysosome;Membrane;Protease;Reference proteome;Signal;Transmembrane;Transmembrane helix	membrane protein ectodomain proteolysis [GO:0006509]; membrane protein intracellular domain proteolysis [GO:0031293]; membrane protein proteolysis [GO:0033619]; regulation of immune response [GO:0050776]	aspartic endopeptidase activity, intramembrane cleaving [GO:0042500]; protein homodimerization activity [GO:0042803]	cytoplasmic side of endoplasmic reticulum membrane [GO:0098554]; Golgi-associated vesicle membrane [GO:0030660]; intracellular membrane-bounded organelle [GO:0043231]; late endosome [GO:0005770]; late endosome membrane [GO:0031902]; lumenal side of endoplasmic reticulum membrane [GO:0098553]; lysosomal membrane [GO:0005765]; membrane [GO:0016020]; plasma membrane [GO:0005886]		600.885	540.564	575.062	561.816	582.911	545.133	434.824	566.329	536.722	508.743	523.796	494.582	Proteasome&Peptidase
Q9JMD0	Znf207	ZN207_MOUSE	Q9JMD0	BUB3-interacting and GLEBS motif-containing protein ZNF207 (BuGZ) (49 kDa zinc finger protein) (Zinc finger protein 207)	Znf207 Bugz Zep Zfp207	FUNCTION: Kinetochore- and microtubule-binding protein that plays a key role in spindle assembly. ZNF207/BuGZ is mainly composed of disordered low-complexity regions and undergoes phase transition or coacervation to form temperature-dependent liquid droplets. Coacervation promotes microtubule bundling and concentrates tubulin, promoting microtubule polymerization and assembly of spindle and spind…	Alternative splicing;Cell cycle;Cell division;Centromere;Chromosome;Chromosome partition;Cytoplasm;Cytoskeleton;Kinetochore;Metal-binding;Microtubule;Mitosis;Nucleus;Reference proteome;Repeat;Zinc;Zinc-finger	attachment of spindle microtubules to kinetochore [GO:0008608]; cell division [GO:0051301]; microtubule bundle formation [GO:0001578]; microtubule polymerization [GO:0046785]; mitotic sister chromatid segregation [GO:0000070]; mitotic spindle assembly [GO:0090307]; mitotic spindle assembly checkpoint signaling [GO:0007094]; protein stabilization [GO:0050821]; regulation of chromosome segregation …	heparin binding [GO:0008201]; metal ion binding [GO:0046872]; microtubule binding [GO:0008017]	cytoplasm [GO:0005737]; kinetochore [GO:0000776]; microtubule [GO:0005874]; nucleolus [GO:0005730]; nucleoplasm [GO:0005654]; nucleus [GO:0005634]; spindle [GO:0005819]; spindle matrix [GO:1990047]		1556.34	1427.79	1328.75	1177.21	1552.92	1343.01	1786.28	1603.45	1616.32	1393.25	1472.34	1626.01	Proteasome&Peptidase
Q9QUR6	Prep	PPCE_MOUSE	Q9QUR6	Prolyl endopeptidase (PE) (EC 3.4.21.26) (Post-proline cleaving enzyme)	Prep Pep	FUNCTION: Cleaves peptide bonds on the C-terminal side of prolyl residues within peptides that are up to approximately 30 amino acids long.	Acetylation;Cytoplasm;Hydrolase;Protease;Reference proteome;Serine protease	protein catabolic process [GO:0030163]; protein metabolic process [GO:0019538]; proteolysis [GO:0006508]	endopeptidase activity [GO:0004175]; oligopeptidase activity [GO:0070012]; peptide binding [GO:0042277]; serine-type endopeptidase activity [GO:0004252]	cytoplasm [GO:0005737]; cytosol [GO:0005829]; nucleus [GO:0005634]		1412.2	1431.27	1364.14	1234.48	1294.82	1315.22	1351.96	1186	1243.24	1255.45	1228.33	1301.67	Proteasome&Peptidase
Q9QXE7	Tbl1x	TBL1X_MOUSE	Q9QXE7	F-box-like/WD repeat-containing protein TBL1X (Transducin beta-like protein 1X)	Tbl1x Tbl1	FUNCTION: F-box-like protein involved in the recruitment of the ubiquitin/19S proteasome complex to nuclear receptor-regulated transcription units. Plays an essential role in transcription activation mediated by nuclear receptors. Probably acts as integral component of corepressor complexes that mediates the recruitment of the 19S proteasome complex, leading to the subsequent proteasomal degradat…	Acetylation;Activator;Isopeptide bond;Nucleus;Reference proteome;Repeat;Transcription;Transcription regulation;Ubl conjugation;Ubl conjugation pathway;WD repeat	fat cell differentiation [GO:0045444]; histone deacetylation [GO:0016575]; negative regulation of DNA-templated transcription [GO:0045892]; positive regulation of transcription by RNA polymerase II [GO:0045944]; proteasome-mediated ubiquitin-dependent protein catabolic process [GO:0043161]; protein stabilization [GO:0050821]; regulation of transcription by RNA polymerase II [GO:0006357]; response…	chromatin binding [GO:0003682]; DNA binding [GO:0003677]; histone binding [GO:0042393]; identical protein binding [GO:0042802]; transcription cis-regulatory region binding [GO:0000976]; transcription corepressor activity [GO:0003714]	histone deacetylase complex [GO:0000118]; mitotic spindle [GO:0072686]; nucleoplasm [GO:0005654]; nucleus [GO:0005634]; transcription regulator complex [GO:0005667]; transcription repressor complex [GO:0017053]		317.71	364.354	323.239	329.034	267.665	299.406	272.35	290.983	312.777	336.694	256.754	338.294	Proteasome&Peptidase
Q9QZM0	Ubqln2	UBQL2_MOUSE	Q9QZM0	Ubiquilin-2 (Chap1) (DSK2 homolog) (Protein linking IAP with cytoskeleton 2) (PLIC-2) (Ubiquitin-like product Chap1/Dsk2)	Ubqln2 Plic2	FUNCTION: Plays an important role in the regulation of different protein degradation mechanisms and pathways including ubiquitin-proteasome system (UPS), autophagy and the endoplasmic reticulum-associated protein degradation (ERAD) pathway. Mediates the proteasomal targeting of misfolded or accumulated proteins for degradation by binding (via UBA domain) to their polyubiquitin chains and by inter…	Acetylation;Autophagy;Cytoplasm;Cytoplasmic vesicle;Membrane;Nucleus;Phosphoprotein;Reference proteome;Repeat	autophagosome assembly [GO:0000045]; negative regulation of clathrin-dependent endocytosis [GO:1900186]; negative regulation of G protein-coupled receptor internalization [GO:1904021]; positive regulation of ER-associated ubiquitin-dependent protein catabolic process [GO:1903071]; regulation of autophagosome assembly [GO:2000785]; regulation of macroautophagy [GO:0016241]; ubiquitin-dependent ERA…	identical protein binding [GO:0042802]; molecular condensate scaffold activity [GO:0140693]; polyubiquitin modification-dependent protein binding [GO:0031593]	autophagosome [GO:0005776]; cytoplasm [GO:0005737]; cytoplasmic vesicle [GO:0031410]; cytosol [GO:0005829]; nucleus [GO:0005634]; plasma membrane [GO:0005886]		3758.51	3739.73	3601.6	3521.25	4124.25	3930.06	3776.56	3557.23	3739.91	3486.17	3639.41	3739.92	Proteasome&Peptidase
Q9WUB0	Rbck1	HOIL1_MOUSE	Q9WUB0	RanBP-type and C3HC4-type zinc finger-containing protein 1 (EC 2.3.2.31) (Heme-oxidized IRP2 ubiquitin ligase 1 homolog) (HOIL-1) (RING-type E3 ubiquitin transferase HOIL-1) (UbcM4-interacting protein 28) (Ubiquitin-conjugating enzyme 7-interacting protein 3)	Rbck1 Rbck Ubce7ip3 Uip28	FUNCTION: E3 ubiquitin-protein ligase, which accepts ubiquitin from specific E2 ubiquitin-conjugating enzymes, such as UBE2L3/UBCM4, and then transfers it to substrates. Functions as an E3 ligase for oxidized IREB2 and both heme and oxygen are necessary for IREB2 ubiquitination. Promotes ubiquitination of TAB2 and IRF3 and their degradation by the proteasome. Component of the LUBAC complex which …	3D-structure;Acetylation;Coiled coil;Metal-binding;Phosphoprotein;Reference proteome;Repeat;Transferase;Ubl conjugation;Ubl conjugation pathway;Zinc;Zinc-finger	cytoplasmic sequestering of protein [GO:0051220]; defense response to bacterium [GO:0042742]; negative regulation of necroptotic process [GO:0060546]; negative regulation of NF-kappaB transcription factor activity [GO:0032088]; positive regulation of apoptotic process [GO:0043065]; positive regulation of extrinsic apoptotic signaling pathway [GO:2001238]; positive regulation of I-kappaB kinase/NF…	double-stranded DNA binding [GO:0003690]; identical protein binding [GO:0042802]; metal ion binding [GO:0046872]; protein kinase C binding [GO:0005080]; protein sequestering activity [GO:0140311]; transcription coactivator activity [GO:0003713]; ubiquitin binding [GO:0043130]; ubiquitin-protein transferase activity [GO:0004842]	LUBAC complex [GO:0071797]		154.731	131.348	86.407	111.948	104.591	86.4671	138.044	158.202	157.532	174.379	188.368	160.089	Proteasome&Peptidase
O09061	Psmb1	PSB1_MOUSE	O09061	Proteasome subunit beta type-1 (Macropain subunit C5) (Multicatalytic endopeptidase complex subunit C5) (Proteasome component C5) (Proteasome gamma chain)	Psmb1	FUNCTION: Non-catalytic component of the 20S core proteasome complex involved in the proteolytic degradation of most intracellular proteins. This complex plays numerous essential roles within the cell by associating with different regulatory particles. Associated with two 19S regulatory particles, forms the 26S proteasome and thus participates in the ATP-dependent degradation of ubiquitinated pro…	3D-structure;Acetylation;Cytoplasm;Direct protein sequencing;Glycoprotein;Nucleus;Phosphoprotein;Proteasome;Reference proteome	proteolysis involved in protein catabolic process [GO:0051603]		cytoplasm [GO:0005737]; cytosol [GO:0005829]; nucleoplasm [GO:0005654]; nucleus [GO:0005634]; proteasome complex [GO:0000502]; proteasome core complex [GO:0005839]; proteasome core complex, beta-subunit complex [GO:0019774]		3884.16	3477.35	3174.33	3532.2	3835.14	3325.29	3645.05	3464.13	3405.06	3293.44	3264.96	3200.03	IFN signaling
O35593	Psmd14	PSDE_MOUSE	O35593	26S proteasome non-ATPase regulatory subunit 14 (EC 3.4.19.-) (26S proteasome regulatory subunit RPN11) (MAD1)	Psmd14 Pad1	FUNCTION: Component of the 26S proteasome, a multiprotein complex involved in the ATP-dependent degradation of ubiquitinated proteins. This complex plays a key role in the maintenance of protein homeostasis by removing misfolded or damaged proteins, which could impair cellular functions, and by removing proteins whose functions are no longer required. Therefore, the proteasome participates in num…	Direct protein sequencing;DNA damage;DNA repair;Hydrolase;Metal-binding;Metalloprotease;Phosphoprotein;Protease;Proteasome;Reference proteome;Ubl conjugation pathway;Zinc	double-strand break repair via homologous recombination [GO:0000724]; double-strand break repair via nonhomologous end joining [GO:0006303]; proteasome-mediated ubiquitin-dependent protein catabolic process [GO:0043161]; protein deubiquitination [GO:0016579]; protein K63-linked deubiquitination [GO:0070536]; regulation of proteasomal protein catabolic process [GO:0061136]; response to ethanol [GO…	endopeptidase activator activity [GO:0061133]; endopeptidase activity [GO:0004175]; metal ion binding [GO:0046872]; metal-dependent deubiquitinase activity [GO:0140492]; metallopeptidase activity [GO:0008237]; proteasome binding [GO:0070628]	cytosolic proteasome complex [GO:0031597]; proteasome accessory complex [GO:0022624]; proteasome complex [GO:0000502]; proteasome regulatory particle, lid subcomplex [GO:0008541]		2465.56	2621.68	2692.59	2882.87	2921.3	2657.46	2294.16	2415.42	2274.02	2105.31	2110.16	1981.86	IFN signaling&proteasome complex&proteasome regulatory particle&proteasome accessory complex
O89110	Casp8	A0A087WQT6_MOUSE;CASP8_MOUSE	O89110	Caspase-8 (CASP-8) (EC 3.4.22.61) [Cleaved into: Caspase-8 subunit p18; Caspase-8 subunit p10]	Casp8	FUNCTION: Thiol protease that plays a key role in programmed cell death by acting as a molecular switch for apoptosis, necroptosis and pyroptosis, and is required to prevent tissue damage during embryonic development and adulthood (PubMed:12065591, PubMed:18455983, PubMed:30361383, PubMed:30381458, PubMed:31511692, PubMed:31748744, PubMed:33397971). Initiator protease that induces extrinsic apopt…	Acetylation;Apoptosis;Cytoplasm;Hydrolase;Nucleus;Phosphoprotein;Protease;Reference proteome;Repeat;Thiol protease;Zymogen	activation of cysteine-type endopeptidase activity [GO:0097202]; activation of cysteine-type endopeptidase activity involved in apoptotic process [GO:0006919]; angiogenesis [GO:0001525]; apoptotic process [GO:0006915]; apoptotic signaling pathway [GO:0097190]; cardiac muscle tissue development [GO:0048738]; execution phase of apoptosis [GO:0097194]; extrinsic apoptotic signaling pathway [GO:00971…	cysteine-type endopeptidase activity [GO:0004197]; cysteine-type endopeptidase activity involved in apoptotic process [GO:0097153]; cysteine-type endopeptidase activity involved in apoptotic signaling pathway [GO:0097199]; death effector domain binding [GO:0035877]; death receptor binding [GO:0005123]; endopeptidase activity [GO:0004175]; identical protein binding [GO:0042802]; peptidase activity…	caspase complex [GO:0008303]; CD95 death-inducing signaling complex [GO:0031265]; cell body [GO:0044297]; cytoplasm [GO:0005737]; cytosol [GO:0005829]; death-inducing signaling complex [GO:0031264]; membrane raft [GO:0045121]; mitochondrion [GO:0005739]; neuron projection [GO:0043005]; Noc1p-Noc2p complex [GO:0030690]; nucleoplasm [GO:0005654]; nucleus [GO:0005634]; plasma membrane [GO:0005886]; …		449.063	459.64	423.642	439.148	451.544	433.886	418.4	447.447	455.791	462.106	469.991	441.475	IFN signaling
Q8C3V4	Stat1	A0A087WSP5_MOUSE;STAT1_MOUSE;Q8C3V4_MOUSE	Q8C3V4	Signal transducer and activator of transcription	Stat1		Activator;Coiled coil;Cytoplasm;DNA-binding;Nucleus;Phosphoprotein;Proteomics identification;Reference proteome;SH2 domain;Transcription;Transcription regulation	cytokine-mediated signaling pathway [GO:0019221]	DNA binding [GO:0003677]; DNA-binding transcription factor activity [GO:0003700]	cytoplasm [GO:0005737]; nucleus [GO:0005634]		1228.23	1204.44	1036.22	1086.99	1232.5	1199.46	1242.66	1109.07	1298.43	1242.55	1126.92	1304.44	IFN signaling
O35451	Atf6b	A0A0A0MQ69_MOUSE;G3UX19_MOUSE;ATF6B_MOUSE	O35451	Cyclic AMP-dependent transcription factor ATF-6 beta (cAMP-dependent transcription factor ATF-6 beta) (Activating transcription factor 6 beta) (ATF6-beta) (cAMP response element-binding protein-related protein) (Creb-rp) (cAMP-responsive element-binding protein-like 1) [Cleaved into: Processed cyclic AMP-dependent transcription factor ATF-6 beta]	Atf6b Crebl1	FUNCTION: [Cyclic AMP-dependent transcription factor ATF-6 beta]: Precursor of the transcription factor form (Processed cyclic AMP-dependent transcription factor ATF-6 beta), which is embedded in the endoplasmic reticulum membrane. Endoplasmic reticulum stress promotes processing of this form, releasing the transcription factor form that translocates into the nucleus, where it activates transcrip…	Acetylation;Activator;DNA-binding;Endoplasmic reticulum;Glycoprotein;Membrane;Nucleus;Reference proteome;Signal-anchor;Transcription;Transcription regulation;Transmembrane;Transmembrane helix;Unfolded protein response	endoplasmic reticulum unfolded protein response [GO:0030968]; mitotic chromosome condensation [GO:0007076]; negative regulation of ATF6-mediated unfolded protein response [GO:1903892]; negative regulation of gene expression [GO:0010629]; positive regulation of transcription by RNA polymerase II [GO:0045944]; positive regulation of transcription from RNA polymerase II promoter in response to endop…	DNA-binding transcription activator activity, RNA polymerase II-specific [GO:0001228]; DNA-binding transcription factor activity [GO:0003700]; DNA-binding transcription factor activity, RNA polymerase II-specific [GO:0000981]; RNA polymerase II cis-regulatory region sequence-specific DNA binding [GO:0000978]; sequence-specific double-stranded DNA binding [GO:1990837]; transcription cis-regulatory…	condensed nuclear chromosome [GO:0000794]; early endosome [GO:0005769]; endomembrane system [GO:0012505]; endoplasmic reticulum membrane [GO:0005789]; microtubule organizing center [GO:0005815]; nuclear matrix [GO:0016363]; nucleus [GO:0005634]; protein-DNA complex [GO:0032993]; RNA polymerase II transcription regulator complex [GO:0090575]		1688.34	1720.01	1684.64	1479.63	1276.62	1336.66	1200.43	1325.49	1497.57	1478.47	1372.41	1284.28	IFN signaling
Q91W98	Slc15a4	A0A0G2JDS1_MOUSE;D3Z4X0_MOUSE;S15A4_MOUSE	Q91W98	Solute carrier family 15 member 4 (Peptide/histidine transporter 1)	Slc15a4 Pht1	FUNCTION: Proton-coupled amino-acid transporter that mediates the transmembrane transport of L-histidine and some di- and tripeptides from inside the lysosome to the cytosol, and plays a key role in innate immune response (PubMed:19570976, PubMed:21277849, PubMed:25238095, PubMed:27845049, PubMed:29305823). Able to transport a variety of di- and tripeptides, including carnosine and some peptidogl…	Endosome;Immunity;Innate immunity;Lysosome;Membrane;Peptide transport;Phosphoprotein;Protein transport;Reference proteome;Symport;Transmembrane;Transmembrane helix;Transport	dipeptide import across plasma membrane [GO:0140206]; histidine transport [GO:0015817]; innate immune response [GO:0045087]; L-histidine transmembrane export from vacuole [GO:0089708]; mast cell homeostasis [GO:0033023]; peptidoglycan transport [GO:0015835]; positive regulation of innate immune response [GO:0045089]; positive regulation of nucleotide-binding oligomerization domain containing 1 si…	dipeptide transmembrane transporter activity [GO:0071916]; L-histidine transmembrane transporter activity [GO:0005290]; peptide:proton symporter activity [GO:0015333]; peptidoglycan transmembrane transporter activity [GO:0015647]	early endosome membrane [GO:0031901]; endolysosome membrane [GO:0036020]; endosome membrane [GO:0010008]; lysosomal membrane [GO:0005765]; membrane [GO:0016020]		318.6	360.218	277.286	366.849	330.821	321.098	290.712	278.286	470.512	474.887	591.204	457.08	IFN signaling
Q8C3P7	Mettl3	A0A0R4J041_MOUSE;MTA70_MOUSE	Q8C3P7	N6-adenosine-methyltransferase subunit METTL3 (EC 2.1.1.348) (Methyltransferase-like protein 3) (N6-adenosine-methyltransferase 70 kDa subunit) (MT-A70)	Mettl3 Mta70	FUNCTION: The METTL3-METTL14 heterodimer forms a N6-methyltransferase complex that methylates adenosine residues at the N(6) position of some RNAs and regulates various processes such as the circadian clock, differentiation of embryonic and hematopoietic stem cells, cortical neurogenesis, response to DNA damage, differentiation of T-cells and primary miRNA processing (PubMed:25456834, PubMed:2439…	Acetylation;Alternative splicing;Biological rhythms;Cytoplasm;Differentiation;DNA damage;Immunity;Innate immunity;Isopeptide bond;Methyltransferase;Nucleus;Oogenesis;Phosphoprotein;Reference proteome;RNA-binding;S-adenosyl-L-methionine;Spermatogenesis;Transferase;Ubl conjugation	adenosine to inosine editing [GO:0006382]; cellular response to UV [GO:0034644]; circadian rhythm [GO:0007623]; DNA damage response [GO:0006974]; dosage compensation by inactivation of X chromosome [GO:0009048]; endothelial to hematopoietic transition [GO:0098508]; forebrain radial glial cell differentiation [GO:0021861]; gliogenesis [GO:0042063]; innate immune response [GO:0045087]; mRNA catabol…	mRNA (2'-O-methyladenosine-N6-)-methyltransferase activity [GO:0016422]; mRNA (N6-adenosine)-methyltransferase activity [GO:0001734]; mRNA binding [GO:0003729]; protein heterodimerization activity [GO:0046982]; RNA methyltransferase activity [GO:0008173]; S-adenosyl-L-methionine binding [GO:1904047]	cytosol [GO:0005829]; Golgi apparatus [GO:0005794]; nuclear body [GO:0016604]; nuclear speck [GO:0016607]; nucleoplasm [GO:0005654]; nucleus [GO:0005634]; RNA N6-methyladenosine methyltransferase complex [GO:0036396]		591.898	446.729	528.519	550.312	484.075	520.97	530.595	496.113	532.799	582.59	673.169	756.084	IFN signaling
Q5D0E0	Ikbkb	A0A0R4J0T4_MOUSE;Q5D0E0_MOUSE	Q5D0E0	IkappaB kinase (EC 2.7.11.10)	Ikbkb IKK-2 IKK-beta IKK2 IKK[b]		Kinase;Phosphoprotein;Proteomics identification;Reference proteome;Serine/threonine-protein kinase;Transferase	cortical actin cytoskeleton organization [GO:0030866]; interleukin-1-mediated signaling pathway [GO:0070498]; negative regulation of bicellular tight junction assembly [GO:1903347]; negative regulation of myosin-light-chain-phosphatase activity [GO:0035509]; peptidyl-serine phosphorylation [GO:0018105]; positive regulation of I-kappaB kinase/NF-kappaB signaling [GO:0043123]; positive regulation o…	ATP binding [GO:0005524]; IkappaB kinase activity [GO:0008384]; protein heterodimerization activity [GO:0046982]; protein homodimerization activity [GO:0042803]; protein kinase binding [GO:0019901]; scaffold protein binding [GO:0097110]; transferrin receptor binding [GO:1990459]	cytosol [GO:0005829]; nucleus [GO:0005634]		458.934	397.967	365.29	379.642	358.641	365.647	377.859	403.61	438.298	475.405	467.938	475.204	IFN signaling
P23906	Irf2	A0A140LHP8_MOUSE;A0A140LIX2_MOUSE;A0A140LJA4_MOUSE;A0A1B0GQW5_MOUSE;A0A1B0GQZ7_MOUSE;IRF2_MOUSE	P23906	Interferon regulatory factor 2 (IRF-2)	Irf2	FUNCTION: Specifically binds to the upstream regulatory region of type I IFN and IFN-inducible MHC class I genes (the interferon consensus sequence (ICS)) and represses those genes. Also acts as an activator for several genes including H4 and IL7. Constitutively binds to the ISRE promoter to activate IL7. Involved in cell cycle regulation through binding the site II (HiNF-M) promoter region of H4…	3D-structure;Acetylation;Activator;Direct protein sequencing;DNA-binding;Isopeptide bond;Nucleus;Phosphoprotein;Reference proteome;Repressor;Transcription;Transcription regulation;Ubl conjugation	defense response to virus [GO:0051607]; immune system process [GO:0002376]; positive regulation of transcription by RNA polymerase II [GO:0045944]; regulation of DNA-templated transcription [GO:0006355]; regulation of transcription by RNA polymerase II [GO:0006357]	DNA binding [GO:0003677]; DNA-binding transcription activator activity, RNA polymerase II-specific [GO:0001228]; DNA-binding transcription factor activity [GO:0003700]; DNA-binding transcription factor activity, RNA polymerase II-specific [GO:0000981]; RNA polymerase II cis-regulatory region sequence-specific DNA binding [GO:0000978]; RNA polymerase II transcription regulatory region sequence-spe…	cytosol [GO:0005829]; focal adhesion [GO:0005925]; nucleoplasm [GO:0005654]; nucleus [GO:0005634]		123.043	121.342	84.1769	94.9367	108.036	63.6593	166.735	147.91	157.983	182.694	226.199	NaN	IFN signaling
P70671	Irf3	A0A140LJE8_MOUSE;IRF3_MOUSE	P70671	Interferon regulatory factor 3 (IRF-3)	Irf3	FUNCTION: Key transcriptional regulator of type I interferon (IFN)-dependent immune responses which plays a critical role in the innate immune response against DNA and RNA viruses (PubMed:15800576). Regulates the transcription of type I IFN genes (IFN-alpha and IFN-beta) and IFN-stimulated genes (ISG) by binding to an interferon-stimulated response element (ISRE) in their promoters (PubMed:158005…	3D-structure;Activator;Antiviral defense;Cytoplasm;DNA-binding;Immunity;Innate immunity;Isopeptide bond;Mitochondrion;Nucleus;Phosphoprotein;Reference proteome;Transcription;Transcription regulation;Ubl conjugation	cellular response to lipopolysaccharide [GO:0071222]; cellular response to virus [GO:0098586]; cytosolic pattern recognition receptor signaling pathway [GO:0002753]; defense response to virus [GO:0051607]; immune system process [GO:0002376]; lipopolysaccharide-mediated signaling pathway [GO:0031663]; mRNA transcription [GO:0009299]; positive regulation of cytokine production [GO:0001819]; positiv…	DNA-binding transcription activator activity [GO:0001216]; DNA-binding transcription activator activity, RNA polymerase II-specific [GO:0001228]; DNA-binding transcription factor activity [GO:0003700]; DNA-binding transcription factor activity, RNA polymerase II-specific [GO:0000981]; identical protein binding [GO:0042802]; molecular function activator activity [GO:0140677]; promoter-specific chr…	chromatin [GO:0000785]; cytoplasm [GO:0005737]; cytosol [GO:0005829]; mitochondrion [GO:0005739]; nucleus [GO:0005634]		937.456	952.375	745.554	913.321	765.996	940.364	1175.8	1070.1	1234.39	1020.33	973.404	1048.67	IFN signaling
Z4YJJ5	Cyld	A0A1B0GSE5_MOUSE;CYLD_MOUSE;Z4YJJ5_MOUSE	Z4YJJ5	Ubiquitin carboxyl-terminal hydrolase CYLD (EC 3.4.19.12) (Deubiquitinating enzyme CYLD) (Ubiquitin thioesterase CYLD) (Ubiquitin-specific-processing protease CYLD)	Cyld		Cell membrane;Cell projection;Hydrolase;Immunity;Innate immunity;Membrane;Protease;Proteomics identification;Reference proteome;Thiol protease;Ubl conjugation;Ubl conjugation pathway;Wnt signaling pathway	innate immune response [GO:0045087]; negative regulation of canonical Wnt signaling pathway [GO:0090090]; negative regulation of JNK cascade [GO:0046329]; negative regulation of NF-kappaB transcription factor activity [GO:0032088]; negative regulation of NIK/NF-kappaB signaling [GO:1901223]; negative regulation of p38MAPK cascade [GO:1903753]; positive regulation of extrinsic apoptotic signaling …	cysteine-type deubiquitinase activity [GO:0004843]; K63-linked deubiquitinase activity [GO:0061578]; proline-rich region binding [GO:0070064]; protein kinase binding [GO:0019901]; zinc ion binding [GO:0008270]	cell projection [GO:0042995]; centrosome [GO:0005813]; cytoplasmic microtubule [GO:0005881]; cytoplasmic side of plasma membrane [GO:0009898]; cytosol [GO:0005829]; midbody [GO:0030496]; perinuclear region of cytoplasm [GO:0048471]; spindle [GO:0005819]		144.242	170.027	172.807	174.697	168.848	176.978	102.456	146.875	178.59	171.703	73.2095	120.534	IFN signaling
Q91W67	Ubl7	A0A1L1SRT5_MOUSE;A0A1L1SRW2_MOUSE;A0A1L1STF2_MOUSE;A0A1L1SU68_MOUSE;UBL7_MOUSE	Q91W67	Ubiquitin-like protein 7	Ubl7	FUNCTION: Interferon-stimulated protein that positively regulates RNA virus-triggered innate immune signaling. Mechanistically, promotes 'Lys-27'-linked polyubiquitination of MAVS through TRIM21 leading to enhanced the IFN signaling pathway. {ECO:0000250|UniProtKB:Q96S82}.	3D-structure;Immunity;Innate immunity;Phosphoprotein;Reference proteome;Ubl conjugation pathway	ubiquitin-dependent protein catabolic process [GO:0006511]	polyubiquitin modification-dependent protein binding [GO:0031593]	cytosol [GO:0005829]		1761.19	1719.55	1608.44	1885.96	1634.52	1566.56	1519.21	1712.13	1437.96	1585.48	1558.28	1533.68	IFN signaling
Q8CBR3	Fancc	A0A1Y7VKS5_MOUSE;E9QAE8_MOUSE;F7DEE2_MOUSE;FANCC_MOUSE;Q8CBR3_MOUSE	Q8CBR3	Fanconi anemia group C protein homolog (Protein FACC)	Fancc	FUNCTION: DNA repair protein that may operate in a postreplication repair or a cell cycle checkpoint function. May be implicated in interstrand DNA cross-link repair and in the maintenance of normal chromosome stability. Upon IFNG induction, may facilitate STAT1 activation by recruiting STAT1 to IFNGR1. {ECO:0000256|PIRNR:PIRNR018417}.	Cytoplasm;DNA damage;DNA repair;Nucleus;Reference proteome	interstrand cross-link repair [GO:0036297]		cytoplasm [GO:0005737]; Fanconi anaemia nuclear complex [GO:0043240]		NaN	NaN	NaN	NaN	NaN	NaN	106.626	156.296	NaN	NaN	NaN	NaN	IFN signaling
A0A286YDL6	Camk2g	A0A286YDL6_MOUSE	A0A286YDL6	Calcium/calmodulin-dependent protein kinase II gamma	Camk2g		Proteomics identification;Reference proteome	protein phosphorylation [GO:0006468]	ATP binding [GO:0005524]; calmodulin binding [GO:0005516]; calmodulin-dependent protein kinase activity [GO:0004683]	organelle [GO:0043226]		131.952	113.362	95.2932	146.19	118.624	137.488	172.398	125.615	167.79	119.804	155.648	137.65	IFN signaling
Q5SZ99	Trim38	A0A286YDR5_MOUSE;Q5SZ99_MOUSE	Q5SZ99	E3 ubiquitin-protein ligase TRIM38 (EC 2.3.2.27) (E3 SUMO-protein ligase TRIM38) (EC 2.3.2.-) (Tripartite motif-containing protein 38)	Trim38	FUNCTION: E3 ubiquitin-protein and E3 SUMO-protein ligase that acts as a regulator of innate immunity (PubMed:22539786, PubMed:26392463, PubMed:27637147). Acts as a negative regulator of type I interferon IFN-beta production by catalyzing 'Lys-48'-linked polyubiquitination of AZI2/NAP1, leading to its degradation (PubMed:22539786). Mediates 'Lys-48'-linked polyubiquitination and proteasomal degra…	Cytoplasm;Immunity;Innate immunity;Metal-binding;Reference proteome;Transferase;Ubl conjugation pathway;Zinc;Zinc-finger	innate immune response [GO:0045087]; negative regulation of defense response to virus [GO:0050687]; positive regulation of autophagy [GO:0010508]; positive regulation of DNA-binding transcription factor activity [GO:0051091]; positive regulation of I-kappaB kinase/NF-kappaB signaling [GO:0043123]; positive regulation of NF-kappaB transcription factor activity [GO:0051092]; positive regulation of …	protein homodimerization activity [GO:0042803]; protein kinase binding [GO:0019901]; transcription coactivator activity [GO:0003713]; ubiquitin protein ligase activity [GO:0061630]; zinc ion binding [GO:0008270]	cytoplasm [GO:0005737]; cytosol [GO:0005829]; nucleoplasm [GO:0005654]	PATHWAY: Protein modification; protein ubiquitination. {ECO:0000269|PubMed:22539786, ECO:0000269|PubMed:26392463}.; PATHWAY: Protein modification; protein sumoylation. {ECO:0000269|PubMed:27637147}.	NaN	NaN	NaN	NaN	NaN	NaN	NaN	NaN	59.5872	37.0698	NaN	NaN	IFN signaling
O35732	Cflar	A0A2C9F2D9_MOUSE;CFLAR_MOUSE	O35732	CASP8 and FADD-like apoptosis regulator (Caspase homolog) (CASH) (Caspase-eight-related protein) (Casper) (Caspase-like apoptosis regulatory protein) (CLARP) (Cellular FLICE-like inhibitory protein) (c-FLIP) (FADD-like antiapoptotic molecule 1) (FLAME-1) (Inhibitor of FLICE) (I-FLICE) (MACH-related inducer of toxicity) (MRIT) (Usurpin) [Cleaved into: CASP8 and FADD-like apoptosis regulator subuni…	Cflar Cash	FUNCTION: Apoptosis regulator protein which may function as a crucial link between cell survival and cell death pathways in mammalian cells. Acts as an inhibitor of TNFRSF6 mediated apoptosis. A proteolytic fragment (p43) is likely retained in the death-inducing signaling complex (DISC) thereby blocking further recruitment and processing of caspase-8 at the complex. Full length and shorter isofor…	Alternative splicing;Apoptosis;Reference proteome;Repeat	apoptotic process [GO:0006915]; cellular response to nitric oxide [GO:0071732]; erythrocyte differentiation [GO:0030218]; keratinocyte differentiation [GO:0030216]; necroptotic process [GO:0070266]; negative regulation of apoptotic process [GO:0043066]; negative regulation of cardiac muscle cell apoptotic process [GO:0010667]; negative regulation of cellular response to transforming growth factor…	cysteine-type endopeptidase activity involved in apoptotic process [GO:0097153]; death receptor binding [GO:0005123]; enzyme activator activity [GO:0008047]; peptidase activator activity [GO:0016504]; protease binding [GO:0002020]; protein-containing complex binding [GO:0044877]	CD95 death-inducing signaling complex [GO:0031265]; cytoplasm [GO:0005737]; death-inducing signaling complex [GO:0031264]; membrane raft [GO:0045121]; ripoptosome [GO:0097342]		207.333	208.356	202.688	45.9024	85.9291	63.9322	86.7697	83.8813	129.697	151.101	163.332	153.999	IFN signaling
Q923T9	Camk2g	A0A2I3BQP6_MOUSE;KCC2G_MOUSE	Q923T9	Calcium/calmodulin-dependent protein kinase type II subunit gamma (CaM kinase II subunit gamma) (CaMK-II subunit gamma) (EC 2.7.11.17)	Camk2g	FUNCTION: Calcium/calmodulin-dependent protein kinase that functions autonomously after Ca(2+)/calmodulin-binding and autophosphorylation, and is involved in sarcoplasmic reticulum Ca(2+) transport in skeletal muscle and may function in dendritic spine and synapse formation and neuronal plasticity (By similarity). In slow-twitch muscles, is involved in regulation of sarcoplasmic reticulum (SR) Ca…	Alternative splicing;ATP-binding;Calmodulin-binding;Developmental protein;Differentiation;Kinase;Membrane;Neurogenesis;Nucleotide-binding;Phosphoprotein;Reference proteome;Sarcoplasmic reticulum;Serine/threonine-protein kinase;Transferase	calcium ion transport [GO:0006816]; cell differentiation [GO:0030154]; G1/S transition of mitotic cell cycle [GO:0000082]; nervous system development [GO:0007399]; protein autophosphorylation [GO:0046777]; regulation of neuron projection development [GO:0010975]; regulation of protein localization to plasma membrane [GO:1903076]; regulation of relaxation of cardiac muscle [GO:1901897]; response t…	ATP binding [GO:0005524]; calmodulin binding [GO:0005516]; calmodulin-dependent protein kinase activity [GO:0004683]; identical protein binding [GO:0042802]; protein homodimerization activity [GO:0042803]; protein serine kinase activity [GO:0106310]; protein serine/threonine kinase activity [GO:0004674]	calcium- and calmodulin-dependent protein kinase complex [GO:0005954]; cytoplasm [GO:0005737]; neuron projection [GO:0043005]; postsynaptic density [GO:0014069]; sarcoplasmic reticulum membrane [GO:0033017]		374.507	318.859	305.929	294.536	274.173	259.95	248.683	219.042	238.587	275.622	300.274	386.12	IFN signaling
Q04207	Rela	A0A494BA44_MOUSE;TF65_MOUSE	Q04207	Transcription factor p65 (Nuclear factor NF-kappa-B p65 subunit) (Nuclear factor of kappa light polypeptide gene enhancer in B-cells 3)	Rela Nfkb3	FUNCTION: NF-kappa-B is a pleiotropic transcription factor present in almost all cell types and is the endpoint of a series of signal transduction events that are initiated by a vast array of stimuli related to many biological processes such as inflammation, immunity, differentiation, cell growth, tumorigenesis and apoptosis. NF-kappa-B is a homo- or heterodimeric complex formed by the Rel-like d…	3D-structure;Acetylation;Activator;Alternative splicing;Cytoplasm;DNA-binding;Isopeptide bond;Methylation;Nucleus;Phosphoprotein;Reference proteome;S-nitrosylation;Transcription;Transcription regulation;Ubl conjugation	animal organ morphogenesis [GO:0009887]; cellular response to angiotensin [GO:1904385]; cellular response to hepatocyte growth factor stimulus [GO:0035729]; cellular response to hydrogen peroxide [GO:0070301]; cellular response to interleukin-1 [GO:0071347]; cellular response to interleukin-6 [GO:0071354]; cellular response to lipopolysaccharide [GO:0071222]; cellular response to lipoteichoic aci…	actinin binding [GO:0042805]; ankyrin repeat binding [GO:0071532]; chromatin binding [GO:0003682]; chromatin DNA binding [GO:0031490]; DNA binding [GO:0003677]; DNA-binding transcription activator activity, RNA polymerase II-specific [GO:0001228]; DNA-binding transcription factor activity [GO:0003700]; DNA-binding transcription factor activity, RNA polymerase II-specific [GO:0000981]; DNA-binding…	chromatin [GO:0000785]; cytoplasm [GO:0005737]; cytosol [GO:0005829]; glutamatergic synapse [GO:0098978]; NF-kappaB complex [GO:0071159]; NF-kappaB p50/p65 complex [GO:0035525]; nucleus [GO:0005634]; protein-containing complex [GO:0032991]; synapse [GO:0045202]; transcription regulator complex [GO:0005667]		1142.37	1160.47	1067.98	975.722	1139.28	1142.86	961.802	949.67	1009.35	1284.3	1286.84	1236.15	IFN signaling
P25446	Fas	A0A494BBP5_MOUSE;TNR6_MOUSE	P25446	Tumor necrosis factor receptor superfamily member 6 (Apo-1 antigen) (Apoptosis-mediating surface antigen FAS) (FASLG receptor) (CD antigen CD95)	Fas Apt1 Tnfrsf6	FUNCTION: Receptor for TNFSF6/FASLG. The adapter molecule FADD recruits caspase-8 to the activated receptor. The resulting death-inducing signaling complex (DISC) performs caspase-8 proteolytic activation which initiates the subsequent cascade of caspases (aspartate-specific cysteine proteases) mediating apoptosis. FAS-mediated apoptosis may have a role in the induction of peripheral tolerance, i…	3D-structure;Apoptosis;Calmodulin-binding;Cell membrane;Disease variant;Disulfide bond;Glycoprotein;Lipoprotein;Membrane;Palmitate;Phosphoprotein;Receptor;Reference proteome;Repeat;Signal;Transmembrane;Transmembrane helix	activation-induced cell death of T cells [GO:0006924]; apoptotic process [GO:0006915]; apoptotic signaling pathway [GO:0097190]; B cell mediated immunity [GO:0019724]; cellular response to amino acid starvation [GO:0034198]; cellular response to hyperoxia [GO:0071455]; cellular response to lithium ion [GO:0071285]; circadian rhythm [GO:0007623]; dendrite regeneration [GO:0031104]; extrinsic apopt…	calmodulin binding [GO:0005516]; identical protein binding [GO:0042802]; kinase binding [GO:0019900]; protease binding [GO:0002020]; protein-containing complex binding [GO:0044877]; tumor necrosis factor receptor activity [GO:0005031]	apical dendrite [GO:0097440]; apical plasma membrane [GO:0016324]; CD95 death-inducing signaling complex [GO:0031265]; cell surface [GO:0009986]; cytoplasm [GO:0005737]; cytosol [GO:0005829]; death-inducing signaling complex [GO:0031264]; external side of plasma membrane [GO:0009897]; extracellular region [GO:0005576]; extracellular space [GO:0005615]; membrane raft [GO:0045121]; neuron projectio…		257.665	231.186	228.777	222.054	208.934	242.634	183.05	211.942	214.809	284.187	242.499	282.85	IFN signaling
A0A5F8MPX4	Ptpmt1	A0A5F8MPX4_MOUSE	A0A5F8MPX4	deleted								115.384	141.74	141.35	104.834	109.15	126.336	106.342	94.5277	131.49	113.996	135.201	132.592	IFN signaling
Q3U2S4	Otud5	A2AES3_MOUSE;A2AES4_MOUSE;A2AES5_MOUSE;OTUD5_MOUSE	Q3U2S4	OTU domain-containing protein 5 (EC 3.4.19.12) (Deubiquitinating enzyme A) (DUBA)	Otud5 DXImx46e Sfc7	FUNCTION: Deubiquitinating enzyme that functions as negative regulator of the innate immune system. Acts via TRAF3 deubiquitination and subsequent suppression of type I interferon (IFN) production. Has peptidase activity towards 'Lys-48'- and 'Lys-63'-linked polyubiquitin chains. Can also cleave 'Lys-11'-linked ubiquitin chains (in vitro). Controls neuroectodermal differentiation through cleaving…	Alternative splicing;Hydrolase;Nucleus;Phosphoprotein;Protease;Reference proteome;Thiol protease;Ubl conjugation pathway	CD8-positive, alpha-beta T cell differentiation [GO:0043374]; negative regulation of canonical Wnt signaling pathway [GO:0090090]; negative regulation of interleukin-17 production [GO:0032700]; neural crest cell differentiation [GO:0014033]; positive regulation of TORC1 signaling [GO:1904263]; positive regulation of TORC2 signaling [GO:1904515]; proteasome-mediated ubiquitin-dependent protein cat…	cysteine-type deubiquitinase activity [GO:0004843]; deubiquitinase activity [GO:0101005]; K48-linked deubiquitinase activity [GO:1990380]; K63-linked deubiquitinase activity [GO:0061578]	nucleus [GO:0005634]		25.2679	37.6875	30.495	22.1828	20.3577	24.7119	17.9971	21.3596	36.5492	16.7991	30.7579	15.1251	IFN signaling
Q6Q899	Ddx58	A2AP29_MOUSE;DDX58_MOUSE	Q6Q899	Antiviral innate immune response receptor RIG-I (ATP-dependent RNA helicase DDX58) (EC 3.6.4.13) (DEAD box protein 58) (RIG-I-like receptor 1) (RLR-1) (RNA sensor RIG-I) (Retinoic acid-inducible gene 1 protein) (RIG-1) (Retinoic acid-inducible gene I protein) (RIG-I)	Rigi Ddx58	FUNCTION: Innate immune receptor that senses cytoplasmic viral nucleic acids and activates a downstream signaling cascade leading to the production of type I interferons and pro-inflammatory cytokines. Forms a ribonucleoprotein complex with viral RNAs on which it homooligomerizes to form filaments. The homooligomerization allows the recruitment of RNF135 an E3 ubiquitin-protein ligase that activa…	3D-structure;Acetylation;Alternative splicing;Antiviral defense;ATP-binding;Cell junction;Cell membrane;Cell projection;Cytoplasm;Cytoskeleton;Helicase;Hydrolase;Immunity;Innate immunity;Isopeptide bond;Membrane;Metal-binding;Nucleotide-binding;Phosphoprotein;Reference proteome;Repeat;RNA-binding;Tight junction;Ubl conjugation;Zinc	antiviral innate immune response [GO:0140374]; cellular response to exogenous dsRNA [GO:0071360]; cytosolic pattern recognition receptor signaling pathway [GO:0002753]; defense response to virus [GO:0051607]; detection of virus [GO:0009597]; gene expression [GO:0010467]; innate immune response [GO:0045087]; positive regulation of defense response to virus by host [GO:0002230]; positive regulation…	ATP binding [GO:0005524]; ATP hydrolysis activity [GO:0016887]; double-stranded DNA binding [GO:0003690]; double-stranded RNA binding [GO:0003725]; GTP binding [GO:0005525]; identical protein binding [GO:0042802]; molecular function activator activity [GO:0140677]; pattern recognition receptor activity [GO:0038187]; RNA helicase activity [GO:0003724]; single-stranded RNA binding [GO:0003727]; ubi…	actin cytoskeleton [GO:0015629]; bicellular tight junction [GO:0005923]; cytoplasm [GO:0005737]; cytosol [GO:0005829]; ribonucleoprotein complex [GO:1990904]; ruffle membrane [GO:0032587]		80.0469	63.2987	50.5969	102.019	84.9165	70.4931	80.6987	62.8234	123.267	86.0695	NaN	134.794	IFN signaling
P16951	Atf2	A2AQE9_MOUSE;G3UXC3_MOUSE;ATF2_MOUSE	P16951	Cyclic AMP-dependent transcription factor ATF-2 (cAMP-dependent transcription factor ATF-2) (Activating transcription factor 2) (MXBP protein) (cAMP response element-binding protein CRE-BP1)	Atf2	FUNCTION: Transcriptional activator which regulates the transcription of various genes, including those involved in anti-apoptosis, cell growth, and DNA damage response. Dependent on its binding partner, binds to CRE (cAMP response element) consensus sequences (5'-TGACGTCA-3') or to AP-1 (activator protein 1) consensus sequences (5'-TGACTCA-3'). In the nucleus, contributes to global transcription…	Acetylation;Activator;Alternative splicing;Cytoplasm;DNA damage;DNA-binding;Membrane;Metal-binding;Mitochondrion;Mitochondrion outer membrane;Nucleus;Phosphoprotein;Reference proteome;Transcription;Transcription regulation;Zinc;Zinc-finger	abducens nucleus development [GO:0021742]; adipose tissue development [GO:0060612]; amelogenesis [GO:0097186]; apoptotic process [GO:0006915]; apoptotic process involved in development [GO:1902742]; BMP signaling pathway [GO:0030509]; brainstem development [GO:0003360]; cellular lipid metabolic process [GO:0044255]; cellular response to anisomycin [GO:0072740]; cellular response to leucine starva…	cAMP response element binding [GO:0035497]; cAMP response element binding protein binding [GO:0008140]; chromatin binding [GO:0003682]; cis-regulatory region sequence-specific DNA binding [GO:0000987]; DNA binding [GO:0003677]; DNA-binding transcription activator activity, RNA polymerase II-specific [GO:0001228]; DNA-binding transcription factor activity [GO:0003700]; DNA-binding transcription fa…	CCAAT-binding factor complex [GO:0016602]; chromatin [GO:0000785]; cytoplasm [GO:0005737]; H4 histone acetyltransferase complex [GO:1902562]; membrane [GO:0016020]; mitochondrial outer membrane [GO:0005741]; nucleoplasm [GO:0005654]; nucleus [GO:0005634]; RNA polymerase II transcription regulator complex [GO:0090575]; site of double-strand break [GO:0035861]		266.435	264.384	218.93	198.588	210.744	219.902	234.191	218.848	268.041	328.854	287.421	275.608	IFN signaling
O08863	Birc3	A2CGA5_MOUSE;BIRC3_MOUSE	O08863	Baculoviral IAP repeat-containing protein 3 (EC 2.3.2.27) (Cellular inhibitor of apoptosis 2) (C-IAP2) (Inhibitor of apoptosis protein 1) (mIAP1) (RING-type E3 ubiquitin transferase BIRC3)	Birc3	FUNCTION: Multi-functional protein which regulates not only caspases and apoptosis, but also modulates inflammatory signaling and immunity, mitogenic kinase signaling and cell proliferation, as well as cell invasion and metastasis. Acts as an E3 ubiquitin-protein ligase regulating NF-kappa-B signaling and regulates both canonical and non-canonical NF-kappa-B signaling by acting in opposite direct…	Apoptosis;Cytoplasm;Metal-binding;Nucleus;Phosphoprotein;Reference proteome;Repeat;Transferase;Ubl conjugation;Ubl conjugation pathway;Zinc;Zinc-finger	cellular response to tumor necrosis factor [GO:0071356]; necroptotic process [GO:0070266]; negative regulation of apoptotic process [GO:0043066]; negative regulation of necroptotic process [GO:0060546]; negative regulation of phosphorylation [GO:0042326]; negative regulation of reactive oxygen species metabolic process [GO:2000378]; positive regulation of protein polyubiquitination [GO:1902916]; …	cysteine-type endopeptidase inhibitor activity involved in apoptotic process [GO:0043027]; metal ion binding [GO:0046872]; protein-containing complex binding [GO:0044877]; transferase activity [GO:0016740]; ubiquitin protein ligase activity [GO:0061630]; ubiquitin-protein transferase activity [GO:0004842]	cytoplasm [GO:0005737]; cytosol [GO:0005829]; membrane raft [GO:0045121]; nucleoplasm [GO:0005654]; nucleus [GO:0005634]; protein-containing complex [GO:0032991]		103.758	103.433	99.4908	110.05	97.6367	85.4849	85.3136	76.2004	90.6379	94.4612	121.185	95.5271	IFN signaling
G3X8U9	Mapk8	A6P3E4_MOUSE;G3X8U9_MOUSE	G3X8U9	Stress-activated protein kinase JNK (EC 2.7.11.24)	Mapk8	FUNCTION: Responds to activation by environmental stress and pro-inflammatory cytokines by phosphorylating a number of transcription factors, and thus regulates transcriptional activity. {ECO:0000256|RuleBase:RU368052}.	ATP-binding;Biological rhythms;Cytoplasm;Kinase;Magnesium;Nucleotide-binding;Phosphoprotein;Proteomics identification;Reference proteome;Serine/threonine-protein kinase;Transferase	cellular response to amino acid starvation [GO:0034198]; cellular response to cadmium ion [GO:0071276]; cellular response to lipopolysaccharide [GO:0071222]; cellular response to mechanical stimulus [GO:0071260]; cellular response to reactive oxygen species [GO:0034614]; JUN phosphorylation [GO:0007258]; negative regulation of apoptotic process [GO:0043066]; negative regulation of protein binding…	ATP binding [GO:0005524]; enzyme activator activity [GO:0008047]; histone deacetylase binding [GO:0042826]; histone deacetylase regulator activity [GO:0035033]; JUN kinase activity [GO:0004705]; protein phosphatase binding [GO:0019903]; protein serine kinase activity [GO:0106310]; protein serine/threonine kinase binding [GO:0120283]	cytoplasm [GO:0005737]; nucleus [GO:0005634]		291.02	262.987	257.81	265.275	250.397	239.127	249.997	292.7	261.287	316.268	368.329	276.762	IFN signaling
B1ASP2	Jak1	B1ASP2_MOUSE	B1ASP2	Tyrosine-protein kinase (EC 2.7.10.2)	Jak1		3D-structure;ATP-binding;Coiled coil;Kinase;Nucleotide-binding;Phosphoprotein;Proteomics identification;Reference proteome;SH2 domain;Transferase;Tyrosine-protein kinase	interleukin-11-mediated signaling pathway [GO:0038154]; interleukin-15-mediated signaling pathway [GO:0035723]; interleukin-2-mediated signaling pathway [GO:0038110]; interleukin-4-mediated signaling pathway [GO:0035771]; interleukin-6-mediated signaling pathway [GO:0070102]; interleukin-9-mediated signaling pathway [GO:0038113]; intracellular signal transduction [GO:0035556]; positive regulation…	ATP binding [GO:0005524]; CCR5 chemokine receptor binding [GO:0031730]; growth hormone receptor binding [GO:0005131]; non-membrane spanning protein tyrosine kinase activity [GO:0004715]; protein phosphatase binding [GO:0019903]; transcription regulator activator activity [GO:0140537]; ubiquitin protein ligase binding [GO:0031625]	cytoplasm [GO:0005737]; cytoskeleton [GO:0005856]; endomembrane system [GO:0012505]; extrinsic component of cytoplasmic side of plasma membrane [GO:0031234]; nucleus [GO:0005634]		920.016	753.773	784.647	825.158	902.175	757.15	689.71	751.274	824.314	899.333	892.77	802.676	IFN signaling
Q8BR10	Irak1	B1AUW6_MOUSE;B1AUW8_MOUSE;B1AUW9_MOUSE;IRAK1_MOUSE;Q8BR10_MOUSE	Q8BR10	Interleukin-1 receptor-associated kinase 1	Irak1		ATP-binding;Nucleotide-binding;Proteomics identification;Reference proteome	cellular response to chemical stimulus [GO:0070887]; innate immune response [GO:0045087]; protein phosphorylation [GO:0006468]; regulation of response to stimulus [GO:0048583]; response to organic substance [GO:0010033]; signal transduction [GO:0007165]	ATP binding [GO:0005524]; protein kinase activity [GO:0004672]			86.9096	103.164	95.447	155.151	149.363	196.439	151.005	143.033	155.072	139.342	218.948	156.919	IFN signaling
B2RUR8	Otud7b	OTU7B_MOUSE	B2RUR8	OTU domain-containing protein 7B (EC 3.4.19.12) (Cellular zinc finger anti-NF-kappa-B protein) (Zinc finger A20 domain-containing protein 1) (Zinc finger protein Cezanne)	Otud7b	FUNCTION: Negative regulator of the non-canonical NF-kappa-B pathway that acts by mediating deubiquitination of TRAF3, an inhibitor of the NF-kappa-B pathway, thereby acting as a negative regulator of B-cell responses. In response to non-canonical NF-kappa-B stimuli, deubiquitinates 'Lys-48'-linked polyubiquitin chains of TRAF3, preventing TRAF3 proteolysis and over-activation of non-canonical NF…	Adaptive immunity;Cytoplasm;Hydrolase;Immunity;Metal-binding;Nucleus;Phosphoprotein;Protease;Reference proteome;Thiol protease;Ubl conjugation pathway;Zinc;Zinc-finger	adaptive immune response [GO:0002250]; in utero embryonic development [GO:0001701]; mucosal immune response [GO:0002385]; negative regulation of I-kappaB kinase/NF-kappaB signaling [GO:0043124]; negative regulation of interleukin-8 production [GO:0032717]; negative regulation of protein localization to nucleus [GO:1900181]; negative regulation of transcription by RNA polymerase II [GO:0000122]; p…	cysteine-type deubiquitinase activity [GO:0004843]; cysteine-type peptidase activity [GO:0008234]; DNA binding [GO:0003677]; K48-linked deubiquitinase activity [GO:1990380]; K63-linked polyubiquitin modification-dependent protein binding [GO:0070530]; zinc ion binding [GO:0008270]	cytoplasm [GO:0005737]; nucleus [GO:0005634]		NaN	483.676	510.824	346.623	463.654	329.596	331.049	574.596	638.645	839.231	483.697	846.477	IFN signaling
P42337	Pik3ca	D3YY41_MOUSE;PK3CA_MOUSE	P42337	Phosphatidylinositol 4,5-bisphosphate 3-kinase catalytic subunit alpha isoform (PI3-kinase subunit alpha) (PI3K-alpha) (PI3Kalpha) (PtdIns-3-kinase subunit alpha) (EC 2.7.1.137) (EC 2.7.1.153) (Phosphatidylinositol 4,5-bisphosphate 3-kinase 110 kDa catalytic subunit alpha) (PtdIns-3-kinase subunit p110-alpha) (p110alpha) (Phosphoinositide-3-kinase catalytic alpha polypeptide) (Serine/threonine pr…	Pik3ca	FUNCTION: Phosphoinositide-3-kinase (PI3K) phosphorylates phosphatidylinositol (PI) and its phosphorylated derivatives at position 3 of the inositol ring to produce 3-phosphoinositides. Uses ATP and PtdIns(4,5)P2 (phosphatidylinositol 4,5-bisphosphate) to generate phosphatidylinositol 3,4,5-trisphosphate (PIP3). PIP3 plays a key role by recruiting PH domain-containing proteins to the membrane, in…	3D-structure;Angiogenesis;ATP-binding;Kinase;Nucleotide-binding;Phagocytosis;Proto-oncogene;Reference proteome;Serine/threonine-protein kinase;Transferase	actin cytoskeleton organization [GO:0030036]; adipose tissue development [GO:0060612]; angiogenesis [GO:0001525]; cardiac muscle cell contraction [GO:0086003]; cell migration [GO:0016477]; cellular response to glucose stimulus [GO:0071333]; cellular response to hydrostatic pressure [GO:0071464]; energy homeostasis [GO:0097009]; genomic imprinting [GO:0071514]; glucose metabolic process [GO:000600…	1-phosphatidylinositol-3-kinase activity [GO:0016303]; 1-phosphatidylinositol-4-phosphate 3-kinase activity [GO:0035005]; ATP binding [GO:0005524]; insulin receptor substrate binding [GO:0043560]; kinase activity [GO:0016301]; phosphatidylinositol-3,4-bisphosphate 5-kinase activity [GO:0052812]; phosphatidylinositol-4,5-bisphosphate 3-kinase activity [GO:0046934]; protein kinase activator activit…	cytoplasm [GO:0005737]; cytosol [GO:0005829]; intercalated disc [GO:0014704]; lamellipodium [GO:0030027]; phosphatidylinositol 3-kinase complex [GO:0005942]; phosphatidylinositol 3-kinase complex, class IA [GO:0005943]; phosphatidylinositol 3-kinase complex, class IB [GO:0005944]; plasma membrane [GO:0005886]	PATHWAY: Phospholipid metabolism; phosphatidylinositol phosphate biosynthesis. {ECO:0000250|UniProtKB:P42336}.	116.209	164.623	147.805	153.823	157.119	152.709	110.81	142.977	132.91	218.73	172.38	56.804	IFN signaling
[truncated: 6,745 more rows]

## Sheet: 1b
PG.Pvalue	PG.Cscore	PG.MolecularWeight	PG.ProteinGroups	PG.Genes	PG.ProteinDescriptions	PG.ProteinNames	peptide_counts	CpG_1	CpG_2	CpG_3	PBS_1	PBS_2	PBS_3	MDP_1	MDP_2	MDP_3	MPLA_1	MPLA_2	MPLA_3	Protein names	Function [CC]	Keywords	Gene Ontology (biological process)	Gene Ontology (molecular function)	Gene Ontology (cellular component)	Pathway	Term
[truncated: 7,135 more rows]
